# Supplementary material for: Modular synthesis of all-substituted furans through oxidative carbonylation of cyclopropenes with tandem metal relay catalysis
Source: Royal Society of Chemistry journal article supplement (doi:10.1039/c3ob41155a), 2013-01-01

*Supporting Information*

**Modular Synthesis of All-substitued Furans through Oxidative Carbonylation of Cyclopropenes with Tandem Metal Relay Catalysis**

Chuanling Song, Shuli Dong, Lei Feng, Xianglong Peng, Mingchao Wang, Jianwu Wang and Zhenghu Xu\*

School of chemistry and chemical engineering  
Shandong University, 27 South Shanda Road, Jinan, 250100, China

|                                     |       |
|-------------------------------------|-------|
| General                             | 2     |
| Synthesis of Cyclopropenes          | 2     |
| Optimization of reaction conditions | 3     |
| General procedure of Carbonylation  | 4-10  |
| NMR spectra for the products        | 11-48 |

## General

All NMR spectra were recorded on Bruker-500 or 300 MHz spectrometer. HRMS were measured on the Q-TOF6510 instruments. Routine monitoring of the reaction was performed by TLC using precoated silica gel plates. All the reagents and Solvents used in this reaction such as CH<sub>3</sub>CN were purchased from Acros or local company and used directly. All the reactions don't require inert atmosphere.

## Synthesis of the materials

### Diazomalonates and Cyclopropenes

Diazomalonates and cyclopropenes **1a-1m** were synthesized from the procedures reported in the literature<sup>[1]</sup>

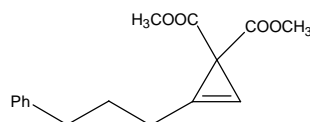

(**1d**) Yield: 76 % <sup>1</sup>H NMR (400 MHz, CDCl<sub>3</sub>) δ 1.90-1.98 (m, 2H), 2.55-2.59 (t, *J* = 7.24 Hz, 2H), 2.67-2.71 (t, *J* = 7.60 Hz, 2H), 3.71 (s, 6H), 6.40 (s, 1H), 7.16-7.30 (m, 5H);

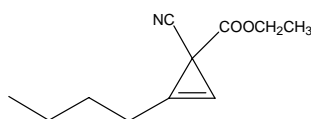

(**1k**) Yield: 70 % <sup>1</sup>H NMR (400 MHz, CDCl<sub>3</sub>) δ 0.94 (t, *J* = 7.36 Hz, 3H), 1.32 (t, *J* = 7.12 Hz, 3H), 1.42-1.46 (m, 2H), 1.62-1.66 (m, 2H), 2.58-2.62 (m, 2H), 4.22-4.28 (m, 2H), 6.43 (s, 1H);

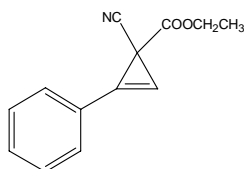

(**1l**) Yield: 52 % <sup>1</sup>H NMR (400 MHz, CDCl<sub>3</sub>) δ 1.33 (t, *J* = 7.12 Hz, 3H), 4.26-4.32 (q, *J* = 7.12 Hz, 2H), 6.93 (s, 1H), 7.50-7.52 (m, 3H), 7.60-7.62 (m, 2H);

## References

1. C. Song, L. Ju, M. Wang, P. Liu, Y. Zhang, J. Wang, Z. Xu, *Chem. Eur. J.* **2013**, *19*, 3584-3589

## Optimization of reaction conditions

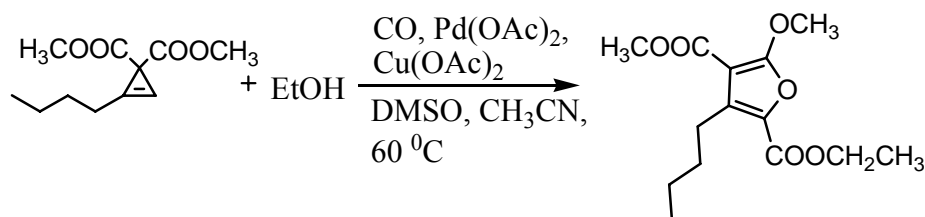

| Entry             | Catalyst                                            | Oxidant                               | Additive                    | Solvent            | Yield/%         |
|-------------------|-----------------------------------------------------|---------------------------------------|-----------------------------|--------------------|-----------------|
| 1 <sup>a</sup>    | Pd(OAc) <sub>2</sub>                                | Cu(OAc) <sub>2</sub>                  | DMSO(3 eq.)                 | CH <sub>3</sub> CN | 35              |
| 2 <sup>a,h</sup>  | Pd(OAc) <sub>2</sub>                                | Cu(OAc) <sub>2</sub>                  | DMSO(3 eq.)                 | CH <sub>3</sub> CN | 68 <sup>g</sup> |
| 3 <sup>a,i</sup>  | Pd(OAc) <sub>2</sub>                                | Cu(OAc) <sub>2</sub>                  | DMSO(3 eq.)                 | CH <sub>3</sub> CN | 67 <sup>g</sup> |
| 4 <sup>a</sup>    | Pd(OAc) <sub>2</sub>                                | Cu(OAc) <sub>2</sub>                  | DMSO(3 eq.)                 | Toluene            | 0               |
| 5 <sup>a</sup>    | Pd(OAc) <sub>2</sub>                                | Cu(OAc) <sub>2</sub>                  | DMSO(3 eq.)                 | DMF                | 7               |
| 6 <sup>a</sup>    | Pd(OAc) <sub>2</sub>                                | Cu(OAc) <sub>2</sub>                  | DMSO(3 eq.)                 | THF                | 9               |
| 7 <sup>a</sup>    | Pd(OAc) <sub>2</sub>                                | Cu(OAc) <sub>2</sub>                  | DMSO(3 eq.)                 | 1,2-DCE            | <5              |
| 8 <sup>a</sup>    | Pd(OAc) <sub>2</sub>                                | Cu(OAc) <sub>2</sub>                  | DMSO(3 eq.)                 | DMSO               | 17.6            |
| 9 <sup>b</sup>    | Pd(OAc) <sub>2</sub>                                | Cu(OAc) <sub>2</sub>                  | DMSO(3 eq.)                 | CH <sub>3</sub> CN | 62              |
| 10 <sup>b</sup>   | Pd(OAc) <sub>2</sub>                                | Cu(acac) <sub>2</sub>                 | DMSO(3 eq.)                 | CH <sub>3</sub> CN | 3.2             |
| 11 <sup>b</sup>   | Pd(OAc) <sub>2</sub>                                | Cu(Me <sub>3</sub> CCOO) <sub>2</sub> | DMSO(3 eq.)                 | CH <sub>3</sub> CN | 23              |
| 12 <sup>b</sup>   | Pd(OAc) <sub>2</sub>                                | Cu(OH) <sub>2</sub>                   | DMSO(3 eq.)                 | CH <sub>3</sub> CN | 7               |
| 13 <sup>b</sup>   | Pd(OAc) <sub>2</sub>                                | Cu(OTf) <sub>2</sub>                  | DMSO(3 eq.)                 | CH <sub>3</sub> CN | N.R.            |
| 14 <sup>b</sup>   | Pd(OAc) <sub>2</sub>                                | AgOAc                                 | DMSO(3 eq.)                 | CH <sub>3</sub> CN | 48              |
| 15 <sup>b</sup>   | Pd(OAc) <sub>2</sub>                                | Ag <sub>2</sub> CO <sub>3</sub>       | DMSO(3 eq.)                 | CH <sub>3</sub> CN | 26              |
| 16 <sup>b</sup>   | PdCl <sub>2</sub>                                   | Cu(OAc) <sub>2</sub>                  | DMSO(3 eq.)                 | CH <sub>3</sub> CN | 10              |
| 17 <sup>b</sup>   | Pd(TFA) <sub>2</sub>                                | Cu(OAc) <sub>2</sub>                  | DMSO(3 eq.)                 | CH <sub>3</sub> CN | 31              |
| 18 <sup>b</sup>   | PdCl <sub>2</sub> (CH <sub>3</sub> CN) <sub>2</sub> | Cu(OAc) <sub>2</sub>                  | DMSO(3 eq.)                 | CH <sub>3</sub> CN | 67              |
| 19 <sup>b</sup>   | Pd(PPh <sub>3</sub> ) <sub>4</sub>                  | Cu(OAc) <sub>2</sub>                  | DMSO(3 eq.)                 | CH <sub>3</sub> CN | 65              |
| 20 <sup>b</sup>   | Pd <sub>2</sub> (dba) <sub>3</sub>                  | Cu(OAc) <sub>2</sub>                  | DMSO(3 eq.)                 | CH <sub>3</sub> CN | 50              |
| 21 <sup>b</sup>   | PdCl <sub>2</sub> (PPh <sub>3</sub> ) <sub>2</sub>  | Cu(OAc) <sub>2</sub>                  | DMSO(3 eq.)                 | CH <sub>3</sub> CN | 33              |
| 22 <sup>b</sup>   | Pd(OAc) <sub>2</sub>                                | Cu(OAc) <sub>2</sub>                  | DMSO(3 eq.)+NaI             | CH <sub>3</sub> CN | 39              |
| 23 <sup>b</sup>   | Pd(OAc) <sub>2</sub>                                | Cu(OAc) <sub>2</sub>                  | PhSOCH <sub>3</sub> (3 eq.) | CH <sub>3</sub> CN | trace           |
| 24 <sup>b</sup>   | Pd(OAc) <sub>2</sub>                                | Cu(OAc) <sub>2</sub>                  | PhSOPh(3 eq.)               | CH <sub>3</sub> CN | trace           |
| 25 <sup>b</sup>   | Pd(OAc) <sub>2</sub>                                | Cu(OAc) <sub>2</sub>                  | BnSOBn(3 eq.)               | CH <sub>3</sub> CN | trace           |
| 26 <sup>b</sup>   | Pd(OAc) <sub>2</sub>                                | Cu(OAc) <sub>2</sub>                  | DMSO(7 eq.)                 | CH <sub>3</sub> CN | 84              |
| 27 <sup>c</sup>   | Pd(OAc) <sub>2</sub>                                | Cu(OAc) <sub>2</sub>                  | DMSO(7 eq.)                 | CH <sub>3</sub> CN | 73              |
| 28 <sup>b,d</sup> | Pd(OAc) <sub>2</sub>                                | Cu(OAc) <sub>2</sub>                  | DMSO(7 eq.)                 | CH <sub>3</sub> CN | 10              |
| 29 <sup>b,e</sup> | Pd(OAc) <sub>2</sub>                                | Cu(OAc) <sub>2</sub>                  | DMSO(7 eq.)                 | CH <sub>3</sub> CN | Trace           |
| 30 <sup>b,f</sup> | Pd(OAc) <sub>2</sub>                                | Cu(OAc) <sub>2</sub>                  | DMSO(7 eq.)                 | CH <sub>3</sub> CN | Trace           |
| 31 <sup>a</sup>   | Pd(OAc) <sub>2</sub>                                | /                                     | DMSO(7 eq.)                 | CH <sub>3</sub> CN | N.R.            |
| 32 <sup>a</sup>   | /                                                   | Cu(OAc) <sub>2</sub>                  | DMSO(7 eq.)                 | CH <sub>3</sub> CN | 42 <sup>j</sup> |

Reaction conditions: <sup>a</sup>1a(0.2 mmol, 42.4 mg), Pd(OAc)<sub>2</sub>(5 mol%, 0.01 mmol, 2.24 mg), Cu(OAc)<sub>2</sub>(2 eq. 0.4 mmol, 79.6 mg), 0.2 ml EtOH, DMSO(3 eq. 0.6 mmol, 46.8 mg), 1.0 ml CH<sub>3</sub>CN; <sup>b</sup>Pd(OAc)<sub>2</sub>(5 %, 0.01 mmol, 2.24 mg), Cu(OAc)<sub>2</sub>(2 eq. 0.4 mmol, 79.6 mg), 0.2 ml EtOH, DMSO, 1.5 ml CH<sub>3</sub>CN, 1a(0.2 mmol, 42.4 mg) was slowly injected into the system for 1h; <sup>c</sup>1a(0.2 mmol, 42.4 mg) was slowly injected into the system for 2 hrs; <sup>d</sup>0.5 mL EtOH; <sup>e</sup>0.1 mL EtOH; <sup>f</sup>1.2 eq. Cu(OAc)<sub>2</sub>; <sup>g</sup>the yield of dimerization product; <sup>h</sup>80 °C; <sup>i</sup>100 °C; <sup>j</sup>the yield of Isomerization product.

## General procedure of Reactions

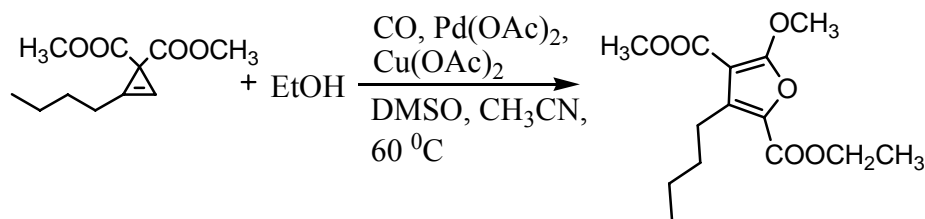

A mixture of  $\text{Pd}(\text{OAc})_2$  (2.24 mg, 0.01 mmol, 5 mol%) and  $\text{Cu}(\text{OAc})_2$  (79.6 mg, 0.4 mmol, 2 eq.) was dissolved in 0.5 mL  $\text{CH}_3\text{CN}$ , DMSO (106.4 mg, 1.4 mmol, 7 eq.) and 0.2 mL EtOH. The schlenk tube was vacuumed and attached with a CO balloon. Then the solution of **1a** (42.4 mg, 0.2 mmol) in 1 mL  $\text{CH}_3\text{CN}$  was injected into the reaction system by syringe pump in 1 h. The resulting mixture was stirred at 60 °C until the reaction was completed (about 3 h, monitored by TLC). The reaction mixture was filtered and evaporated under reduced pressure and purified by column chromatography (silica gel) to give the pure product **3a**.

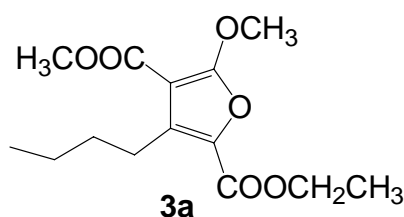

**(3a)** Yield: 78 %  $^1\text{H}$  NMR (400 MHz,  $\text{CDCl}_3$ )  $\delta$  0.95 (t,  $J = 7.28$  Hz, 3H), 1.38 (t,  $J = 7.14$  Hz, 3H), 1.40-1.44 (m, 2H), 1.51-1.59 (m, 2H), 3.03 (t,  $J = 7.84$  Hz, 2H), 3.83 (s, 3H), 4.20 (s, 3H), 4.35 (q,  $J = 7.12$  Hz, 2H);  $^{13}\text{C}$  NMR (100MHz,  $\text{CDCl}_3$ )  $\delta$  13.79, 14.31, 22.67, 24.59, 32.17, 51.07, 57.79, 60.39, 93.31, 130.87, 139.54, 158.85, 163.02, 163.13; HRMS exact mass calcd for  $(\text{C}_{14}\text{H}_{20}\text{O}_6 + \text{H})$  requires  $m/z$  285.1333, found  $m/z$  285.1354.

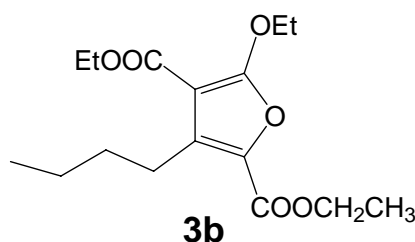

**(3b)** Yield: 65 %  $^1\text{H}$  NMR (400 MHz,  $\text{CDCl}_3$ )  $\delta$  0.88 (t,  $J = 5.96$  Hz, 3H), 1.28-1.72 (m, 13H), 3.03 (t,  $J = 7.84$  Hz, 2H), 4.27-4.37 (m, 4H), 4.54-4.59 (q,  $J = 7.08$  Hz, 2H);  $^{13}\text{C}$  NMR (100MHz,  $\text{CDCl}_3$ )  $\delta$  13.91, 14.26, 14.39, 14.77, 22.82, 24.82, 32.30, 59.94, 60.39, 67.63, 93.97, 130.63, 139.28, 159.04, 162.85, 163.14; HRMS exact mass calcd for  $(\text{C}_{16}\text{H}_{24}\text{O}_6 + \text{H})$  requires  $m/z$  313.1646, found  $m/z$  313.1644.

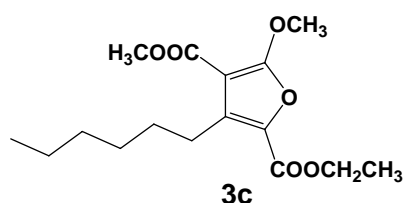

**(3c)** Yield: 93 %  $^1\text{H}$  NMR (400 MHz,  $\text{CDCl}_3$ )  $\delta$  0.78-0.80 (m, 3H), 1.25-1.31 (m, 4H), 1.34-1.41 (m, 5H), 1.50-1.57 (m, 2H), 3.00 (t,  $J = 7.92$  Hz, 2H), 3.80 (s, 3H), 4.18 (s, 3H), 4.30-4.37 (q,  $J = 7.12$  Hz, 2H);  $^{13}\text{C}$  NMR (100MHz,  $\text{CDCl}_3$ )  $\delta$  14.05, 14.35, 22.61, 24.91, 29.33, 30.05, 31.57, 51.15, 57.83, 60.44, 93.26, 130.85, 139.59, 158.91, 163.07, 163.16; HRMS exact mass calcd for ( $\text{C}_{16}\text{H}_{24}\text{O}_6 + \text{H}$ ) requires  $m/z$  313.1646, found  $m/z$  313.1643.

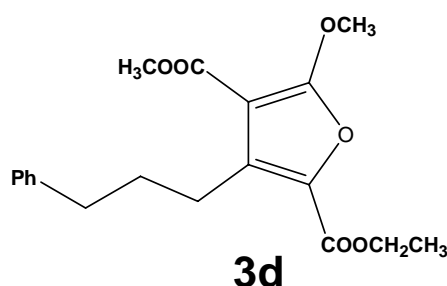

**(3d)** Yield: 75 %  $^1\text{H}$  NMR (400 MHz,  $\text{CDCl}_3$ )  $\delta$  1.31 (t,  $J = 7.10$  Hz, 3H), 1.87-1.93 (m, 2H), 2.70 (t,  $J = 7.76$  Hz, 2H), 3.06 (t,  $J = 7.78$  Hz, 2H), 3.75 (s, 3H), 4.18 (s, 3H), 4.29 (q,  $J = 7.10$  Hz, 2H), 7.18-7.25 (m, 5H);  $^{13}\text{C}$  NMR (100MHz,  $\text{CDCl}_3$ )  $\delta$  14.37, 24.83, 31.61, 35.98, 51.15, 57.88, 60.50, 93.38, 125.69, 128.22, 128.45, 131.01, 138.85, 142.25, 158.84, 163.01, 163.25; HRMS exact mass calcd for ( $\text{C}_{19}\text{H}_{22}\text{O}_6 + \text{H}$ ) requires  $m/z$  347.1489, found  $m/z$  347.1495.

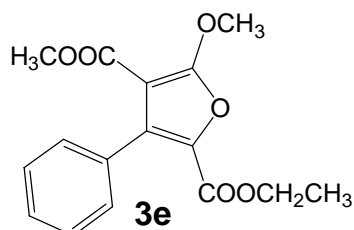

**(3e)**Yield: 86 %  $^1\text{H}$  NMR (400 MHz,  $\text{CDCl}_3$ )  $\delta$  1.09 (t,  $J = 7.12$  Hz, 3H), 3.64 (s, 3H), 4.14 (q,  $J = 7.12$  Hz, 2H), 4.29 (s, 3H), 7.32-7.40 (m, 5H);  $^{13}\text{C}$  NMR (100MHz,  $\text{CDCl}_3$ )  $\delta$  13.88, 51.20, 58.17, 60.57, 94.14, 127.24, 128.04, 129.43, 130.79, 131.21, 136.89, 158.31, 162.52, 162.91; HRMS exact mass calcd for ( $\text{C}_{16}\text{H}_{16}\text{O}_6 + \text{H}$ ) requires  $m/z$  305.1020, found  $m/z$  305.1027.

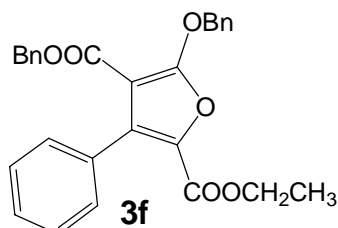

**(3f)** Yield: 70 %  $^1\text{H}$  NMR (400 MHz,  $\text{CDCl}_3$ )  $\delta$  1.11 (t,  $J = 7.12$  Hz, 3H), 4.15 (q,  $J = 7.16$  Hz, 2H), 5.11 (s, 2H), 5.59 (s, 2H), 7.05-7.52 (m, 15H);  $^{13}\text{C}$  NMR (100MHz,  $\text{CDCl}_3$ )  $\delta$  13.91, 60.58, 65.72, 73.20, 94.95, 127.37, 127.66, 127.73, 128.04, 128.27, 128.53, 128.75, 128.95, 129.47, 130.94, 131.28, 134.32, 135.73, 136.65, 158.30, 161.79, 162.58; HRMS exact mass calcd for ( $\text{C}_{28}\text{H}_{24}\text{O}_6 + \text{H}$ ) requires  $m/z$  457.1646, found  $m/z$  457.1641.

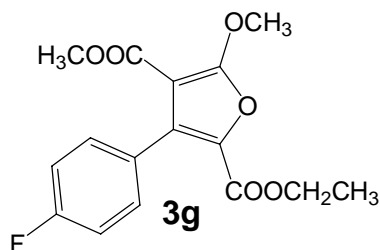

**(3g)** Yield: 83 %  $^1\text{H}$  NMR (400 MHz,  $\text{CDCl}_3$ )  $\delta$  1.12 (t,  $J = 6.12$  Hz, 3H), 3.65 (s, 3H), 4.15-4.17 (m, 2H), 4.27 (s, 3H), 7.06-7.30 (m, 4H);  $^{13}\text{C}$  NMR (100MHz,  $\text{CDCl}_3$ )  $\delta$  13.94, 51.22, 58.18, 60.66, 94.04, 114.21, 114.42, 127.00, 127.04, 130.87, 131.33, 131.41, 135.87, 158.18, 161.44, 162.45, 162.93, 163.89; HRMS exact mass calcd for ( $\text{C}_{16}\text{H}_{15}\text{O}_6\text{F} + \text{H}$ ) requires  $m/z$  323.0925, found  $m/z$  323.0933.

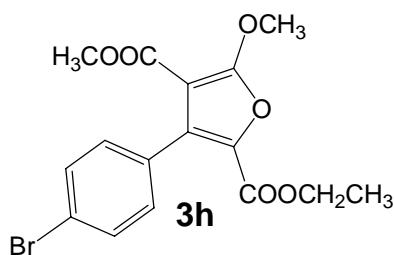

**(3h)** Yield: 75 %  $^1\text{H}$  NMR (400 MHz,  $\text{CDCl}_3$ )  $\delta$  1.34 (t,  $J = 6.32$  Hz, 3H), 3.66 (s, 3H), 4.16-4.17 (m, 2H), 4.28 (s, 3H), 7.20 (d,  $J = 7.40$  Hz, 2H), 7.52 (d,  $J = 7.40$  Hz, 2H);  $^{13}\text{C}$  NMR (100 MHz,  $\text{CDCl}_3$ )  $\delta$  13.97, 51.28, 58.24, 60.75, 93.93, 122.40, 130.13, 130.48, 130.72, 131.24, 135.64, 158.09, 162.37, 162.93; HRMS exact mass calcd for ( $\text{C}_{16}\text{H}_{15}\text{O}_6\text{Br} + \text{H}$ ) requires  $m/z$  383.0125, found  $m/z$  383.0134, 385.0114.

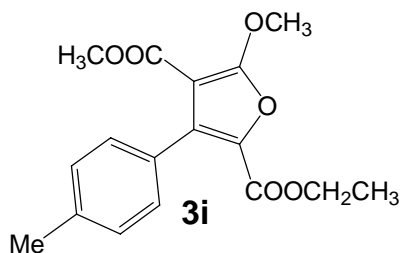

**(3i)** Yield: 87 %  $^1\text{H}$  NMR (400 MHz,  $\text{CDCl}_3$ )  $\delta$  1.12 (t,  $J = 7.12$  Hz, 3H), 2.34 (s, 3H), 3.64 (s, 3H), 4.14 (q,  $J = 7.12$  Hz, 2H), 4.24 (s, 3H), 7.18-7.22 (m, 5H);  $^{13}\text{C}$  NMR (100MHz,  $\text{CDCl}_3$ )  $\delta$  13.99, 21.42, 51.21, 58.12, 60.54, 94.11, 127.96, 128.00, 129.39, 130.72, 137.17, 137.81, 158.32, 162.57, 162.82; HRMS exact mass calcd for ( $\text{C}_{17}\text{H}_{18}\text{O}_6 + \text{Na}$ ) requires  $m/z$  319.1176, found  $m/z$  319.1173.

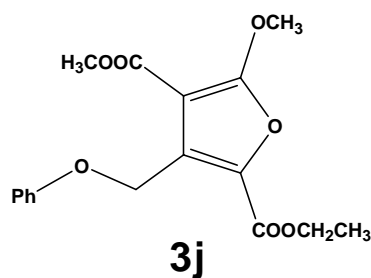

**(3j)** Yield: 71 %  $^1\text{H}$  NMR (400 MHz,  $\text{CDCl}_3$ )  $\delta$  1.27 (t,  $J = 7.12$  Hz, 3H), 3.72 (s, 3H), 4.21 (s, 3H), 4.31 (q,  $J = 7.12$  Hz, 2H), 5.42 (s, 2H), 6.95-6.98 (m, 3H), 7.26-7.28 (m, 2H);  $^{13}\text{C}$  NMR (100 MHz,  $\text{CDCl}_3$ )  $\delta$  14.22, 51.46, 58.28, 59.64, 61.13, 93.57, 114.98, 121.03, 129.39, 131.17, 132.62, 158.26, 158.89, 162.55, 162.99; HRMS exact mass calcd for ( $\text{C}_{17}\text{H}_{18}\text{O}_7 + \text{H}$ ) requires  $m/z$  335.1125, found  $m/z$  335.1132.

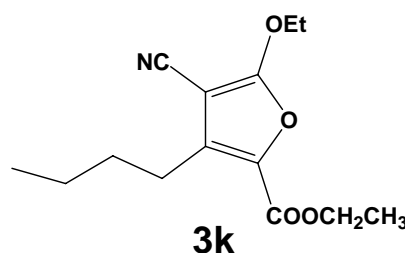

**(3k)** Yield: 91 %  $^1\text{H}$  NMR (400 MHz,  $\text{CDCl}_3$ )  $\delta$  0.94 (t,  $J = 7.36$  Hz, 3H), 1.34-1.37 (t,  $J = 7.12$  Hz, 3H), 1.38-1.42 (m, 2H), 1.47-1.50 (t,  $J = 7.12$  Hz, 3H), 1.57-1.63 (m, 2H), 2.78-2.82 (t,  $J = 7.68$  Hz, 2H), 4.30-4.35 (q,  $J = 7.08$  Hz, 2H), 4.55-4.61 (q,  $J = 7.08$  Hz, 2H);  $^{13}\text{C}$  NMR (100 MHz,  $\text{CDCl}_3$ )  $\delta$  13.72, 14.29, 14.64, 22.36, 24.90, 31.39, 60.83, 68.72, 75.37, 112.35, 130.90, 138.53, 158.09, 164.22; HRMS exact mass calcd for ( $\text{C}_{14}\text{H}_{29}\text{O}_4\text{N} + \text{H}$ ) requires  $m/z$  266.1387, found  $m/z$  266.1379.

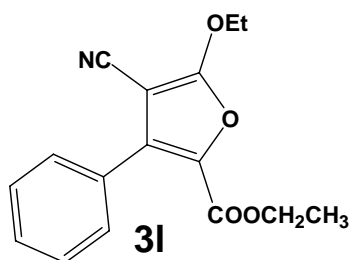

**(3l)** Yield: 51 %  $^1\text{H}$  NMR (400 MHz,  $\text{CDCl}_3$ )  $\delta$  1.21 (t,  $J = 7.12$  Hz, 3H), 1.53 (t,  $J = 7.08$  Hz, 3H), 4.20-4.26 (q,  $J = 7.12$  Hz, 2H), 4.63-4.68 (q,  $J = 7.04$  Hz, 2H), 7.43-7.54 (m, 5H);  $^{13}\text{C}$  NMR (100 MHz,  $\text{CDCl}_3$ )  $\delta$  14.04, 14.72, 61.09, 69.06, 75.71, 112.34, 128.15, 128.51, 129.51, 129.55, 130.11, 136.29, 157.69, 164.57; HRMS exact mass calcd for ( $\text{C}_{16}\text{H}_{15}\text{O}_4\text{N} + \text{H}$ ) requires  $m/z$  286.1074, found  $m/z$  286.1077.

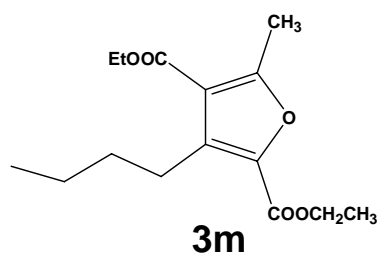

**(3m)** Yield: 35 %  $^1\text{H}$  NMR (400 MHz,  $\text{CDCl}_3$ )  $\delta$  0.92 (t,  $J = 7.28$  Hz, 3H), 1.38-1.42 (m, 8H), 1.49-1.54 (m, 2H), 2.61 (s, 3H), 3.00 (t,  $J = 7.76$  Hz, 2H), 4.30-4.37 (m, 4H);  $^{13}\text{C}$  NMR (100MHz,  $\text{CDCl}_3$ )  $\delta$  13.89, 14.22, 14.33, 14.82, 22.81, 24.42, 32.53, 60.28, 60.67, 115.28, 136.74, 138.71, 159.26, 162.38, 163.63; HRMS exact mass calcd for ( $\text{C}_{15}\text{H}_{22}\text{O}_5 + \text{H}$ ) requires  $m/z$  283.1540, found  $m/z$  283.1548.

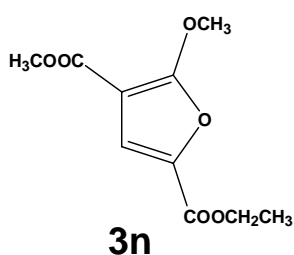

**(3n)** Yield: 84 %  $^1\text{H}$  NMR (400 MHz,  $\text{CDCl}_3$ )  $\delta$  1.35 (t,  $J = 7.12$  Hz, 3H), 3.81 (s, 3H), 4.22 (s, 3H), 4.31 (q,  $J = 7.12$  Hz, 2H), 7.41 (s, 1H);  $^{13}\text{C}$  NMR (100MHz,  $\text{CDCl}_3$ )  $\delta$  14.33, 51.54, 58.40, 60.95, 93.70, 120.79, 134.10, 157.96, 162.44, 163.05; HRMS exact mass calcd for ( $\text{C}_{10}\text{H}_{12}\text{O}_6 + \text{H}$ ) requires  $m/z$  229.0707, found  $m/z$  229.0702.

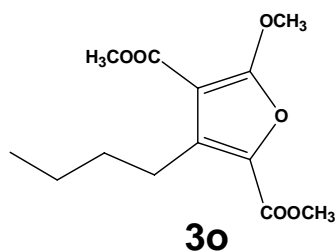

**(3o)** Yield: 58 %  $^1\text{H}$  NMR (400 MHz,  $\text{CDCl}_3$ )  $\delta$  0.91 (t,  $J = 7.28$  Hz, 3H), 1.35-1.41 (m, 2H), 1.49-1.53 (m, 2H), 3.00 (q,  $J = 7.68$  Hz, 2H), 3.80 (s, 3H), 3.84 (s, 3H), 4.17 (s, 3H);  $^{13}\text{C}$  NMR (100MHz,  $\text{CDCl}_3$ )  $\delta$  13.84, 22.65, 24.56, 32.16, 51.18, 51.41, 57.86, 93.43, 130.62, 140.08, 159.22, 163.04, 163.15; HRMS exact mass calcd for ( $\text{C}_{13}\text{H}_{18}\text{O}_6 + \text{H}$ ) requires  $m/z$  271.1176, found  $m/z$  271.1184.

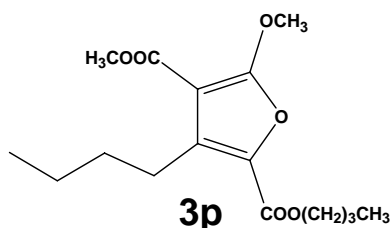



**(3p)** Yield: 58 %  $^1\text{H}$  NMR (400 MHz,  $\text{CDCl}_3$ )  $\delta$  0.92-0.99 (m, 6H), 1.38-1.56 (m, 6H), 1.70-1.74 (m, 2H), 3.00 (t,  $J = 7.24$  Hz, 2H), 3.82 (s, 3H), 4.19 (s, 3H), 4.28 (t,  $J = 6.60$  Hz, 2H);  $^{13}\text{C}$  NMR (100MHz,  $\text{CDCl}_3$ )  $\delta$  13.68, 13.86, 19.25, 22.79, 24.72, 30.79, 32.30, 51.15, 57.82, 64.35, 93.28, 130.93, 139.43, 159.06, 163.08, 163.19; HRMS exact mass calcd for ( $\text{C}_{16}\text{H}_{24}\text{O}_6 + \text{H}$ ) requires  $m/z$  313.1646, found  $m/z$  313.1649.

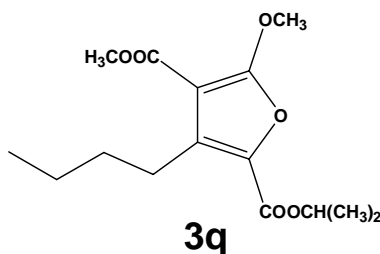

**(3q)** Yield: 88 %  $^1\text{H}$  NMR (400 MHz,  $\text{CDCl}_3$ )  $\delta$  0.91 (t,  $J = 7.28$  Hz, 3H), 1.32 (d,  $J = 6.24$  Hz, 6H), 1.37-1.41 (m, 2H), 1.49-1.53 (m, 2H), 2.97 (t,  $J = 7.92$  Hz, 2H), 3.79 (s, 3H), 4.16 (s, 3H), 5.16-5.22 (m, 1H);  $^{13}\text{C}$  NMR (100MHz,  $\text{CDCl}_3$ )  $\delta$  13.90, 22.02, 22.81, 24.72, 32.29, 51.16, 57.83, 68.15, 93.17, 131.18, 139.12, 158.60, 163.14, 163.17; HRMS exact mass calcd for ( $\text{C}_{15}\text{H}_{22}\text{O}_6 + \text{Na}$ ) requires  $m/z$  299.1489, found  $m/z$  299.1488.

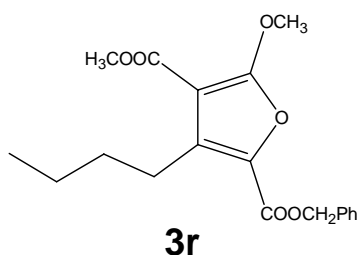

**(3r)** Yield: 65 %  $^1\text{H}$  NMR (400 MHz,  $\text{CDCl}_3$ )  $\delta$  0.86 (t,  $J = 7.32$  Hz, 3H), 1.29-1.35 (m, 2H), 1.47-1.51 (m, 2H), 2.98 (t,  $J = 7.92$  Hz, 2H), 3.81 (s, 3H), 4.18 (s, 3H), 5.31 (s, 2H), 7.33-7.43 (m, 5H);  $^{13}\text{C}$  NMR (100MHz,  $\text{CDCl}_3$ )  $\delta$  13.82, 22.73, 24.77, 32.30, 51.12, 57.90, 66.20, 93.45, 128.31, 128.59, 130.63, 135.81, 140.23, 158.70, 163.04, 163.33; HRMS exact mass calcd for ( $\text{C}_{19}\text{H}_{22}\text{O}_6 + \text{H}$ ) requires  $m/z$  347.1489, found  $m/z$  347.1483.

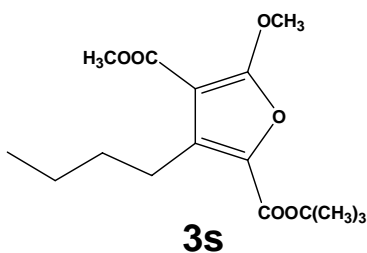

**(3s)** Yield: 41 %  $^1\text{H}$  NMR (400 MHz,  $\text{CDCl}_3$ )  $\delta$  0.93 (t,  $J = 7.24$  Hz, 3H), 1.36-1.42 (m, 2H), 1.48-1.50 (m, 2H), 1.57(s, 9H), 2.96 (t,  $J = 7.92$  Hz, 2H), 3.81 (s, 3H), 4.17 (s, 3H);  $^{13}\text{C}$  NMR (100MHz,  $\text{CDCl}_3$ )  $\delta$  13.98, 22.85, 24.82, 28.39, 32.39, 51.14, 57.72, 81.78, 92.97, 131.88, 138.06, 158.47, 163.06, 163.25; HRMS exact mass calcd for ( $\text{C}_{16}\text{H}_{24}\text{O}_6 + \text{Na}$ ) requires  $m/z$  335.1465, found  $m/z$  335.1471.

## NMR spectras for products

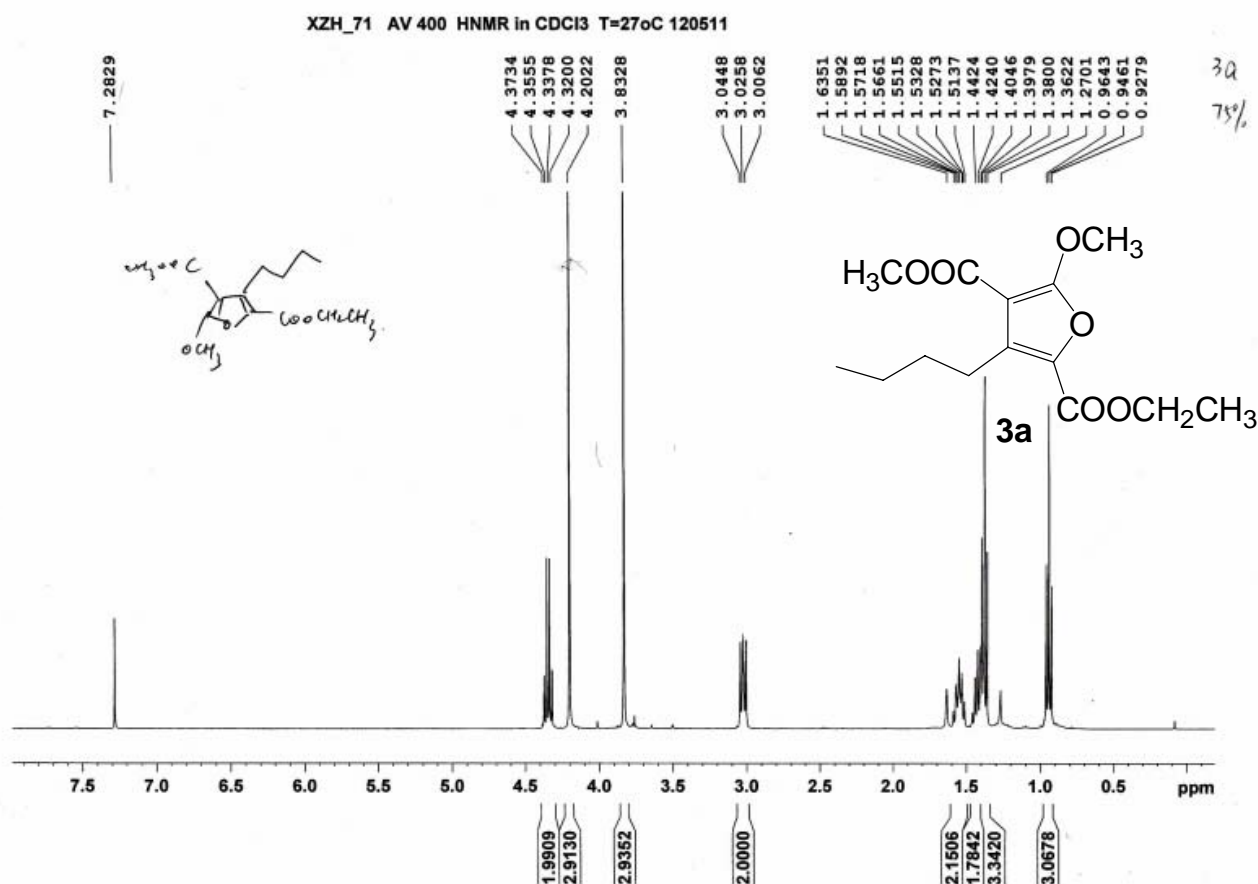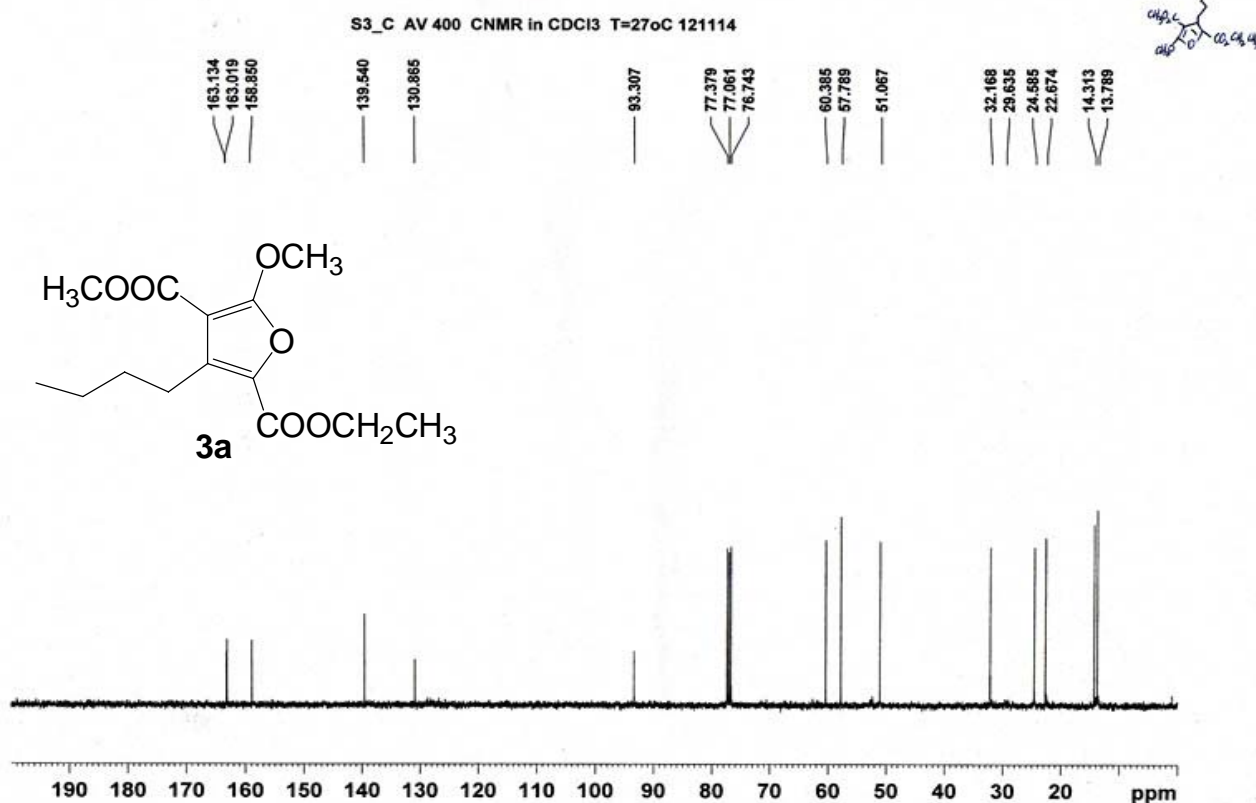

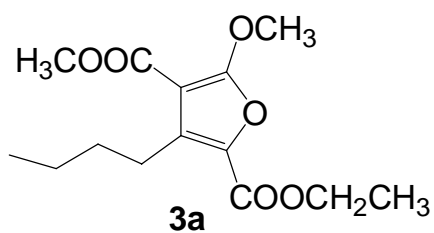

HRMS exact mass calcd for (C<sub>14</sub>H<sub>20</sub>O<sub>6</sub>+H) requires m/z 285.1333, found m/z 285.1354.

|               |                  |             |          |                 |              |                        |                       |
|---------------|------------------|-------------|----------|-----------------|--------------|------------------------|-----------------------|
| Sample Name   | 2012-1115-S3-C   | Position    | P1-E9    | Instrument Name | Instrument 1 | User Name              |                       |
| Inj Vol       | -1               | InjPosition |          | SampleType      | Sample       | IRM Calibration Status | Success               |
| Data Filename | 2012-1115-s3-c.d | ACQ Method  | 0319-1.m | Comment         |              | Acquired Time          | 11/15/2012 2:09:06 PM |

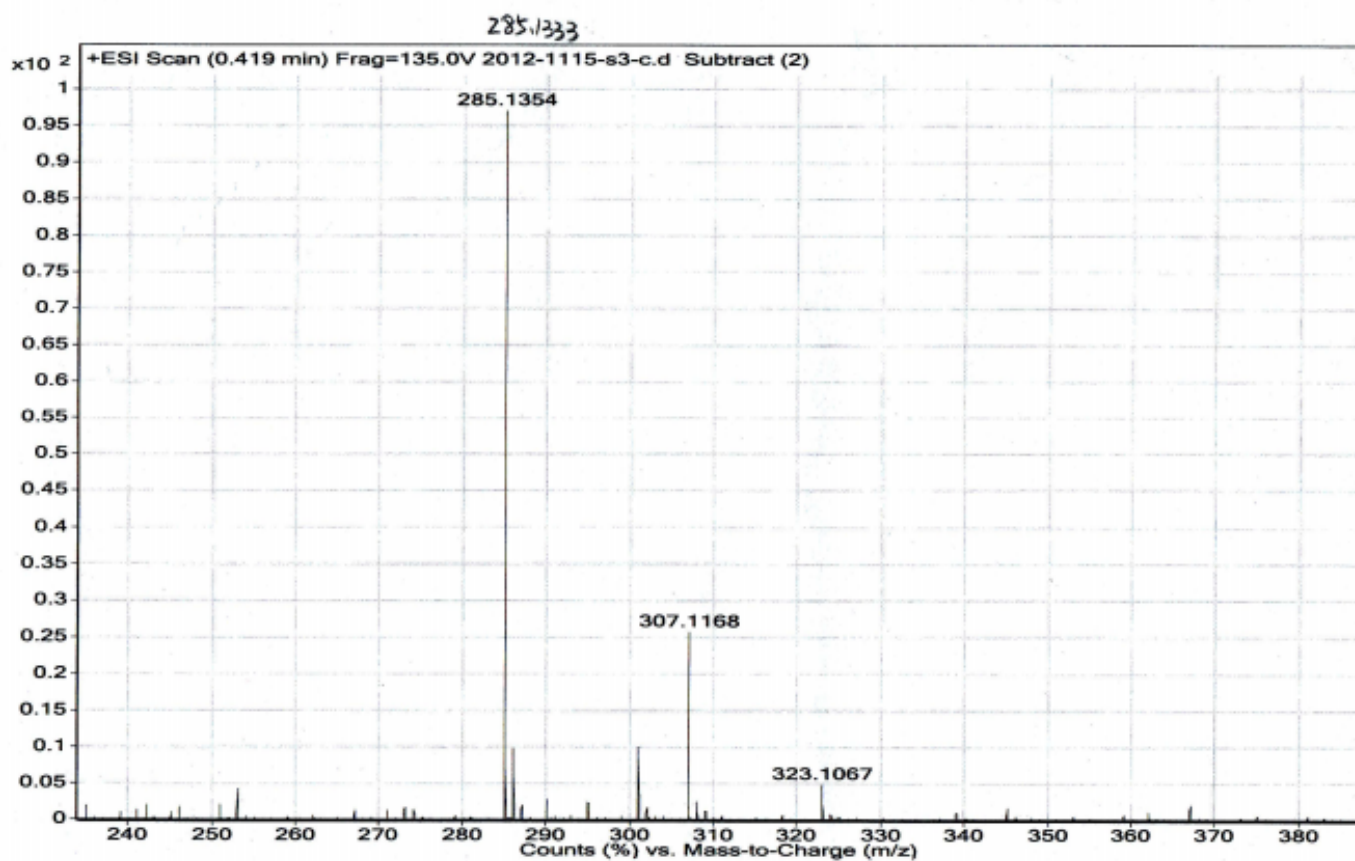

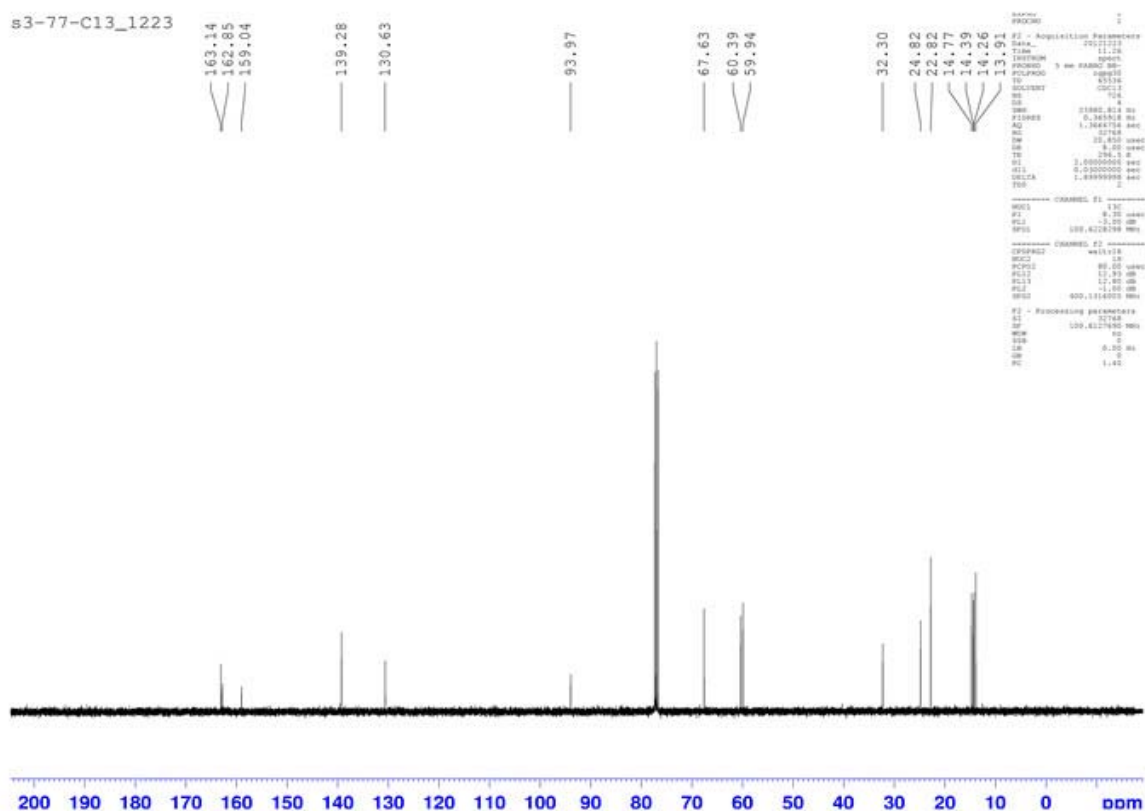

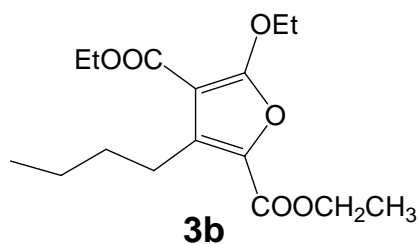

HRMS exact mass calcd for (C<sub>16</sub>H<sub>24</sub>O<sub>6</sub>+H) requires m/z 313.1646, found m/z 313.1644.

|                      |                 |                    |          |                        |              |                               |                        |
|----------------------|-----------------|--------------------|----------|------------------------|--------------|-------------------------------|------------------------|
| <b>Sample Name</b>   | 2012-1212-S77   | <b>Position</b>    | P1-D9    | <b>Instrument Name</b> | Instrument 1 | <b>User Name</b>              |                        |
| <b>Inj Vol</b>       | -1              | <b>InjPosition</b> |          | <b>SampleType</b>      | Sample       | <b>IRM Calibration Status</b> | Some Ions Missed       |
| <b>Data Filename</b> | 2012-1212-s77.d | <b>ACQ Method</b>  | 0319-1.m | <b>Comment</b>         |              | <b>Acquired Time</b>          | 12/12/2012 11:08:54 AM |

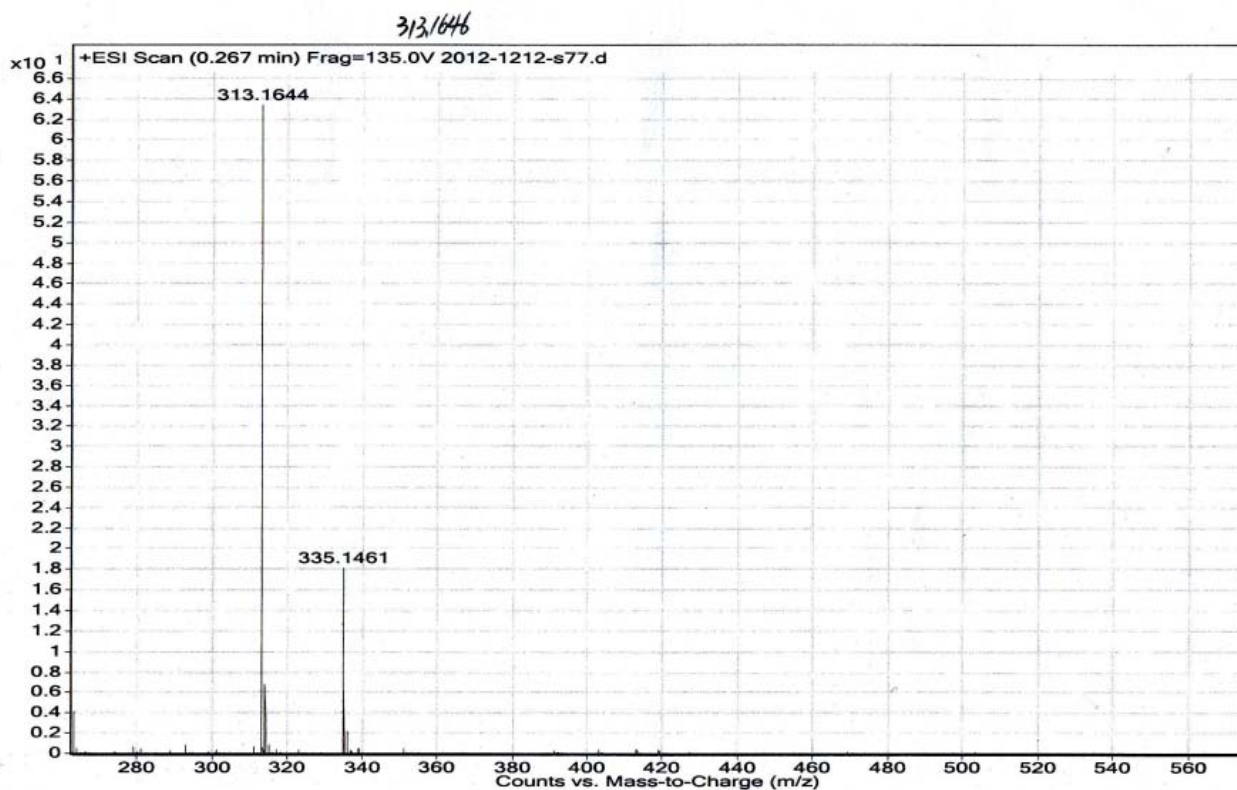

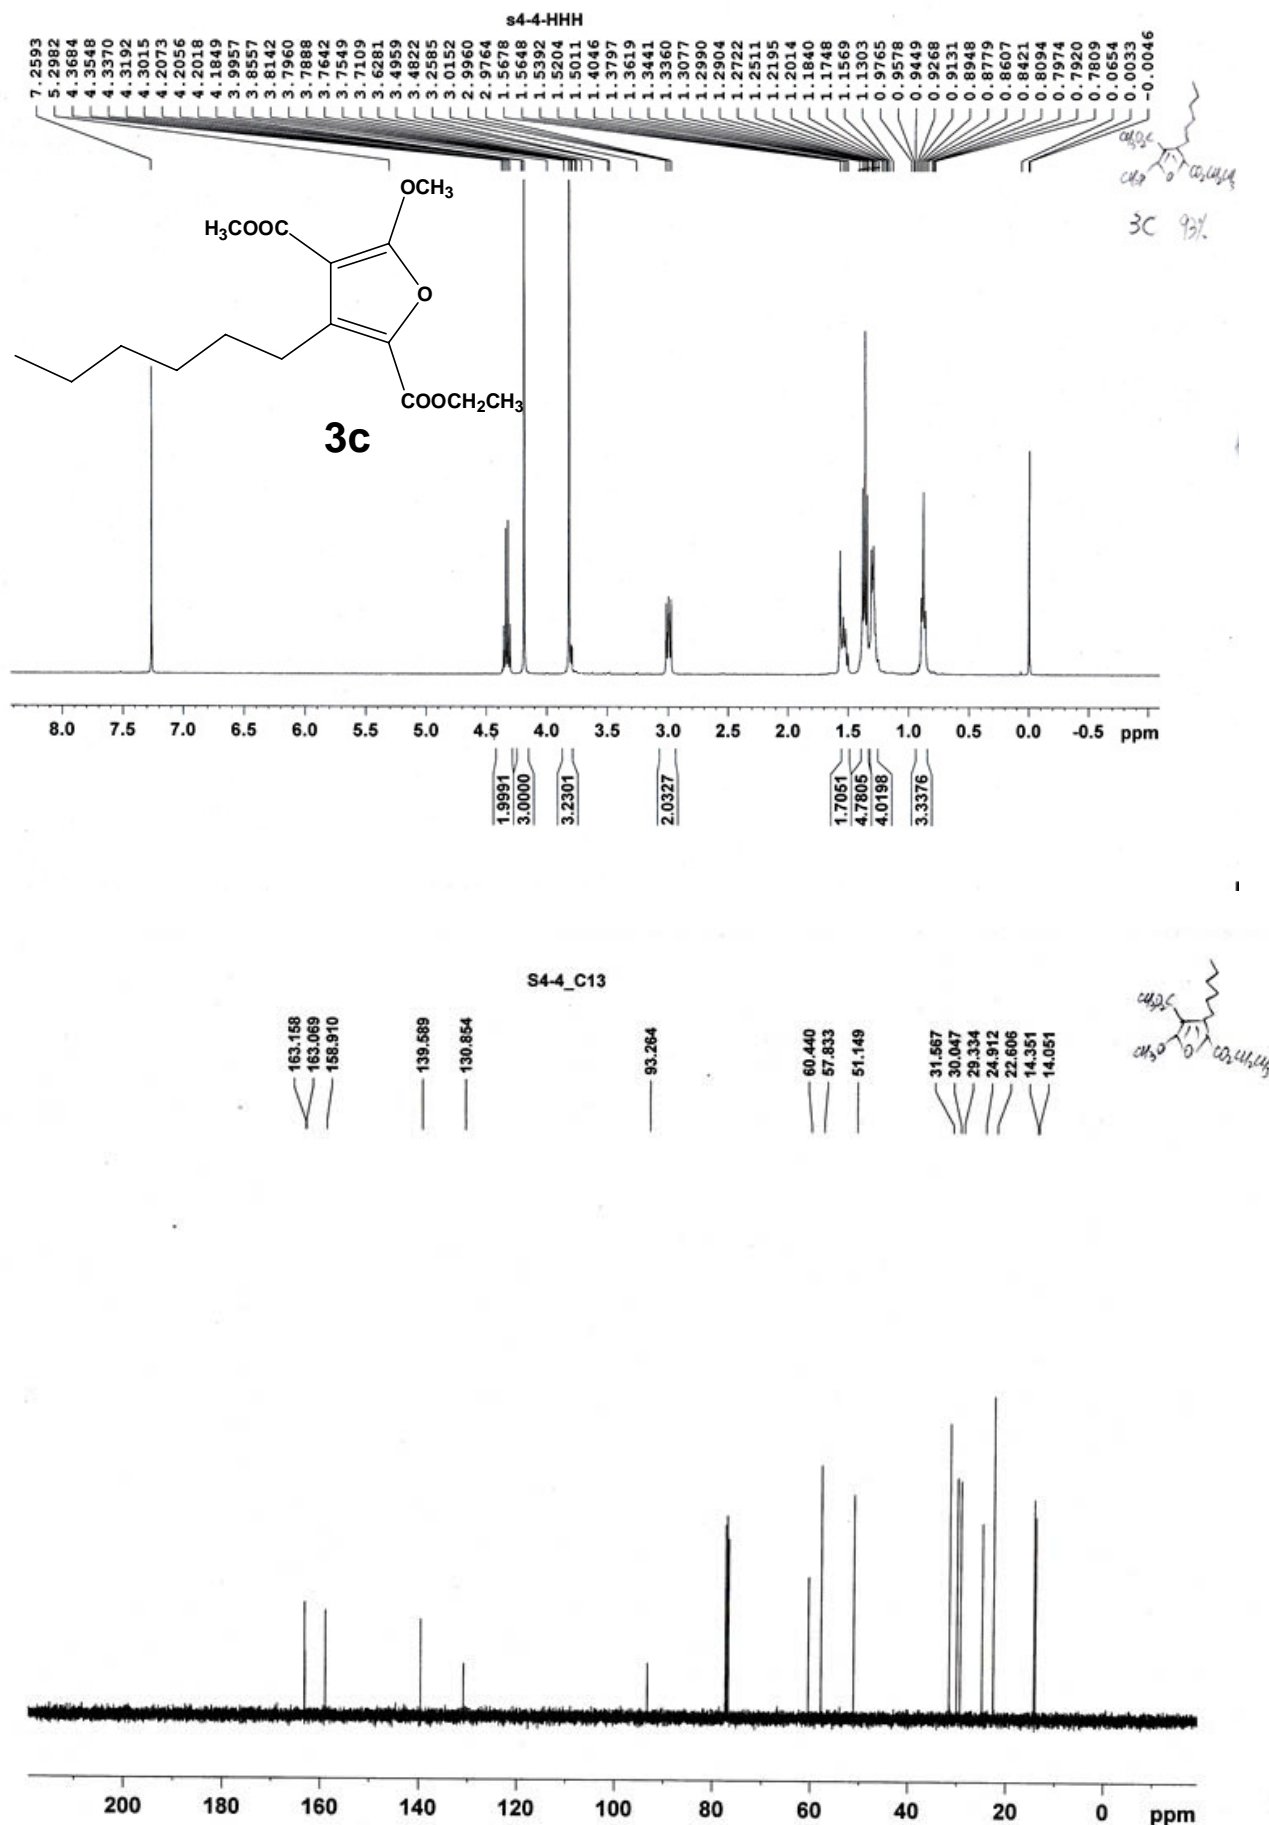



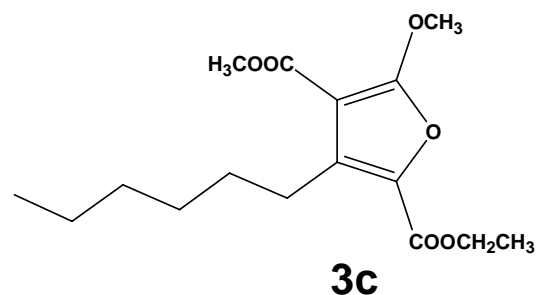

HRMS exact mass calcd for (C<sub>16</sub>H<sub>24</sub>O<sub>6</sub>+H) requires m/z 313.1646, found m/z 313.1643.

|               |                  |             |        |                 |              |                        |                     |
|---------------|------------------|-------------|--------|-----------------|--------------|------------------------|---------------------|
| Sample Name   | 2013-0104-s4-4   | Position    | P1-D9  | Instrument Name | Instrument 1 | User Name              |                     |
| Inj Vol       | -1               | InjPosition |        | SampleType      | Sample       | IRM Calibration Status | Success             |
| Data Filename | 2013-0104-s4-4.d | ACQ Method  | 0103.m | Comment         |              | Acquired Time          | 1/4/2013 2:15:32 PM |

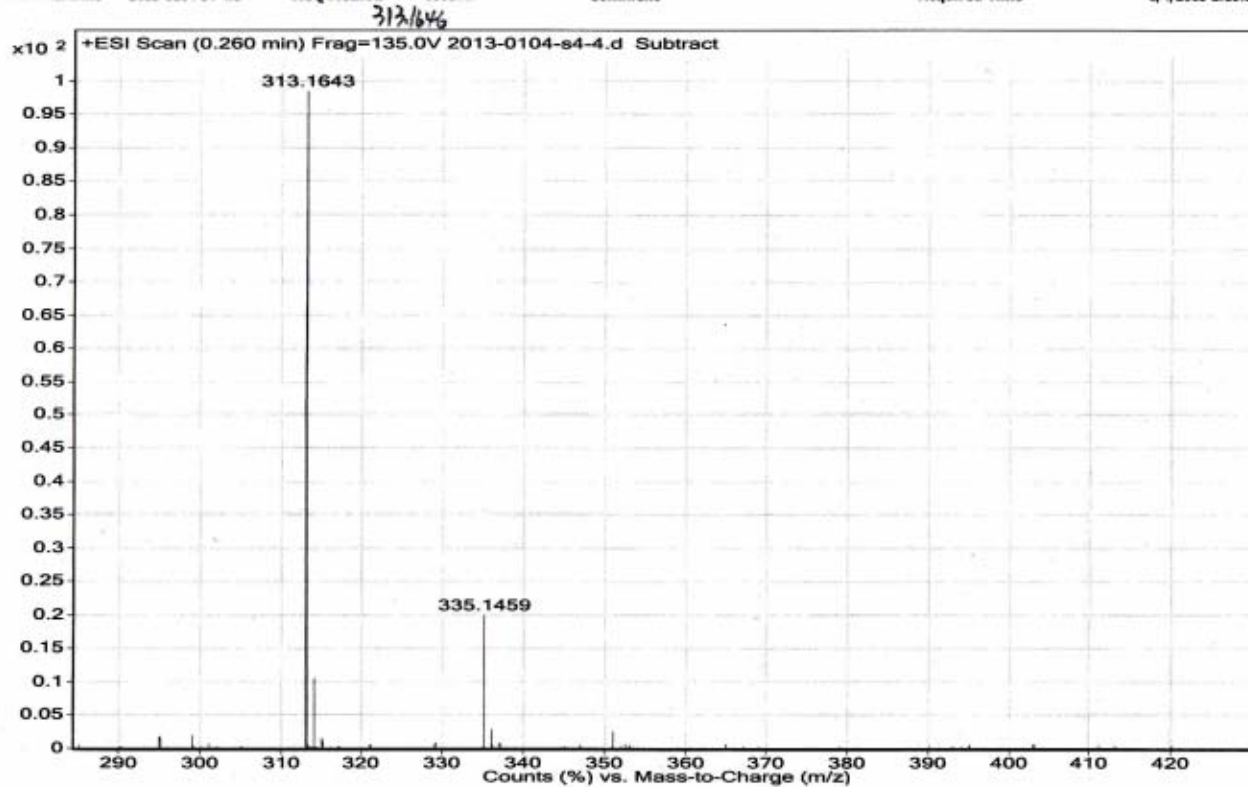



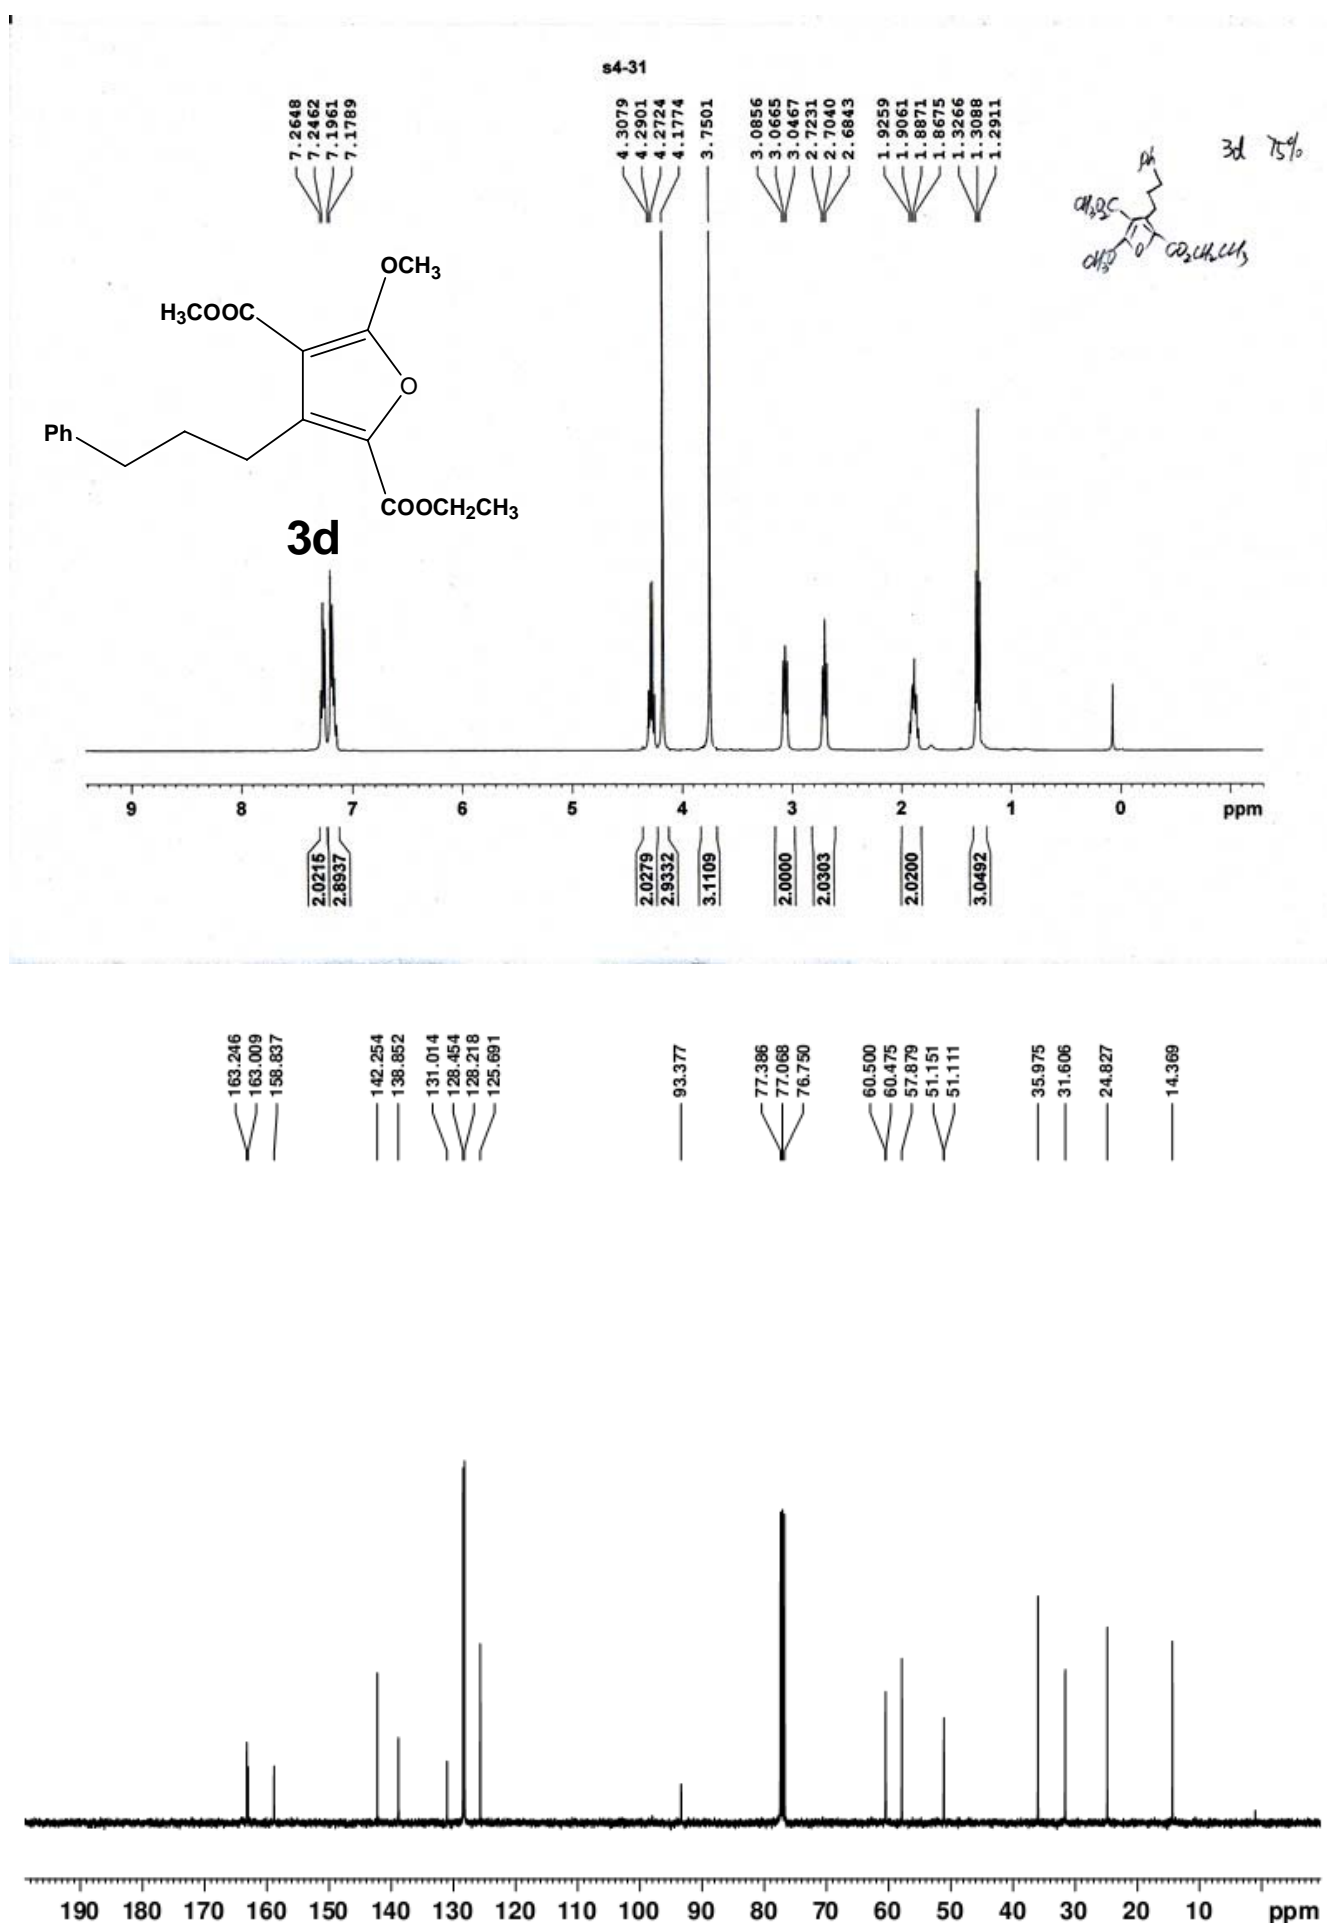

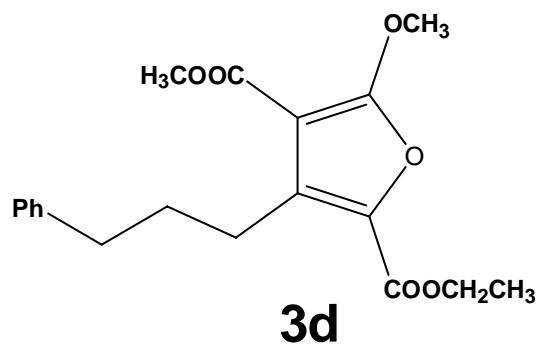

HRMS exact mass calcd for ( $C_{19}H_{22}O_6+H$ ) requires  $m/z$  347.1489, found  $m/z$  347.1495.

|               |                 |             |        |                 |              |                        |                     |
|---------------|-----------------|-------------|--------|-----------------|--------------|------------------------|---------------------|
| Sample Name   | 2013-0308-s31   | Position    | Vial 5 | Instrument Name | Instrument 1 | User Name              |                     |
| Inj Vol       | -1              | InjPosition |        | SampleType      | Sample       | IRM Calibration Status | Success             |
| Data Filename | 2013-0308-s31.d | ACQ Method  | 0103.m | Comment         |              | Acquired Time          | 3/8/2013 9:58:33 AM |

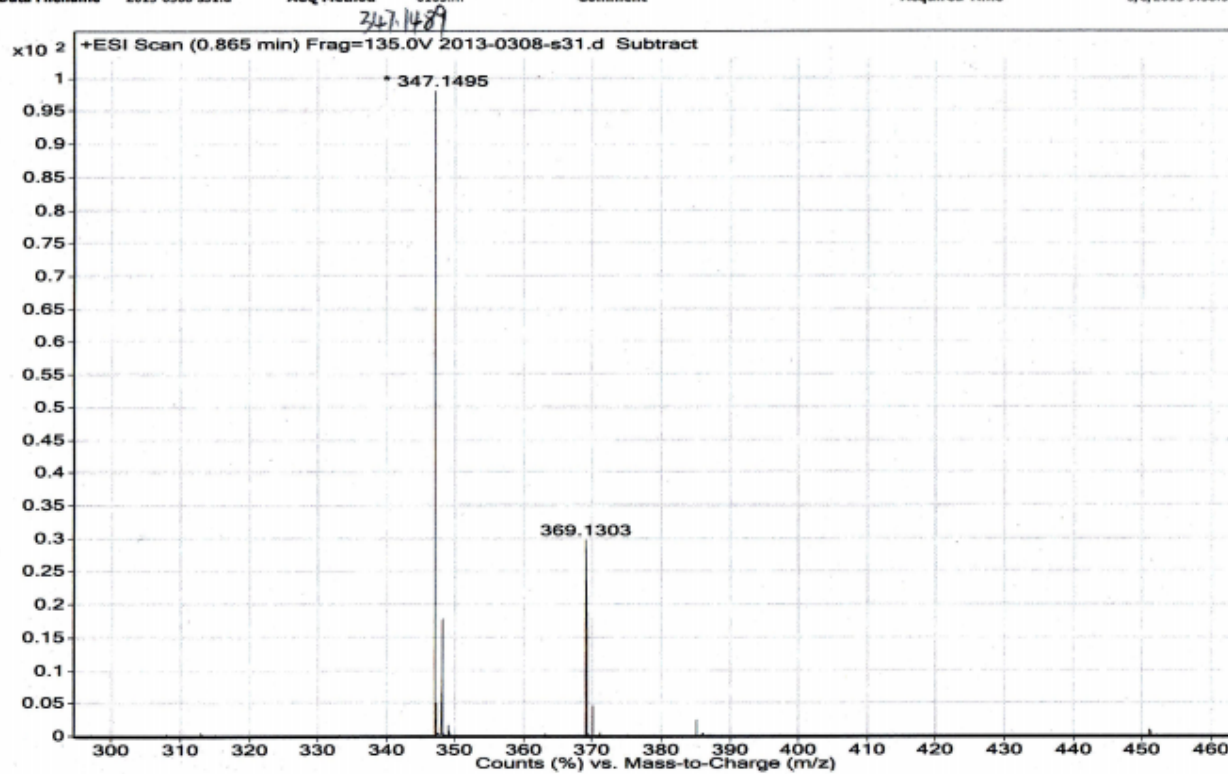

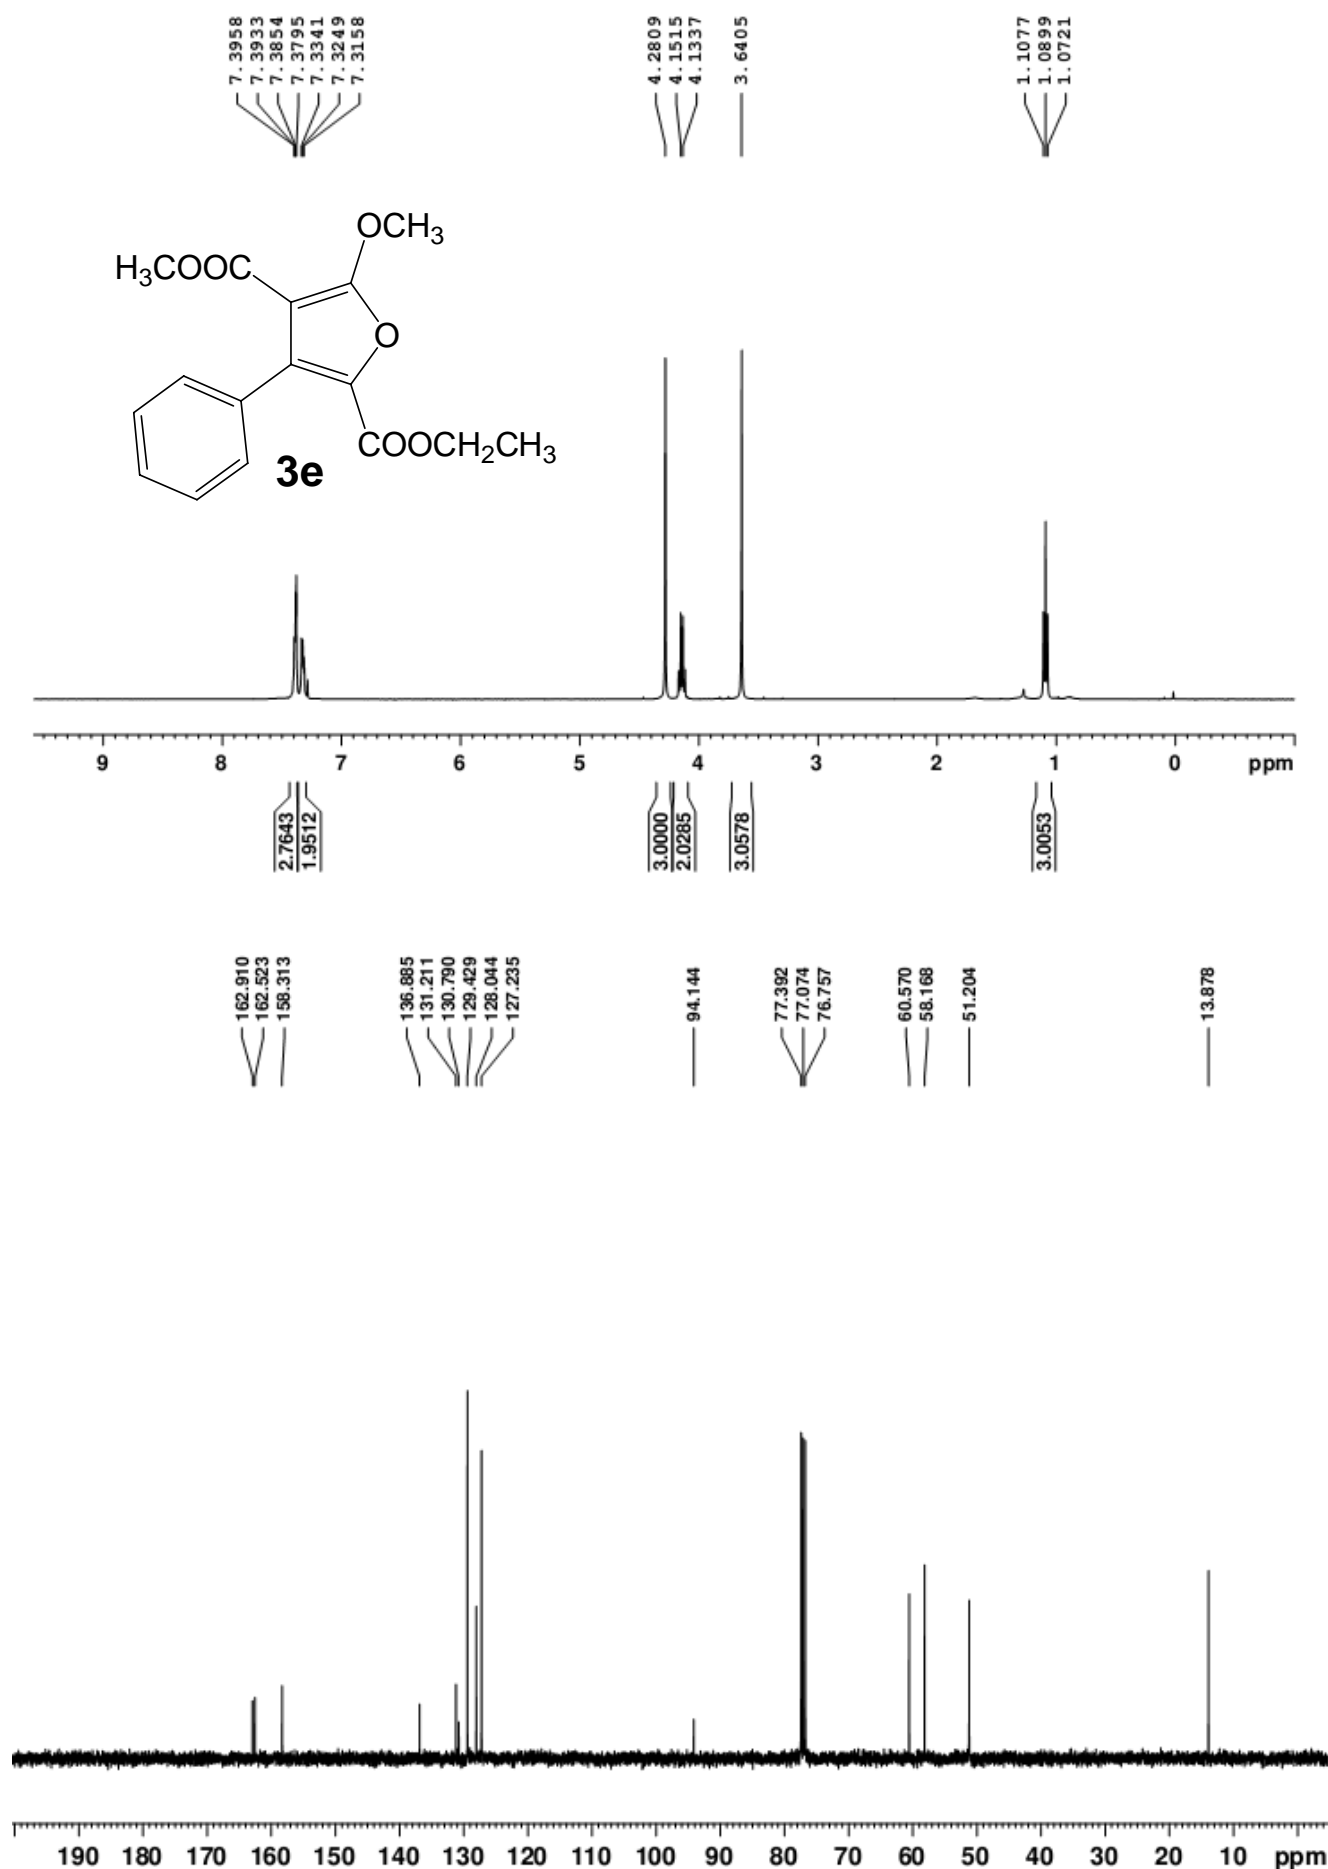

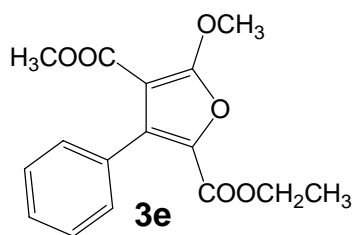

HRMS exact mass calcd for (C<sub>16</sub>H<sub>16</sub>O<sub>6</sub>+H) requires m/z 305.1020, found m/z 305.1027.

|               |                 |             |             |                 |                                   |                        |             |
|---------------|-----------------|-------------|-------------|-----------------|-----------------------------------|------------------------|-------------|
| Sample Name   | Unavailable     | Position    | Unavailable | Instrument Name | Unavailable                       | User Name              | Unavailable |
| Inj Vol       | Unavailable     | InjPosition | Unavailable | SampleType      | Unavailable                       | IRM Calibration Status | Success     |
| Data Filename | 2012-1219-s76.d | ACQ Method  |             | Comment         | Sample information is unavailable | Acquired Time          | Unavailable |

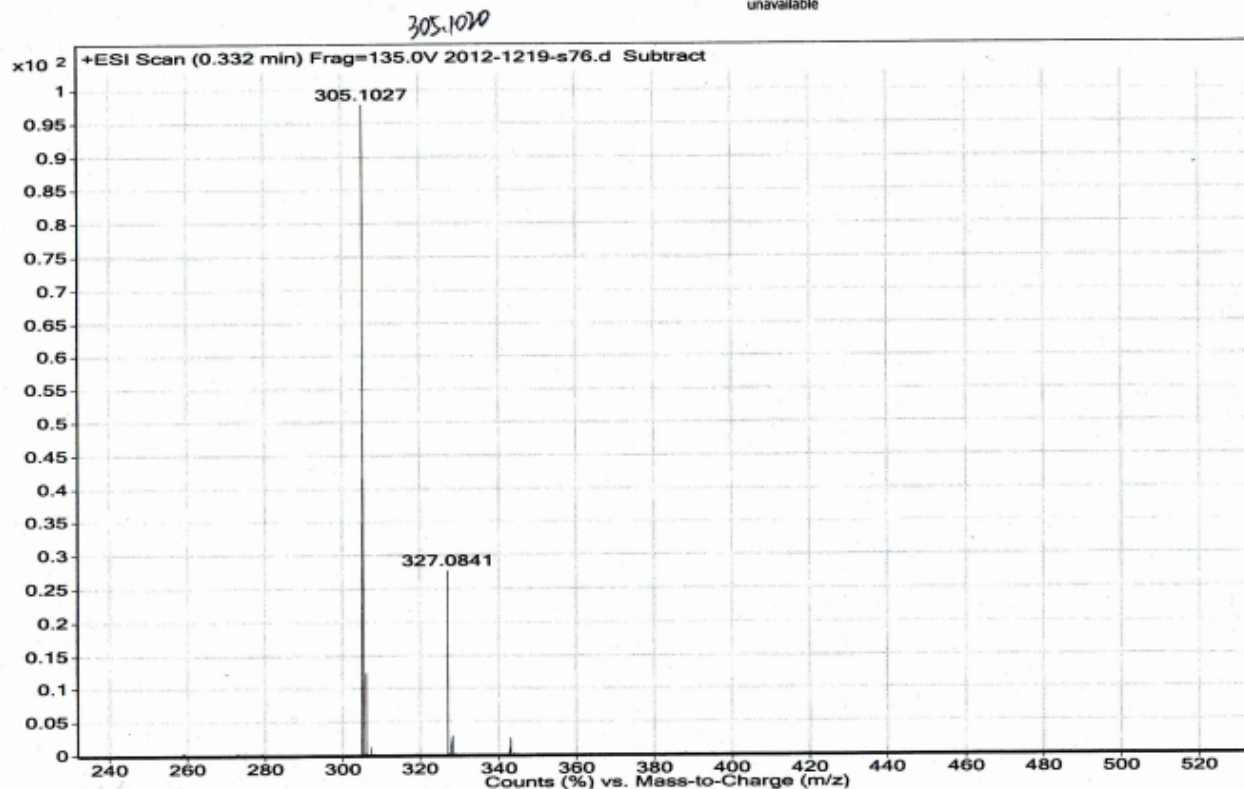

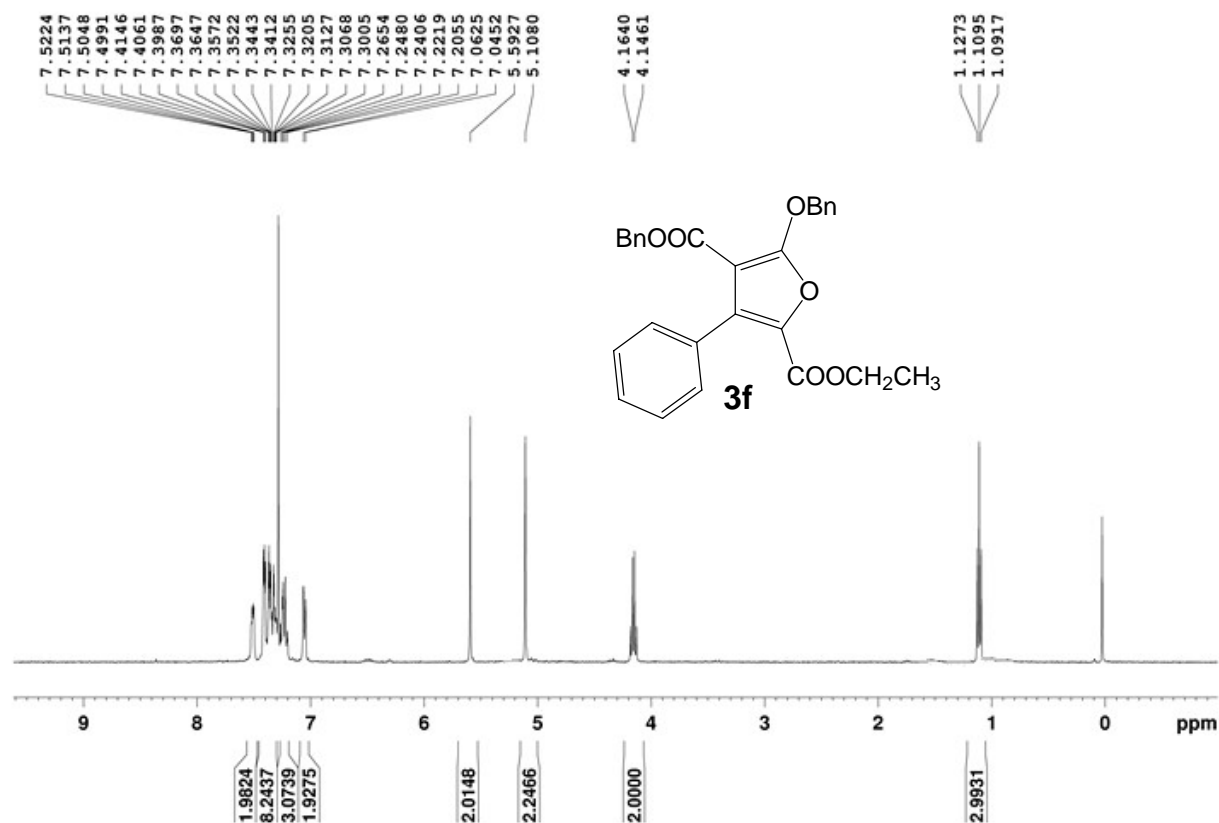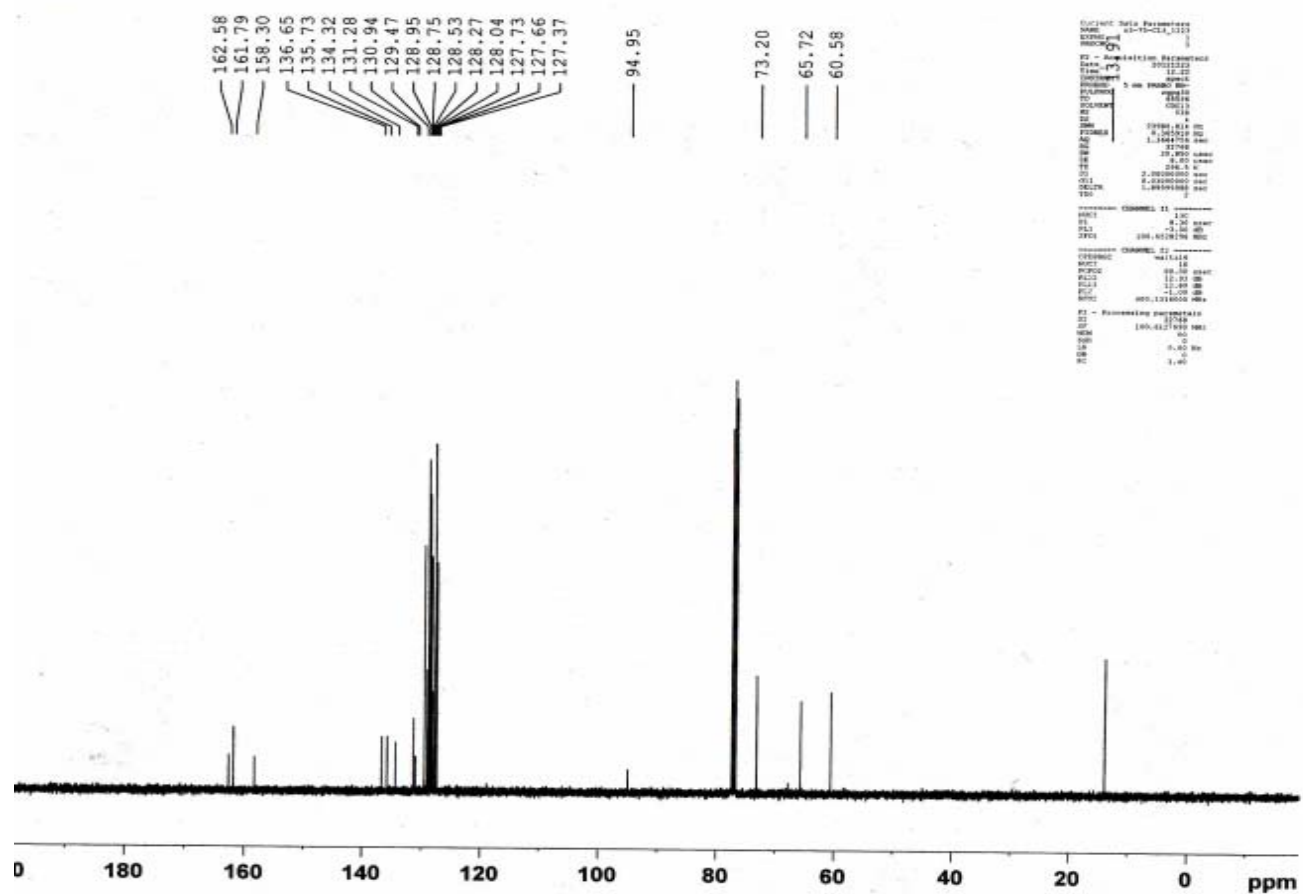

Current Data Parameters  
NAME: 43-75-23\_1113  
EXPNO: 1  
PROCNO: 1  
F2 - Acquisition Parameters  
Date\_YYMM: 20120222  
Time\_HHMM: 12:22  
INSTRUM: spect  
PROBHD: 5 mm QNP1H BBO  
PULPROG: zgpg30  
PC: zgpg30  
ACQNAME: 43-75-23\_1113  
F2 - Processing parameters  
SI: 32768  
SF: 400.142000 MHz  
WDW: EM  
SSB: 0  
LB: 3.00 Hz  
GB: 0  
PC: 1.40

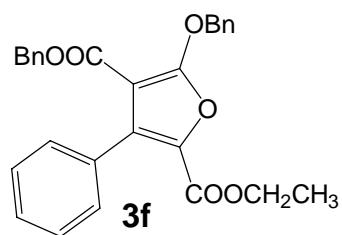

HRMS exact mass calcd for ( $C_{28}H_{24}O_6+H$ ) requires  $m/z$  457.1646, found  $m/z$  457.1641.

|                      |                 |                    |          |                        |              |                               |                        |
|----------------------|-----------------|--------------------|----------|------------------------|--------------|-------------------------------|------------------------|
| <b>Sample Name</b>   | 2012-1212-S75   | <b>Position</b>    | P1-F9    | <b>Instrument Name</b> | Instrument 1 | <b>User Name</b>              |                        |
| <b>Inj Vol</b>       | -1              | <b>InjPosition</b> |          | <b>SampleType</b>      | Sample       | <b>IRM Calibration Status</b> | Some Ions Missed       |
| <b>Data Filename</b> | 2012-1212-s75.d | <b>ACQ Method</b>  | 0319-1.m | <b>Comment</b>         |              | <b>Acquired Time</b>          | 12/12/2012 11:04:42 AM |

457.1646

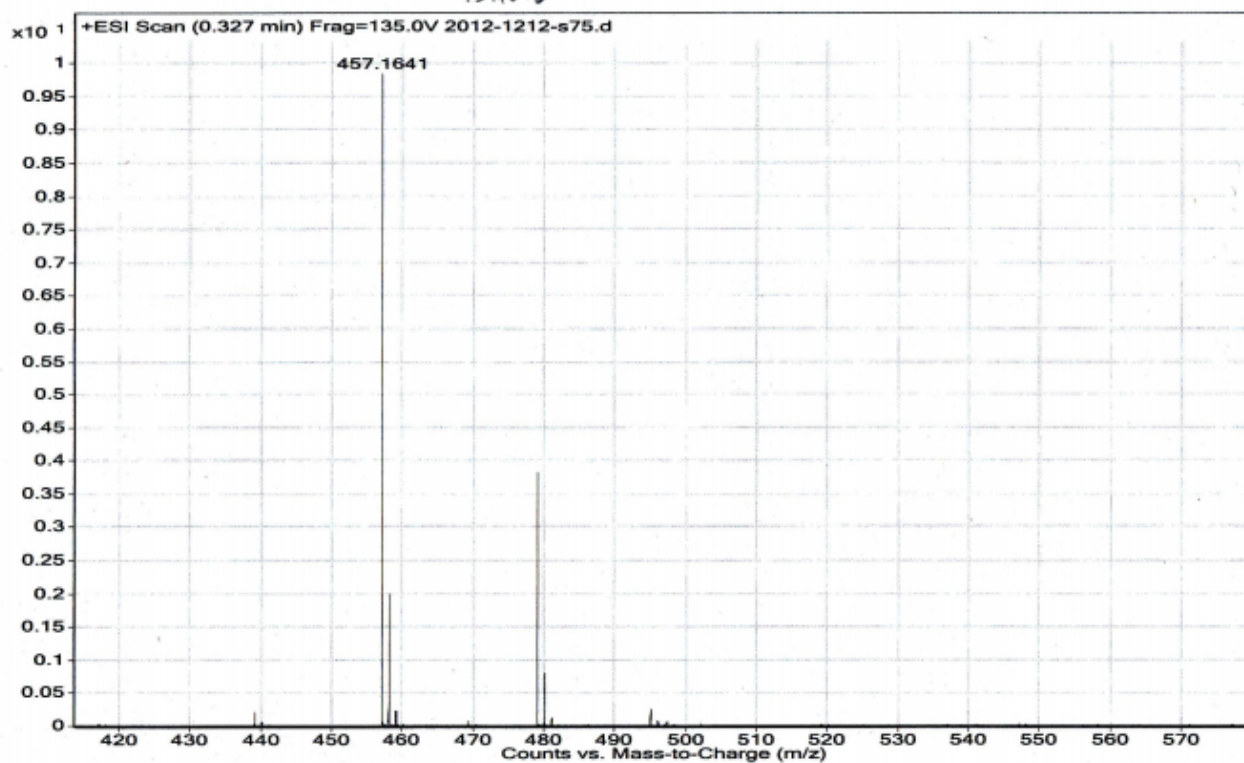

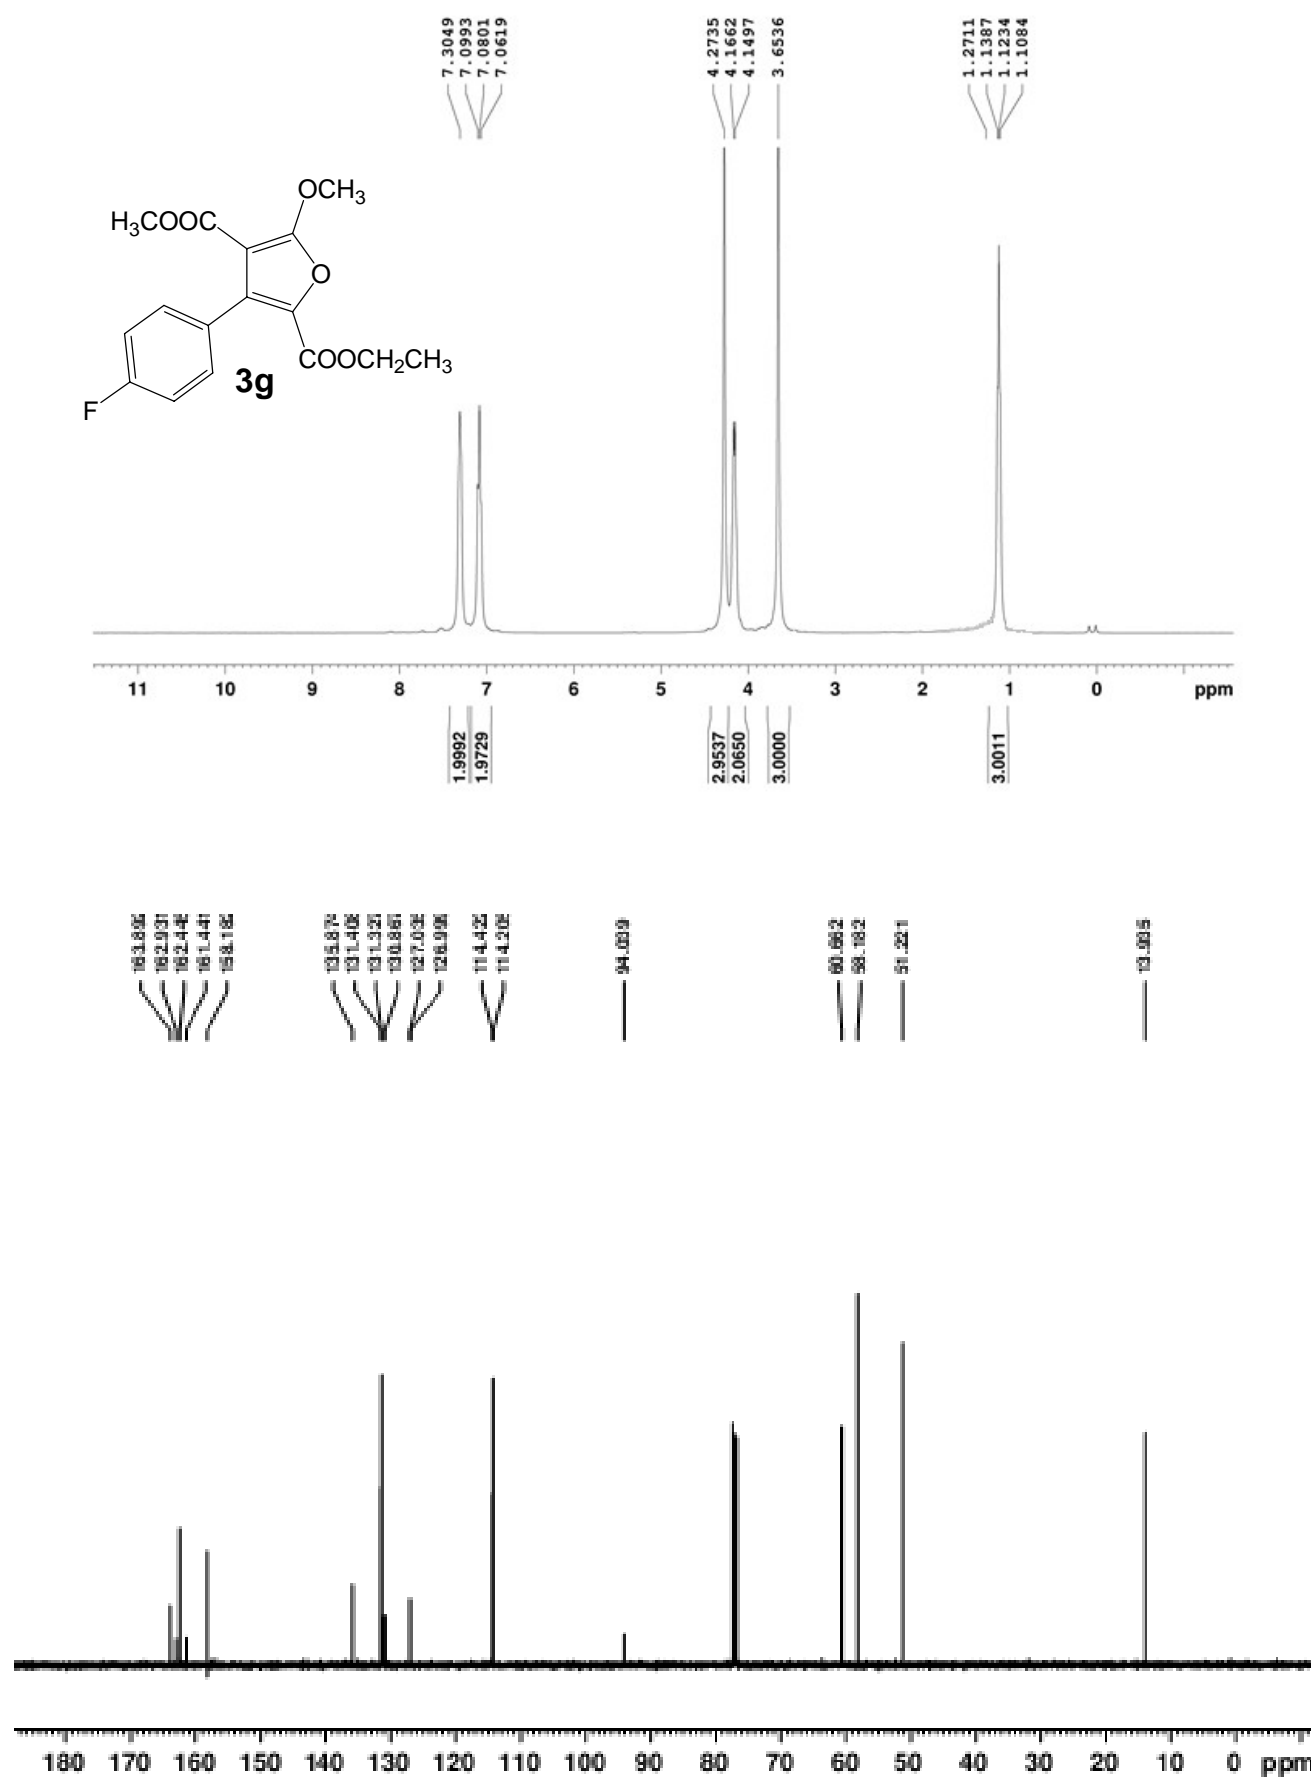



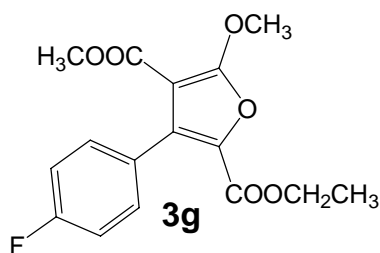

HRMS exact mass calcd for (C<sub>16</sub>H<sub>15</sub>O<sub>6</sub>F+H) requires m/z 323.0925, found m/z 323.0933.

|               |                 |             |             |                 |                                   |                        |             |
|---------------|-----------------|-------------|-------------|-----------------|-----------------------------------|------------------------|-------------|
| Sample Name   | Unavailable     | Position    | Unavailable | Instrument Name | Unavailable                       | User Name              | Unavailable |
| Inj Vol       | Unavailable     | InjPosition | Unavailable | SampleType      | Unavailable                       | IRM Calibration Status | Success     |
| Data Filename | 2012-1219-s81.d | ACQ Method  |             | Comment         | Sample information is unavailable | Acquired Time          | Unavailable |

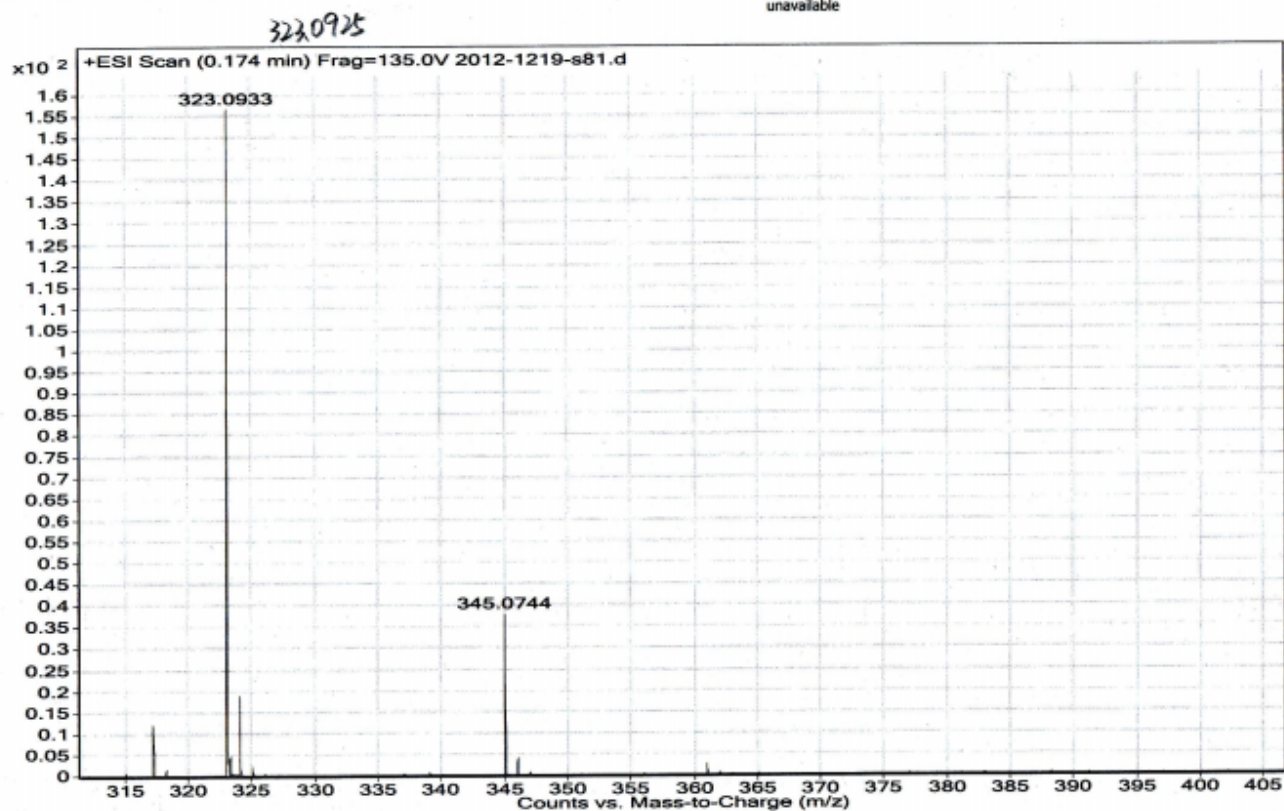



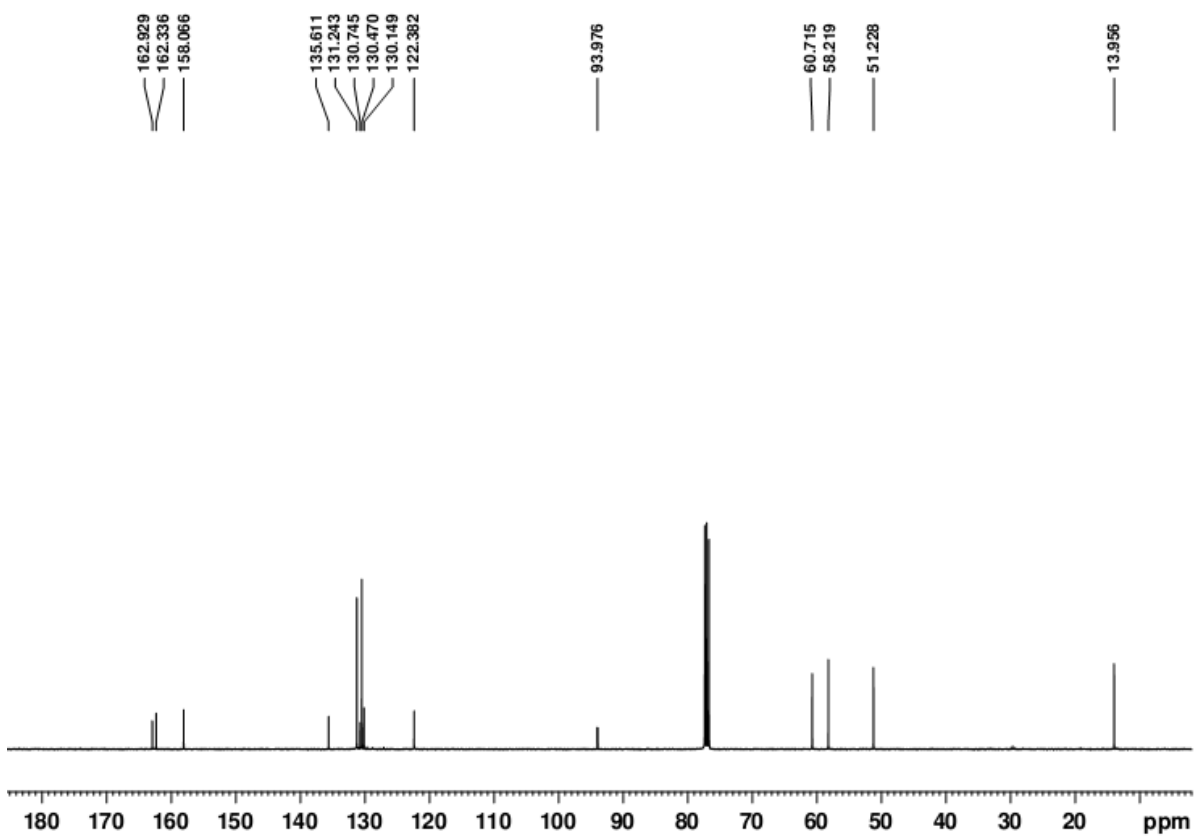

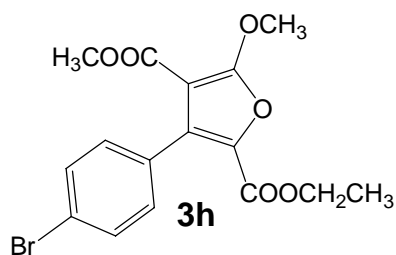

HRMS exact mass calcd for (C<sub>16</sub>H<sub>15</sub>O<sub>6</sub>Br+H) requires m/z 383.0125, found m/z 383.0134, 385.0114.

|               |                 |             |             |                 |                                   |                        |             |
|---------------|-----------------|-------------|-------------|-----------------|-----------------------------------|------------------------|-------------|
| Sample Name   | Unavailable     | Position    | Unavailable | Instrument Name | Unavailable                       | User Name              | Unavailable |
| Inj Vol       | Unavailable     | InjPosition | Unavailable | SampleType      | Unavailable                       | IRM Calibration Status | Success     |
| Data Filename | 2012-1219-s80.d | ACQ Method  |             | Comment         | Sample information is unavailable | Acquired Time          | Unavailable |

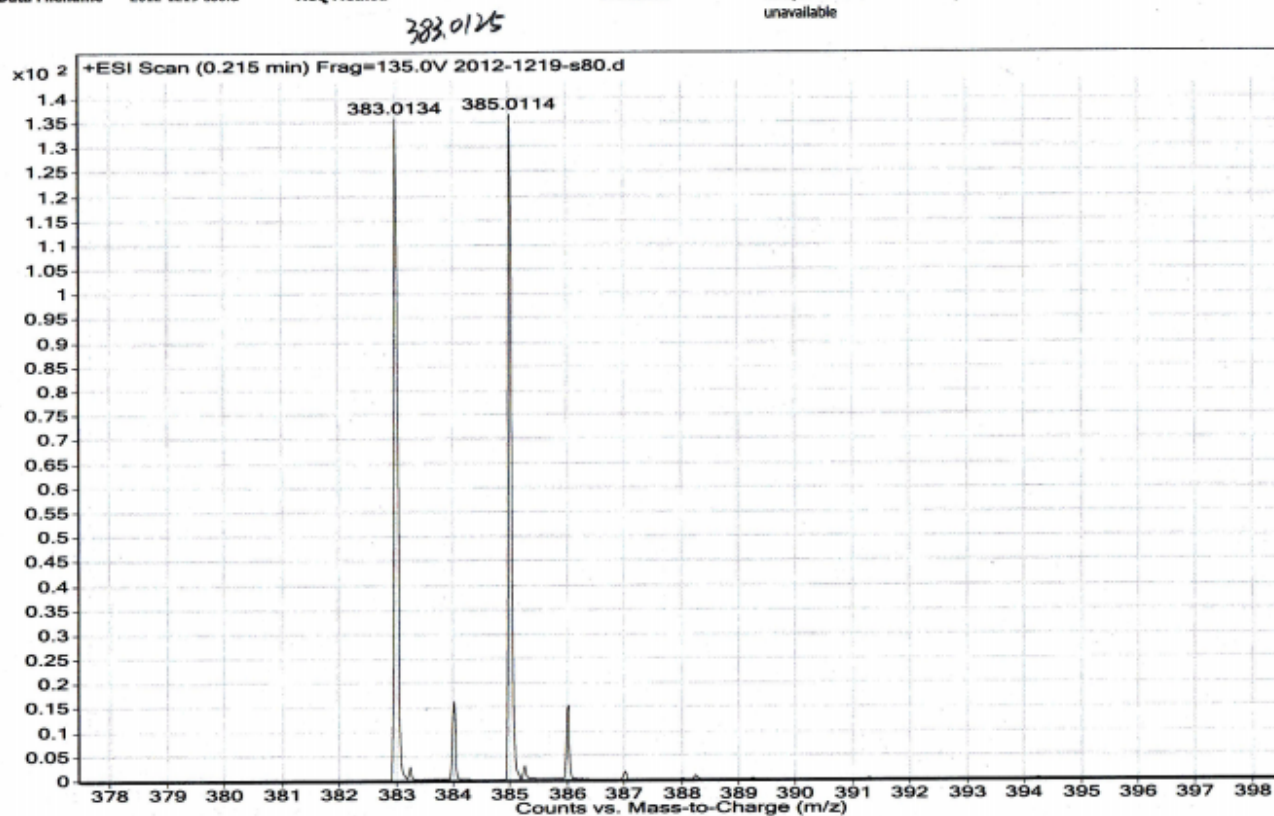

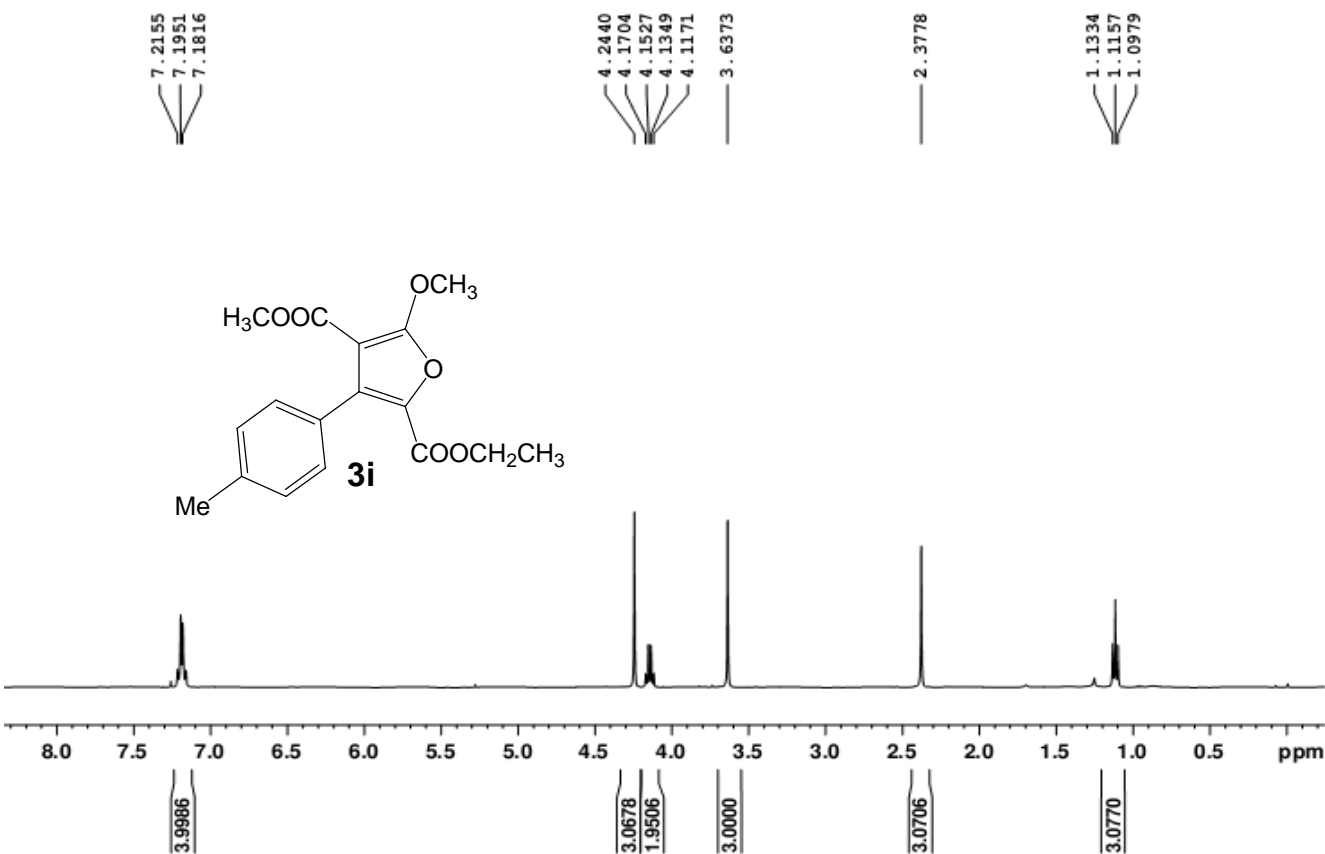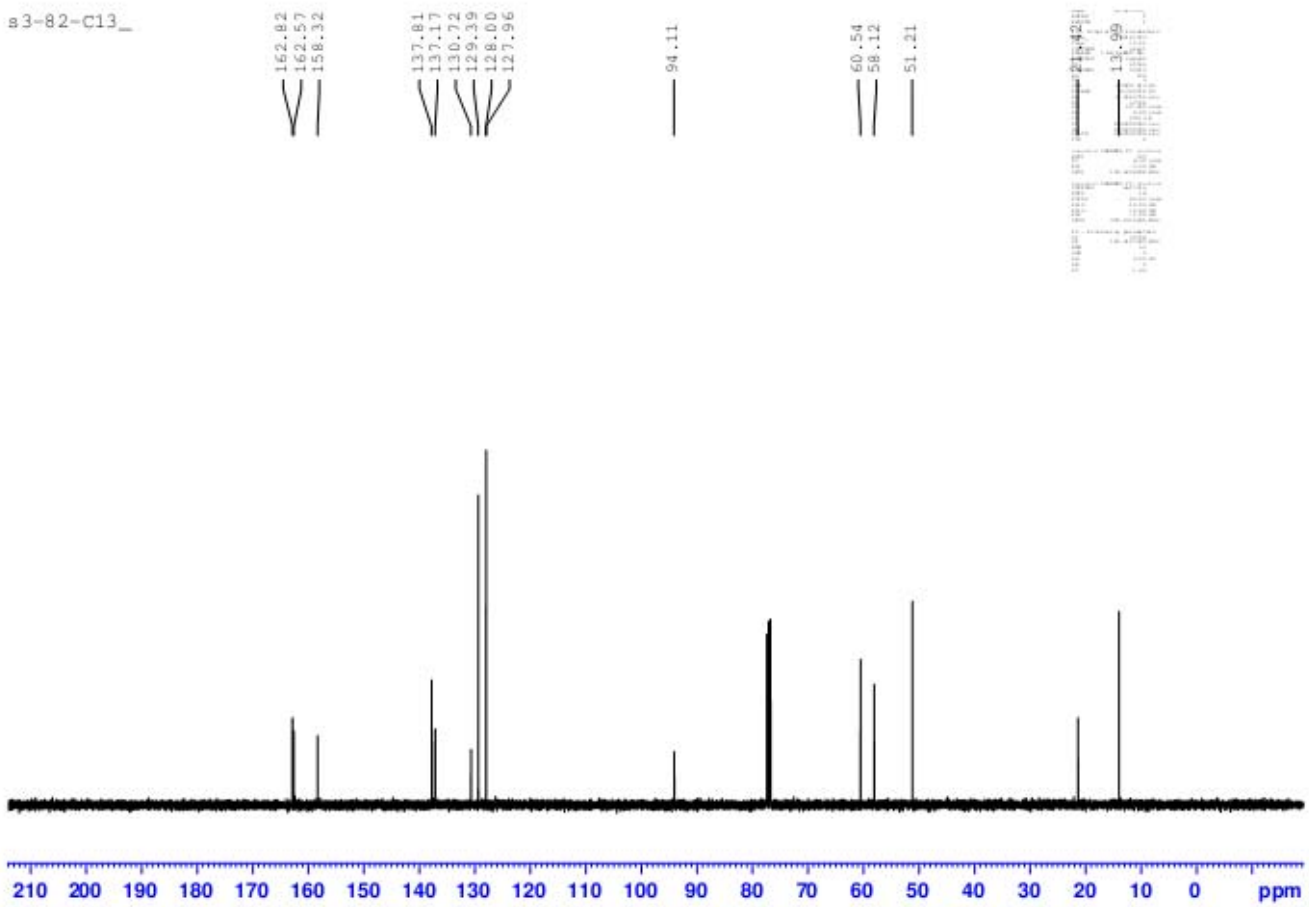

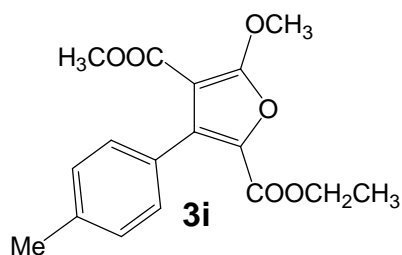

HRMS exact mass calcd for (C<sub>17</sub>H<sub>18</sub>O<sub>6</sub>+Na) requires m/z 319.1176, found m/z 319.1173.

|               |                 |             |          |                 |              |                        |                        |
|---------------|-----------------|-------------|----------|-----------------|--------------|------------------------|------------------------|
| Sample Name   | 2012-1224-S82   | Position    | P1-F9    | Instrument Name | Instrument 1 | User Name              |                        |
| Inj Vol       | -1              | InjPosition |          | SampleType      | Sample       | IRM Calibration Status | Success                |
| Data Filename | 2012-1224-s82.d | ACQ Method  | 0319-1.m | Comment         |              | Acquired Time          | 12/24/2012 11:19:01 AM |

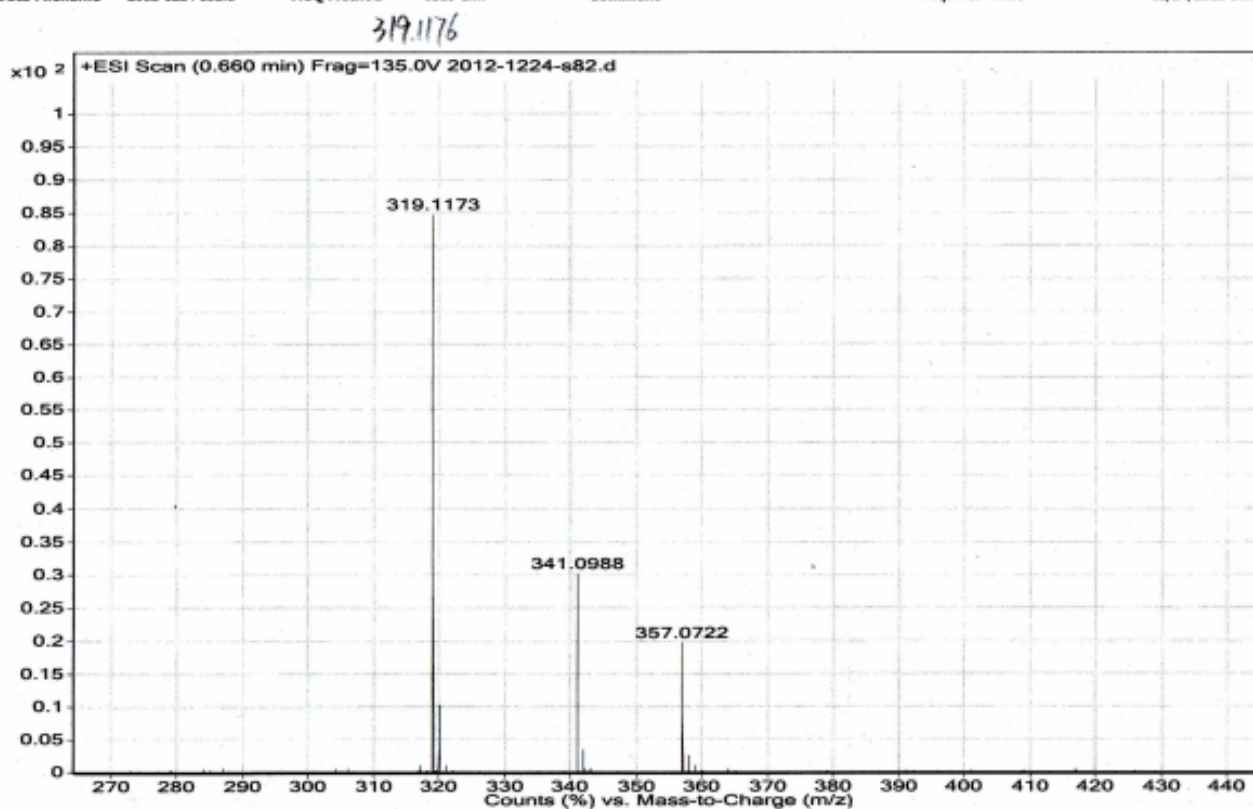

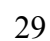

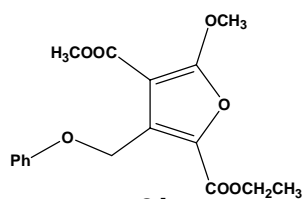

**3j**

HRMS exact mass calcd for (C<sub>17</sub>H<sub>18</sub>O<sub>7</sub>+H) requires m/z 335.1125, found m/z 335.1132.

|               |                 |             |             |                 |                                   |                        |             |
|---------------|-----------------|-------------|-------------|-----------------|-----------------------------------|------------------------|-------------|
| Sample Name   | Unavailable     | Position    | Unavailable | Instrument Name | Unavailable                       | User Name              | Unavailable |
| Inj Vol       | Unavailable     | InjPosition | Unavailable | SampleType      | Unavailable                       | IRM Calibration Status | Success     |
| Data Filename | 2012-1224-s83.d | ACQ Method  |             | Comment         | Sample information is unavailable | Acquired Time          | Unavailable |

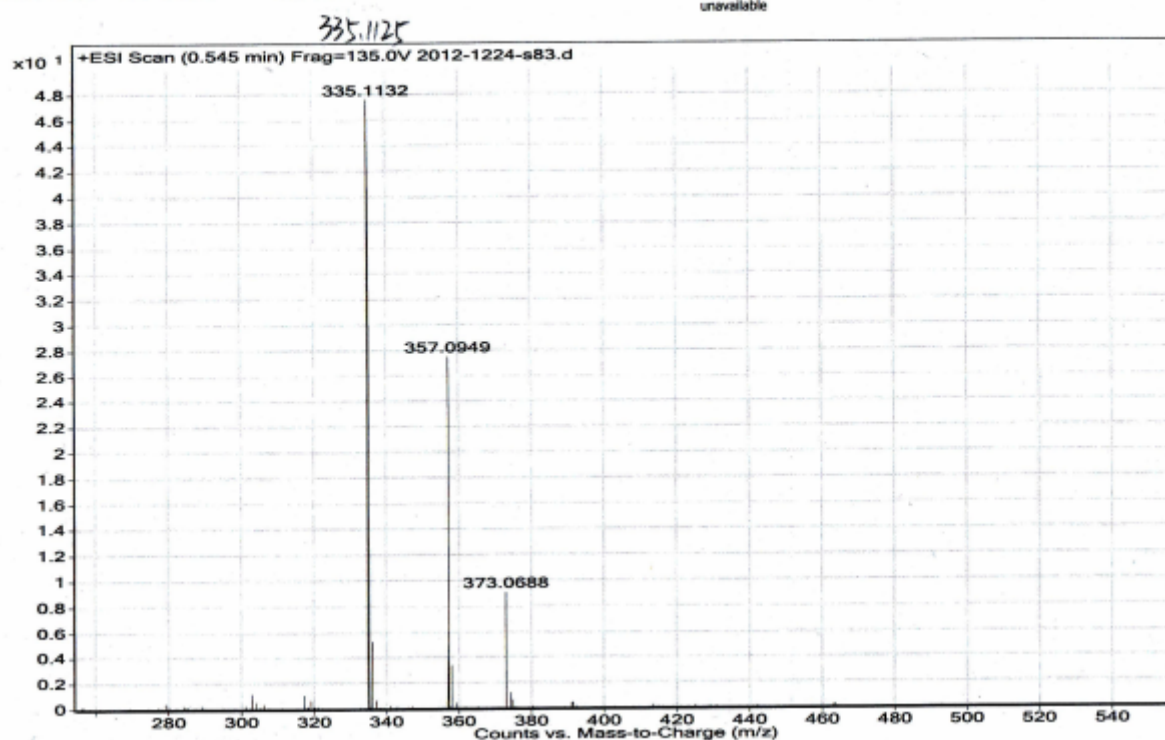

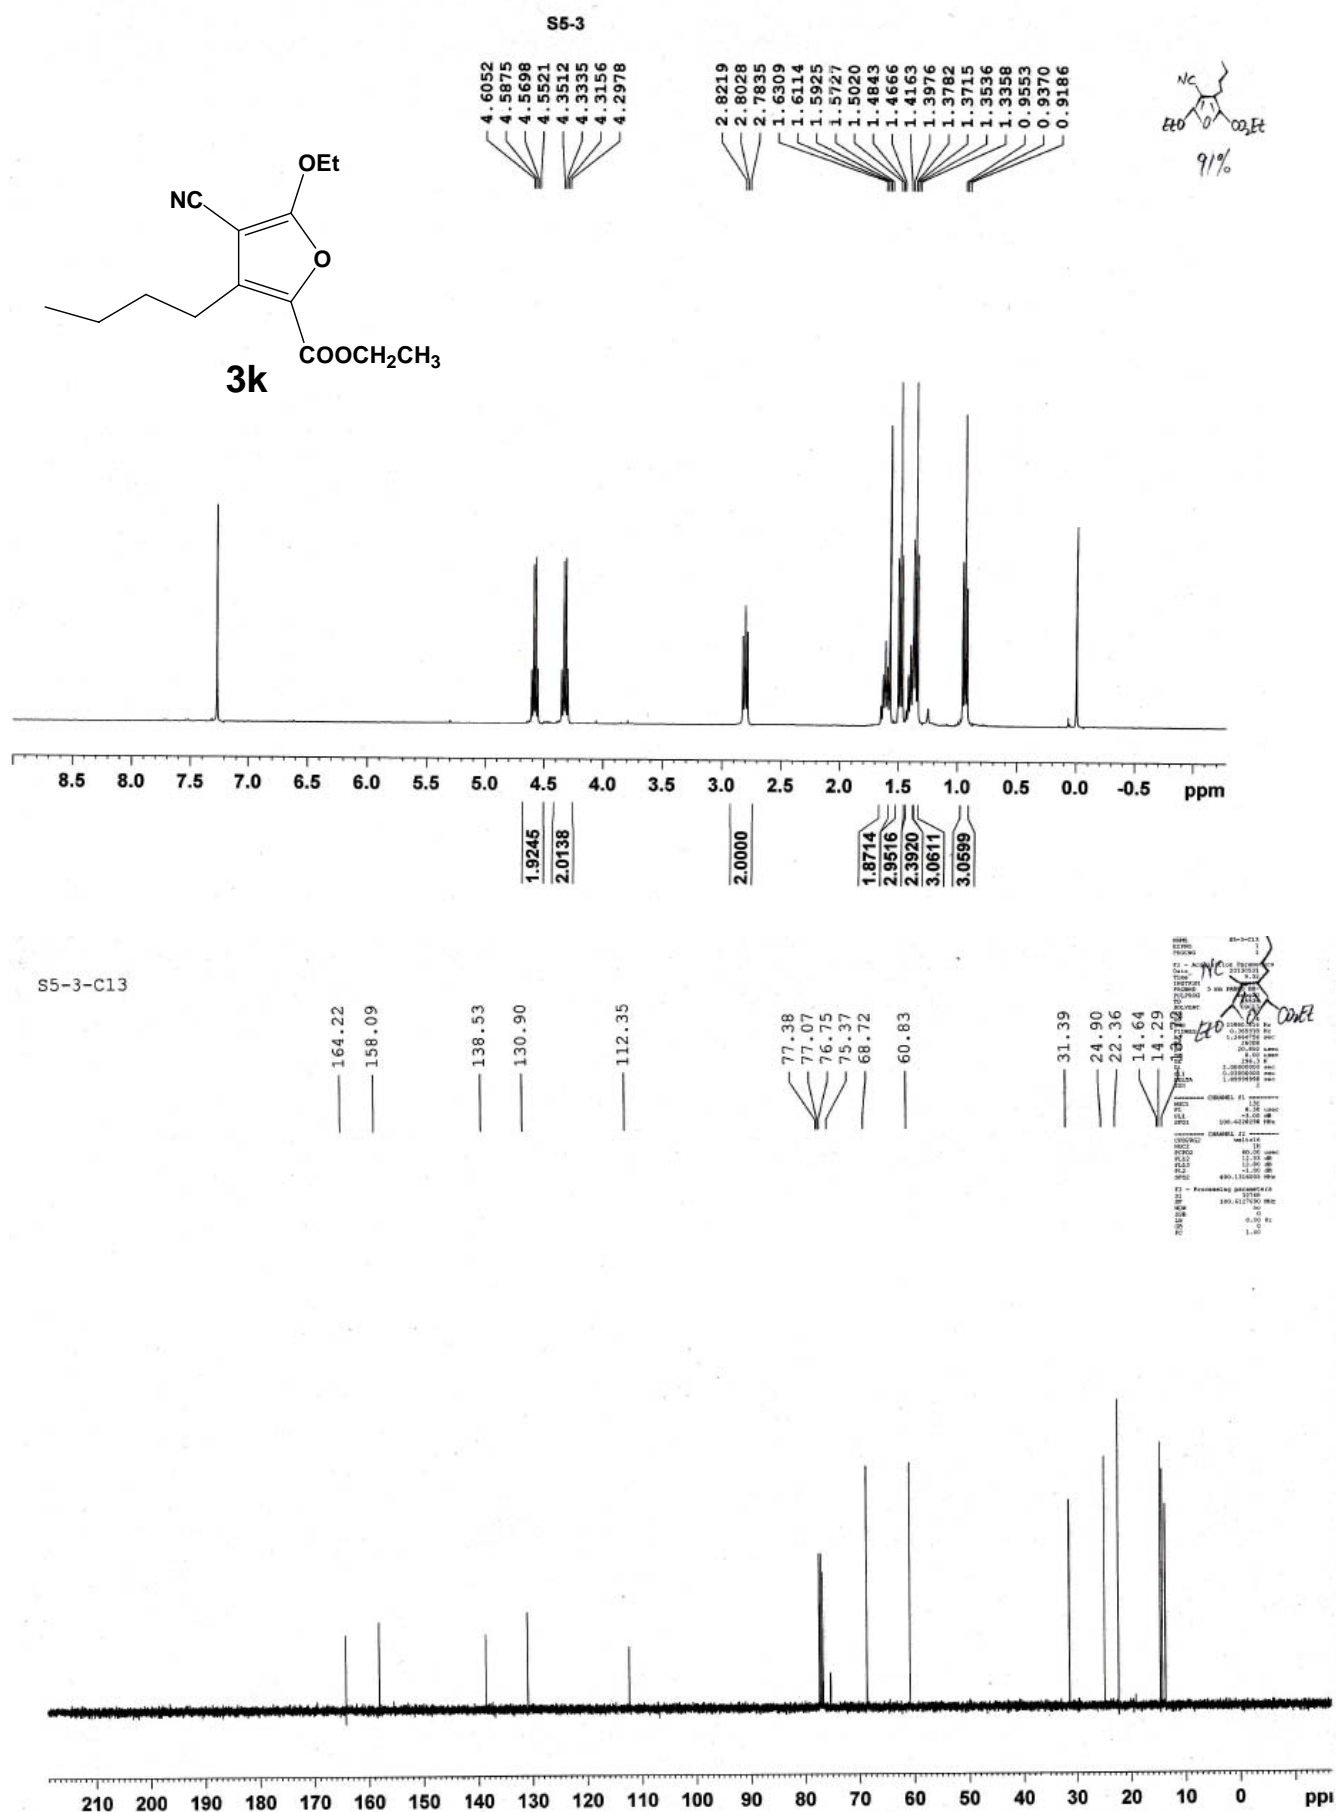



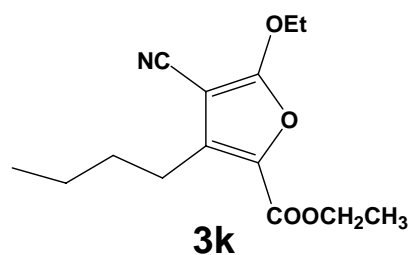

HRMS exact mass calcd for (C<sub>14</sub>H<sub>29</sub>O<sub>4</sub>N+H) requires m/z 266.1387, found m/z 266.1379.

|               |                  |             |             |                 |                                   |                        |             |
|---------------|------------------|-------------|-------------|-----------------|-----------------------------------|------------------------|-------------|
| Sample Name   | Unavailable      | Position    | Unavailable | Instrument Name | Unavailable                       | User Name              | Unavailable |
| Inj Vol       | Unavailable      | InjPosition | Unavailable | SampleType      | Unavailable                       | IRM Calibration Status | Success     |
| Data Filename | 2013-0604-s5-3.d | ACQ Method  |             | Comment         | Sample information is unavailable | Acquired Time          | Unavailable |

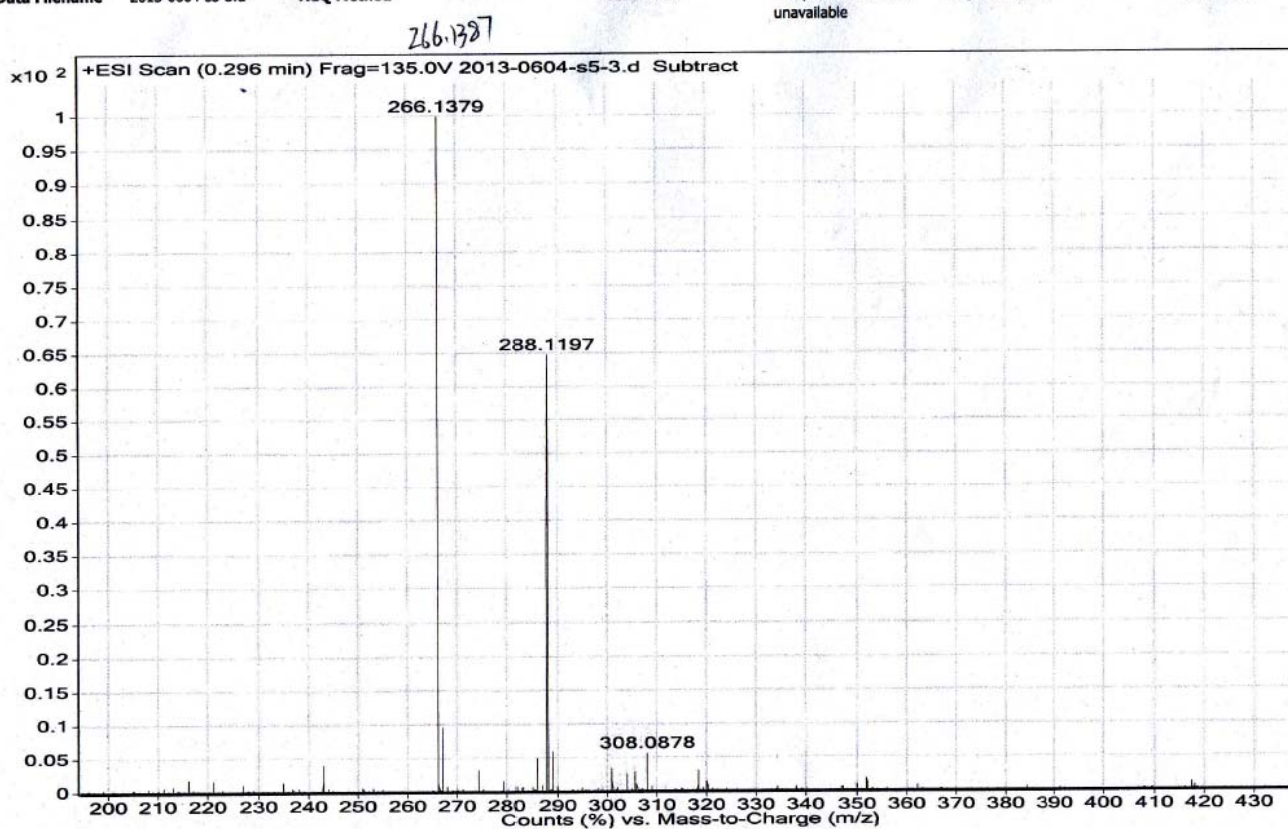



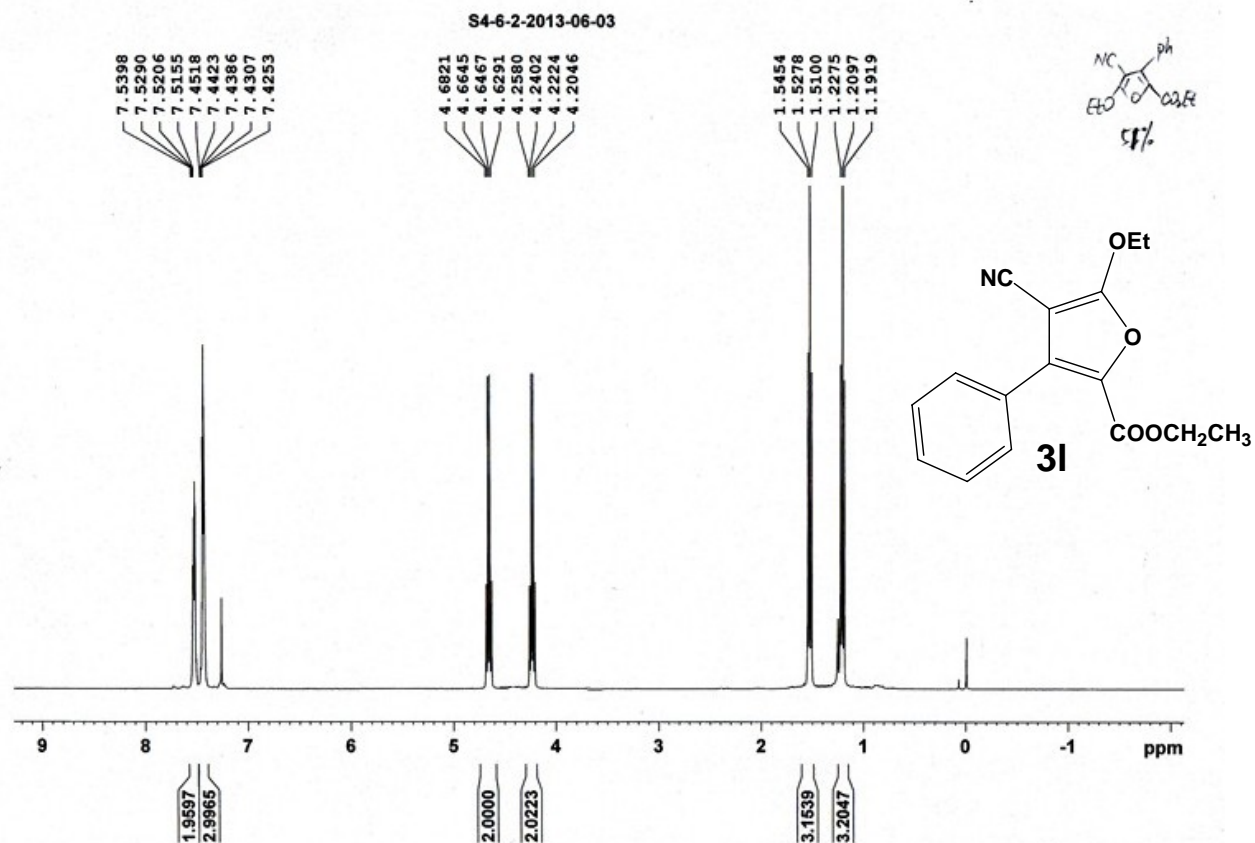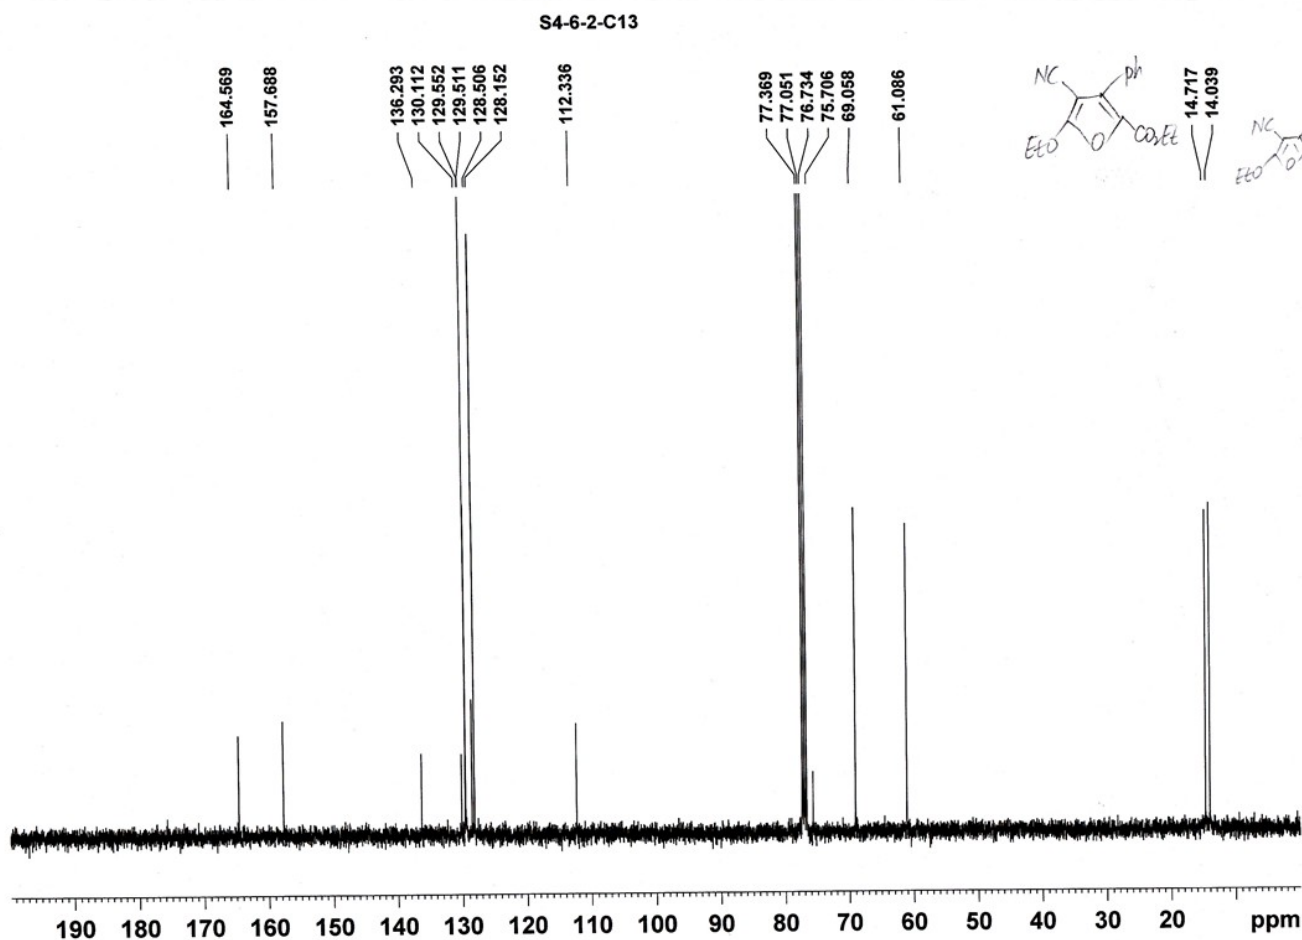

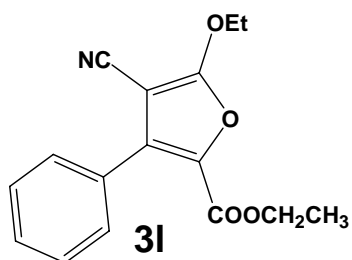

HRMS exact mass calcd for (C<sub>16</sub>H<sub>15</sub>O<sub>4</sub>N+H) requires m/z 286.1074, found m/z 286.1077.

|               |                    |             |             |                 |                                   |                        |             |
|---------------|--------------------|-------------|-------------|-----------------|-----------------------------------|------------------------|-------------|
| Sample Name   | Unavailable        | Position    | Unavailable | Instrument Name | Unavailable                       | User Name              | Unavailable |
| Inj Vol       | Unavailable        | InjPosition | Unavailable | SampleType      | Unavailable                       | IRM Calibration Status | Success     |
| Data Filename | 2013-0604-s4-6-2.d | ACQ Method  |             | Comment         | Sample information is unavailable | Acquired Time          | Unavailable |

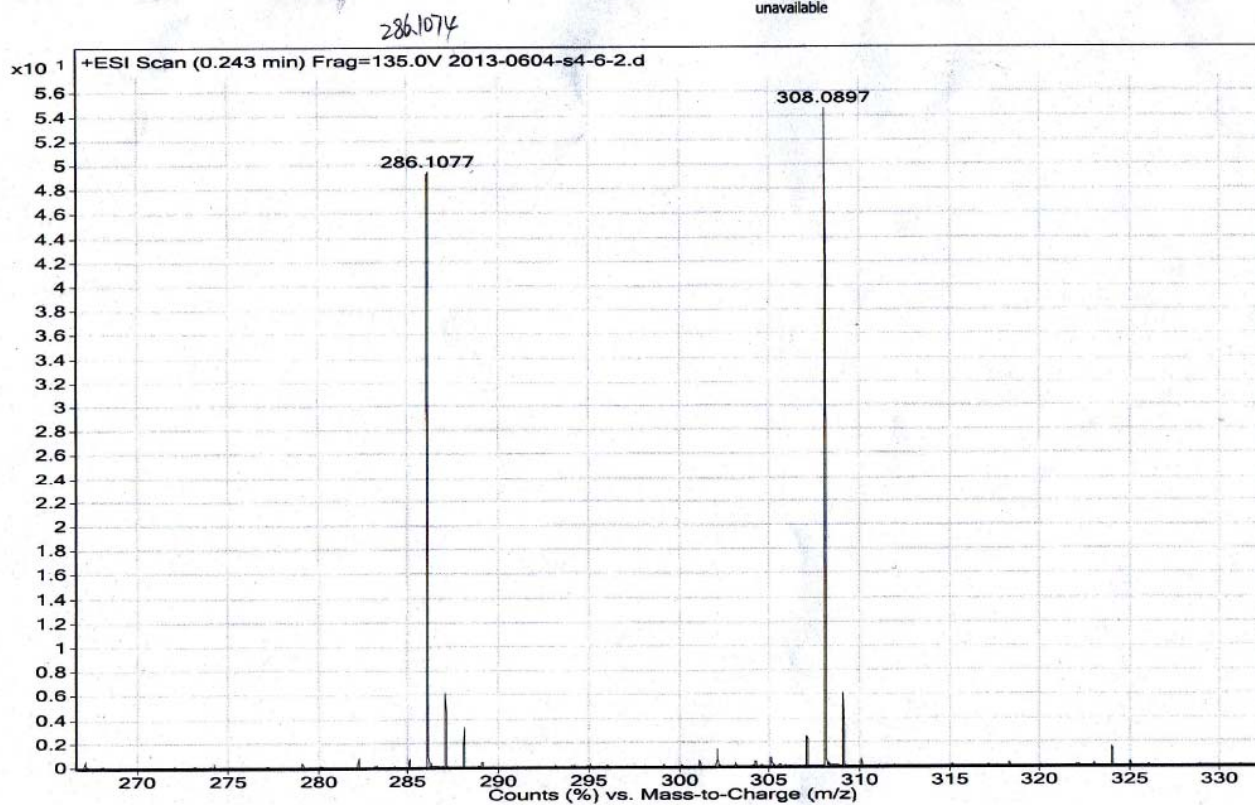

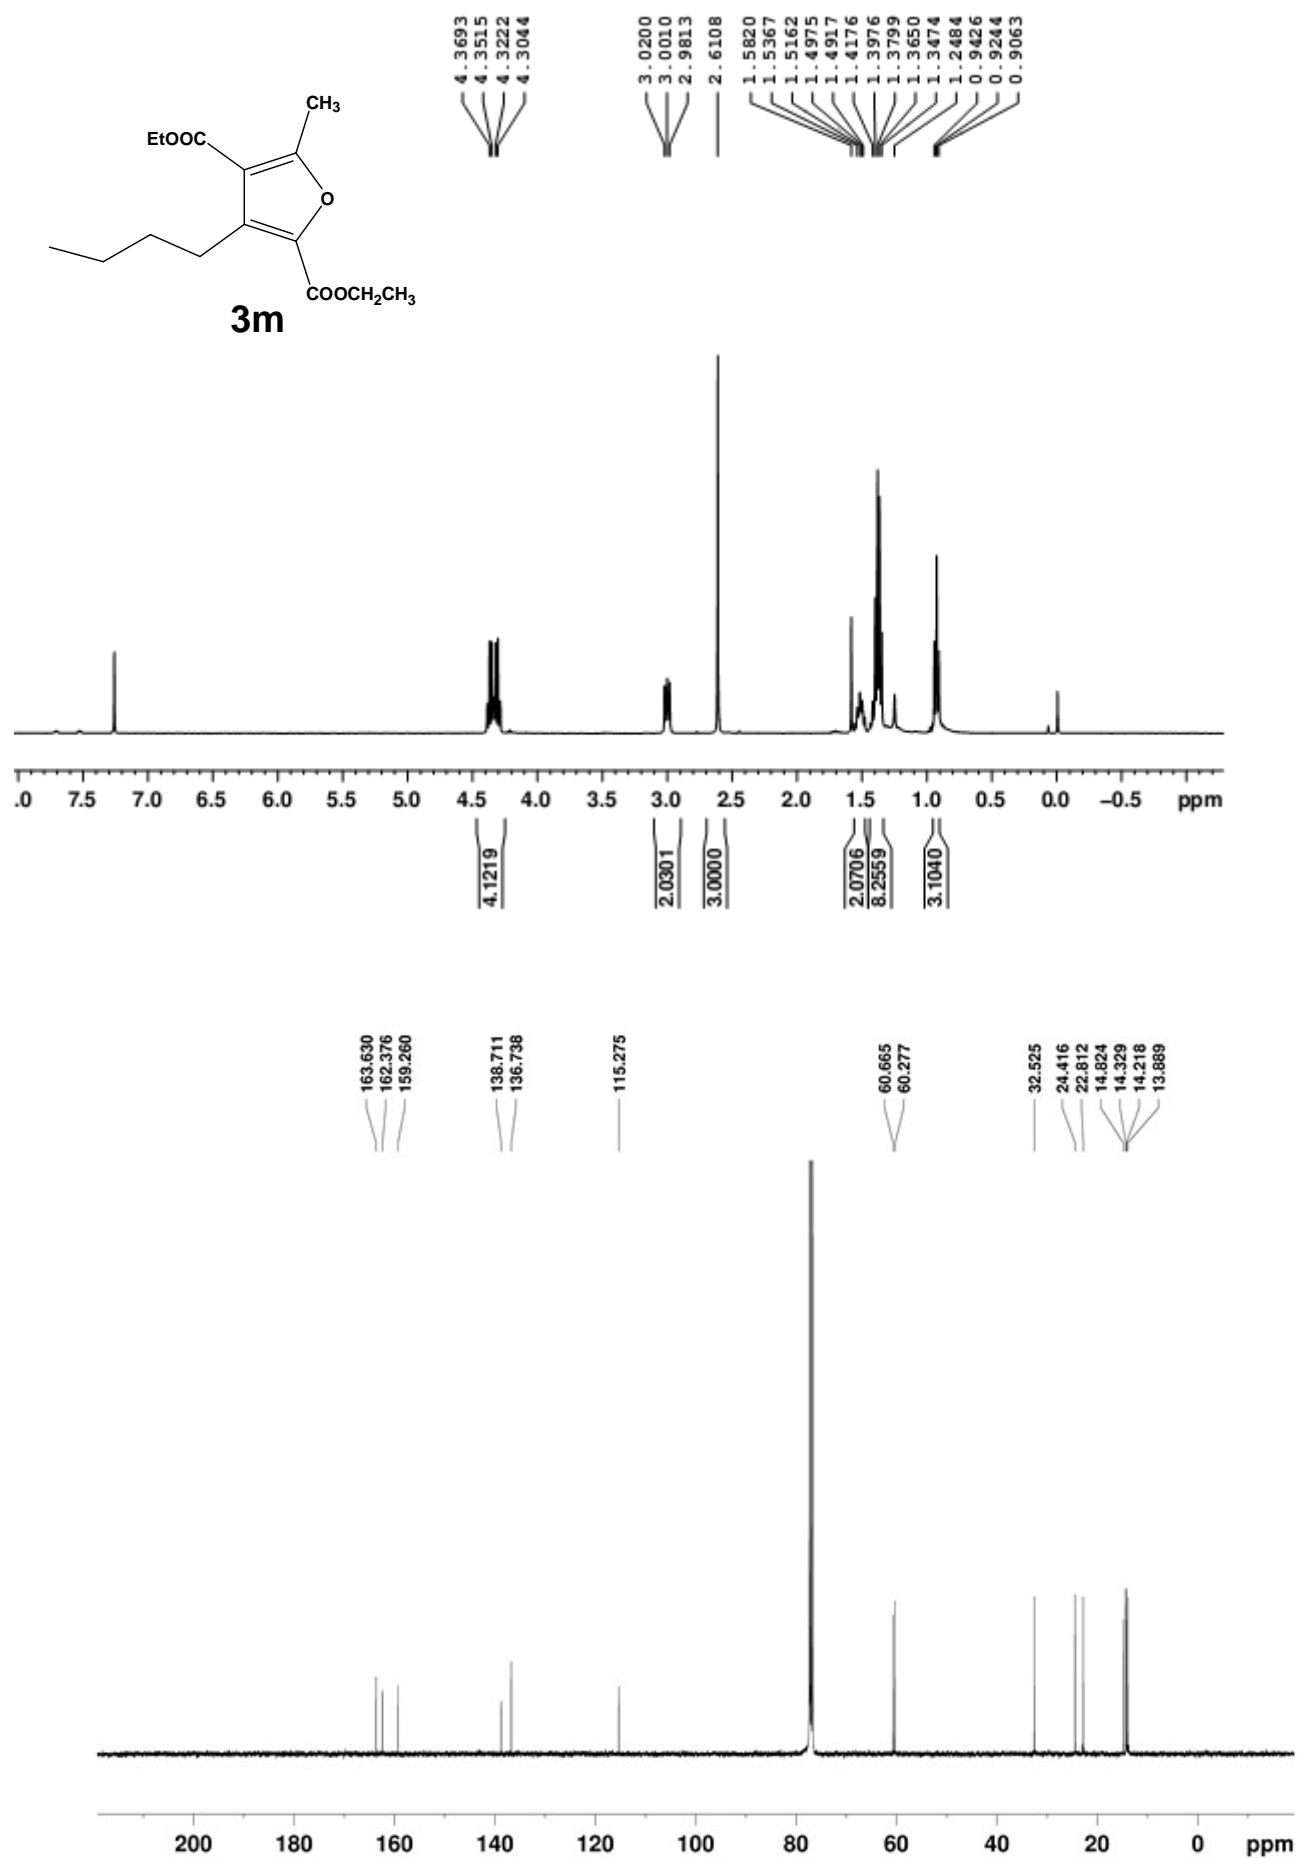

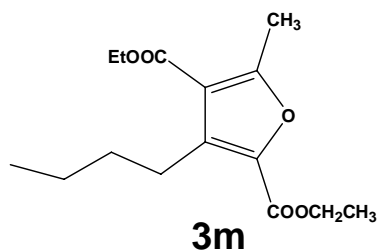

HRMS exact mass calcd for (C<sub>15</sub>H<sub>22</sub>O<sub>5</sub>+H) requires m/z 283.1540, found m/z 283.1548.

|               |                  |             |        |                 |              |                        |                     |
|---------------|------------------|-------------|--------|-----------------|--------------|------------------------|---------------------|
| Sample Name   | 2013-0104-s4-6   | Position    | P1-C9  | Instrument Name | Instrument 1 | User Name              |                     |
| Inj Vol       | -1               | InjPosition |        | SampleType      | Sample       | IRM Calibration Status | Success             |
| Data Filename | 2013-0104-s4-6.d | ACQ Method  | 0103.m | Comment         | 283.1540     | Acquired Time          | 1/4/2013 2:07:37 PM |

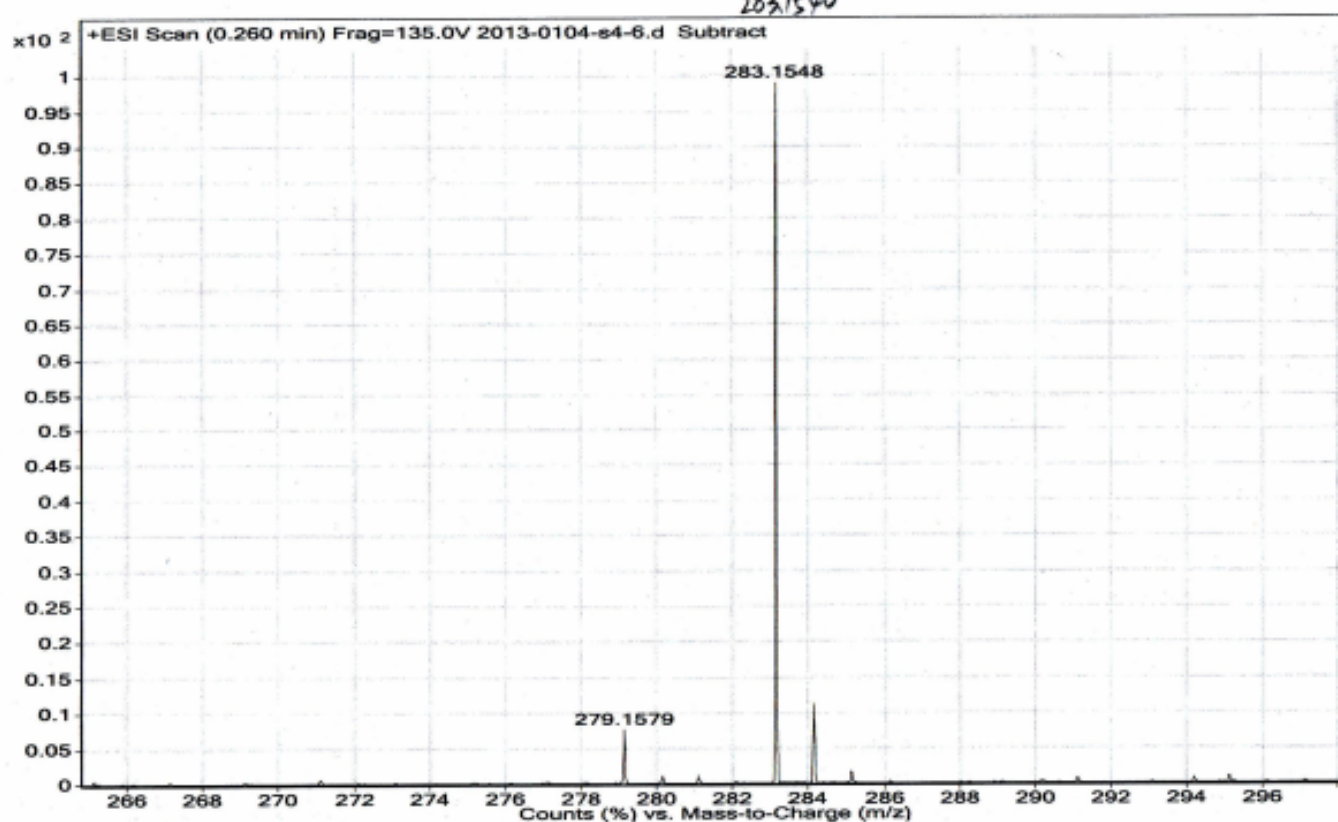

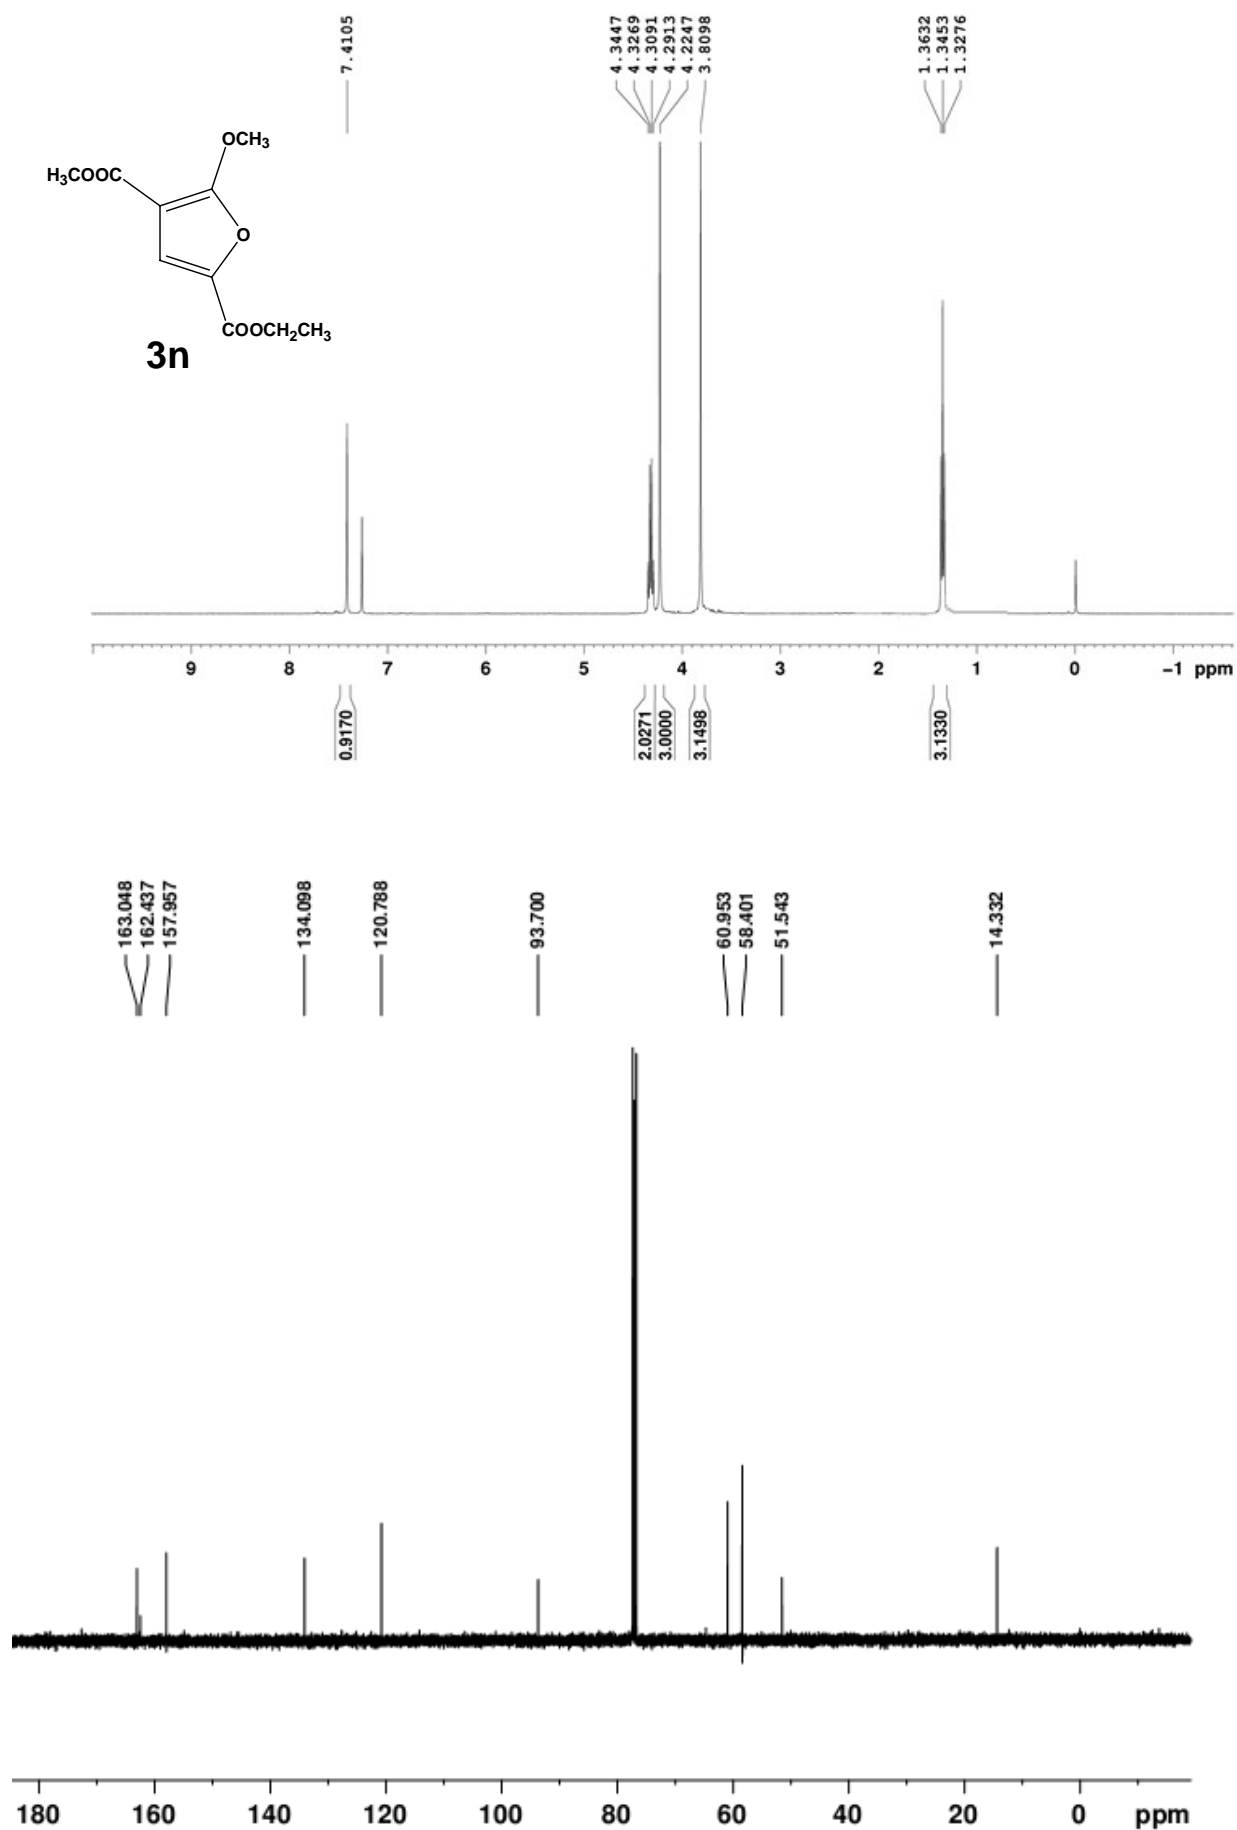

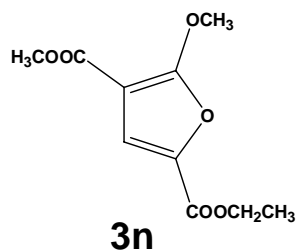

HRMS exact mass calcd for ( $C_{10}H_{12}O_6+H$ ) requires  $m/z$  229.0707, found  $m/z$  229.0702.

|               |                  |             |        |                 |              |                        |                     |
|---------------|------------------|-------------|--------|-----------------|--------------|------------------------|---------------------|
| Sample Name   | 2013-0104-s4-7   | Position    | P1-B9  | Instrument Name | Instrument 1 | User Name              |                     |
| Inj Vol       | -1               | InjPosition |        | SampleType      | Sample       | IRM Calibration Status | Success             |
| Data Filename | 2013-0104-s4-7.d | ACQ Method  | 0103.m | Comment         |              | Acquired Time          | 1/4/2013 2:08:43 PM |

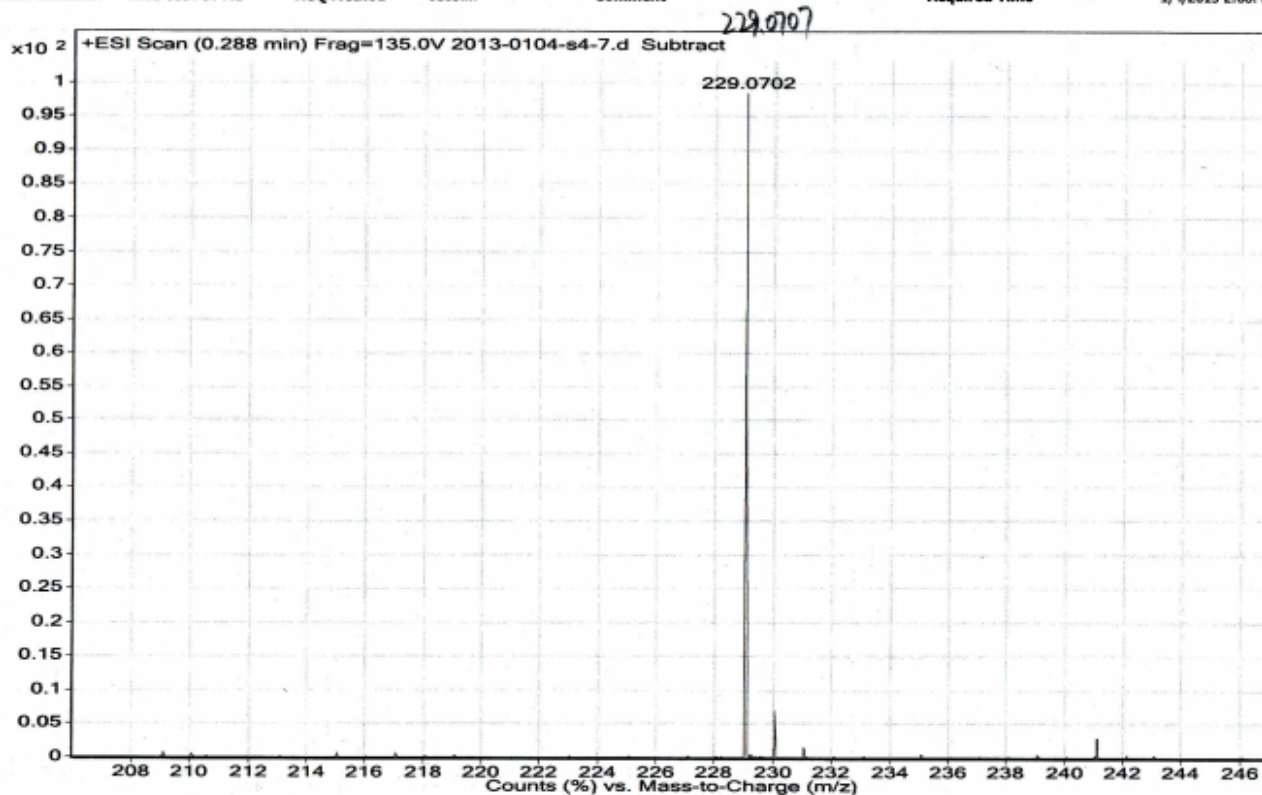

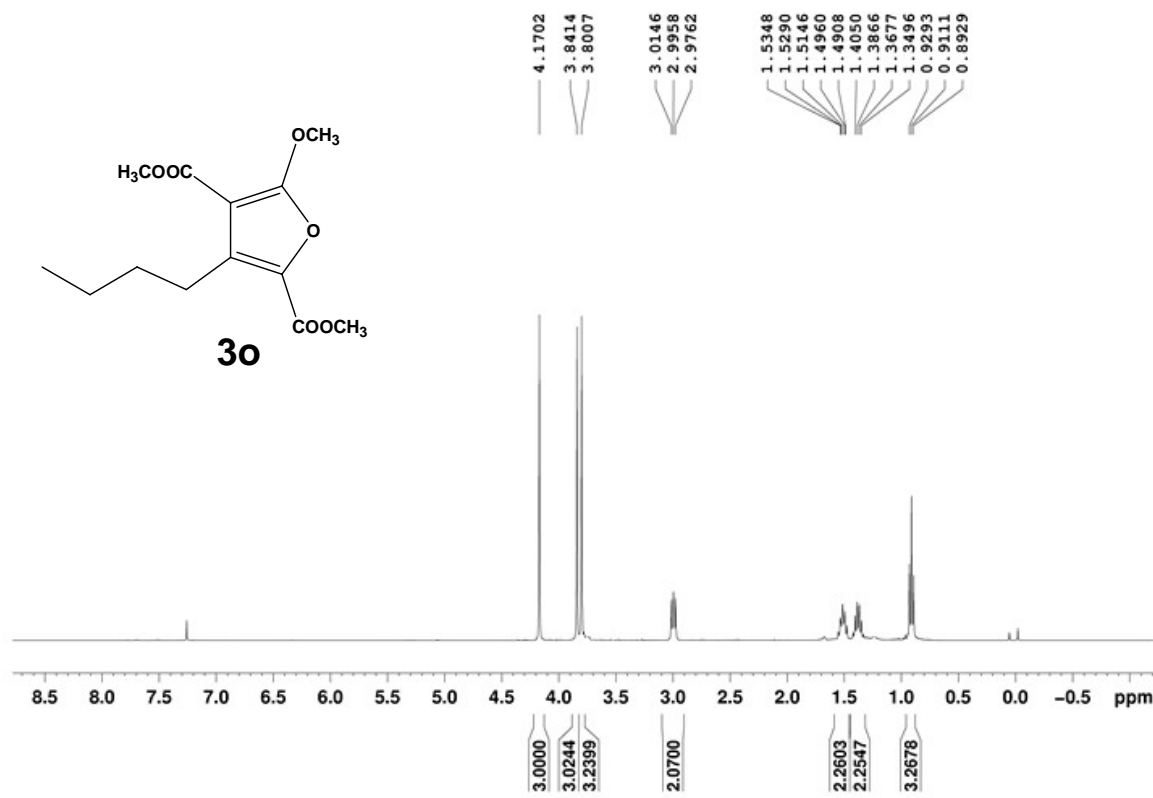

s3-84-C13\_

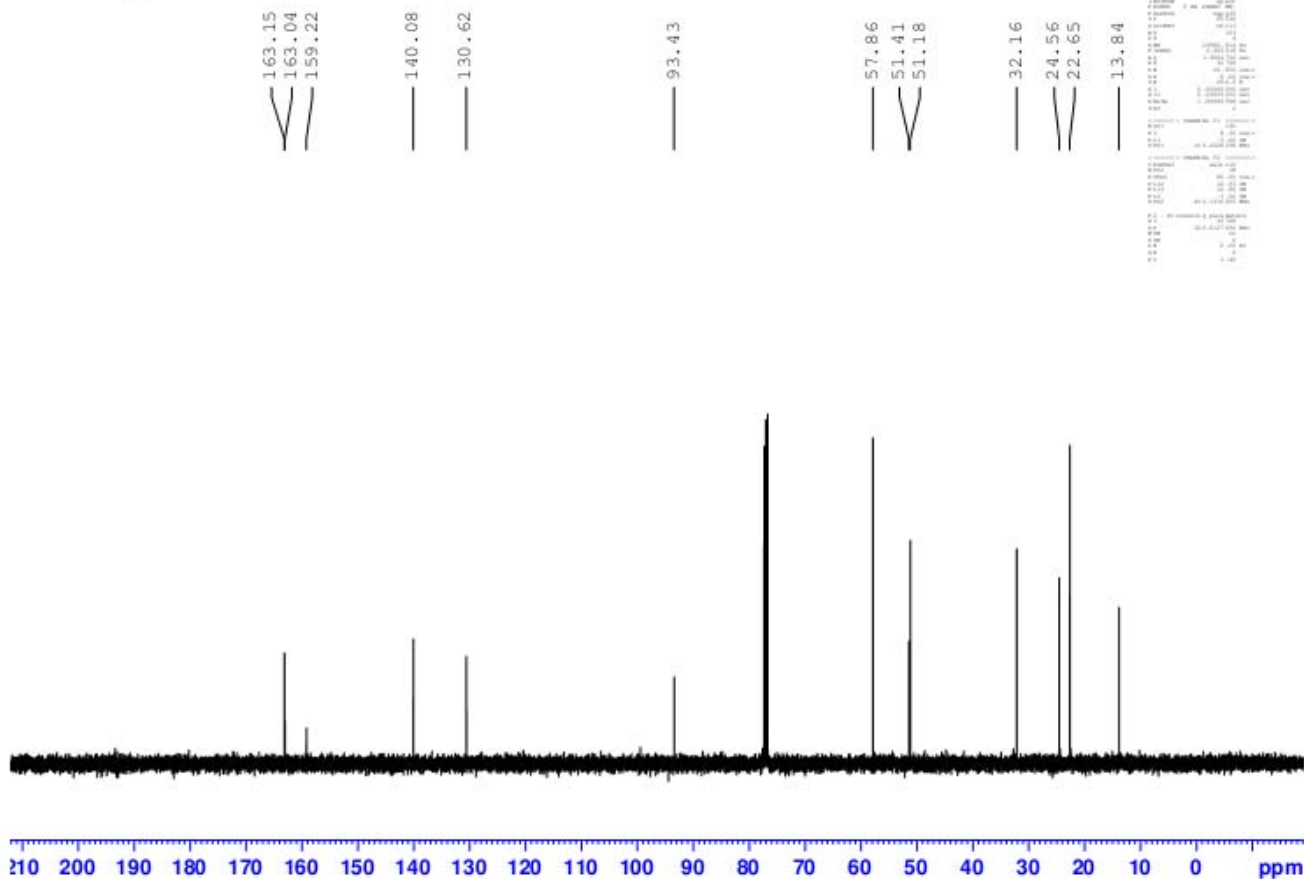



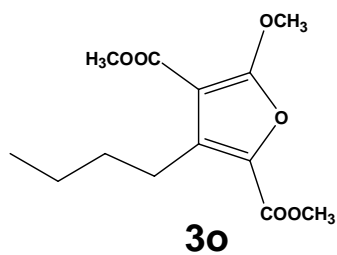

HRMS exact mass calcd for (C<sub>13</sub>H<sub>18</sub>O<sub>6</sub>+H) requires m/z 271.1176, found m/z 271.1184.

|               |                 |             |             |                 |                                   |                        |             |
|---------------|-----------------|-------------|-------------|-----------------|-----------------------------------|------------------------|-------------|
| Sample Name   | Unavailable     | Position    | Unavailable | Instrument Name | Unavailable                       | User Name              | Unavailable |
| Inj Vol       | Unavailable     | InjPosition | Unavailable | SampleType      | Unavailable                       | IRM Calibration Status | Success     |
| Data Filename | 2012-1224-s84.d | ACQ Method  |             | Comment         | Sample information is unavailable | Acquired Time          | Unavailable |

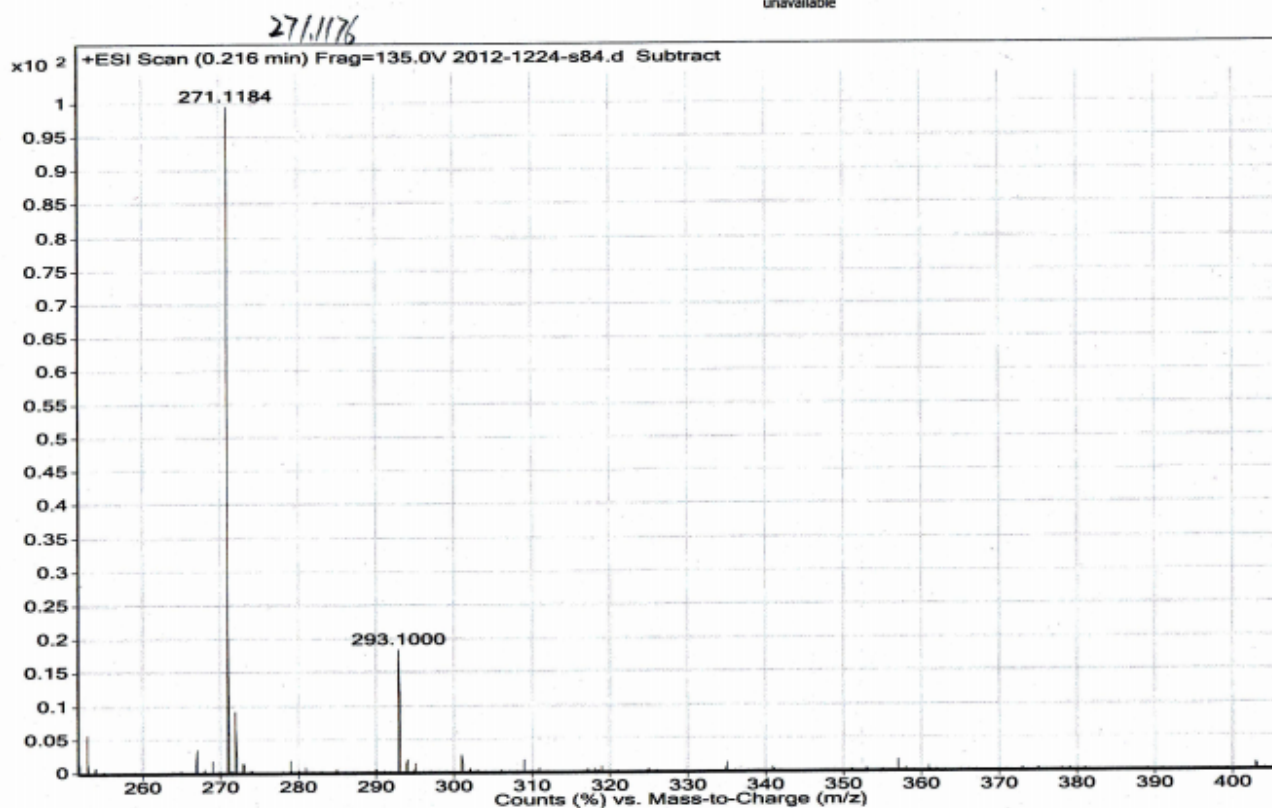



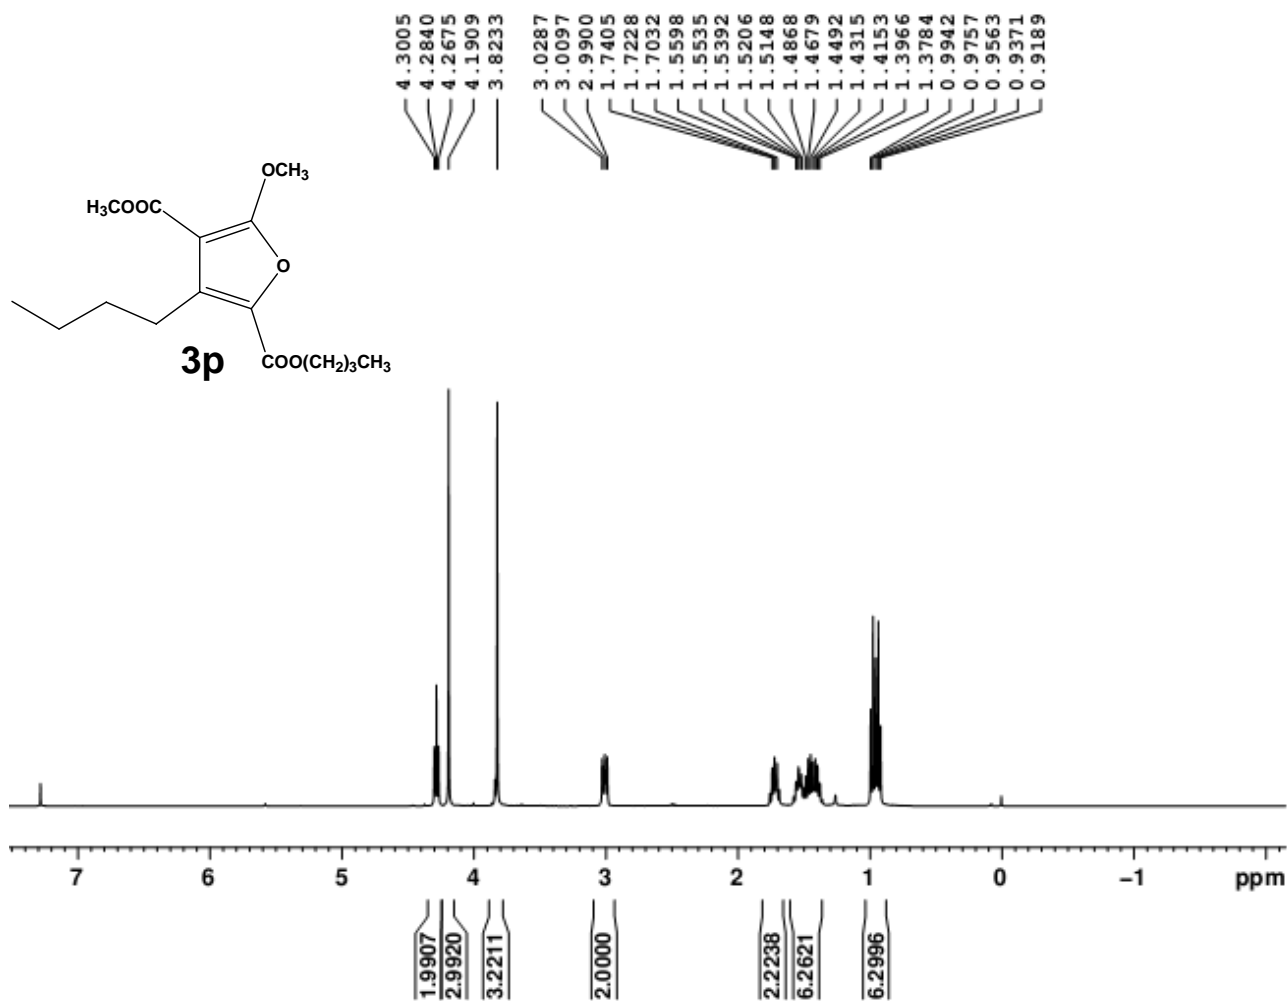

54-9-C13

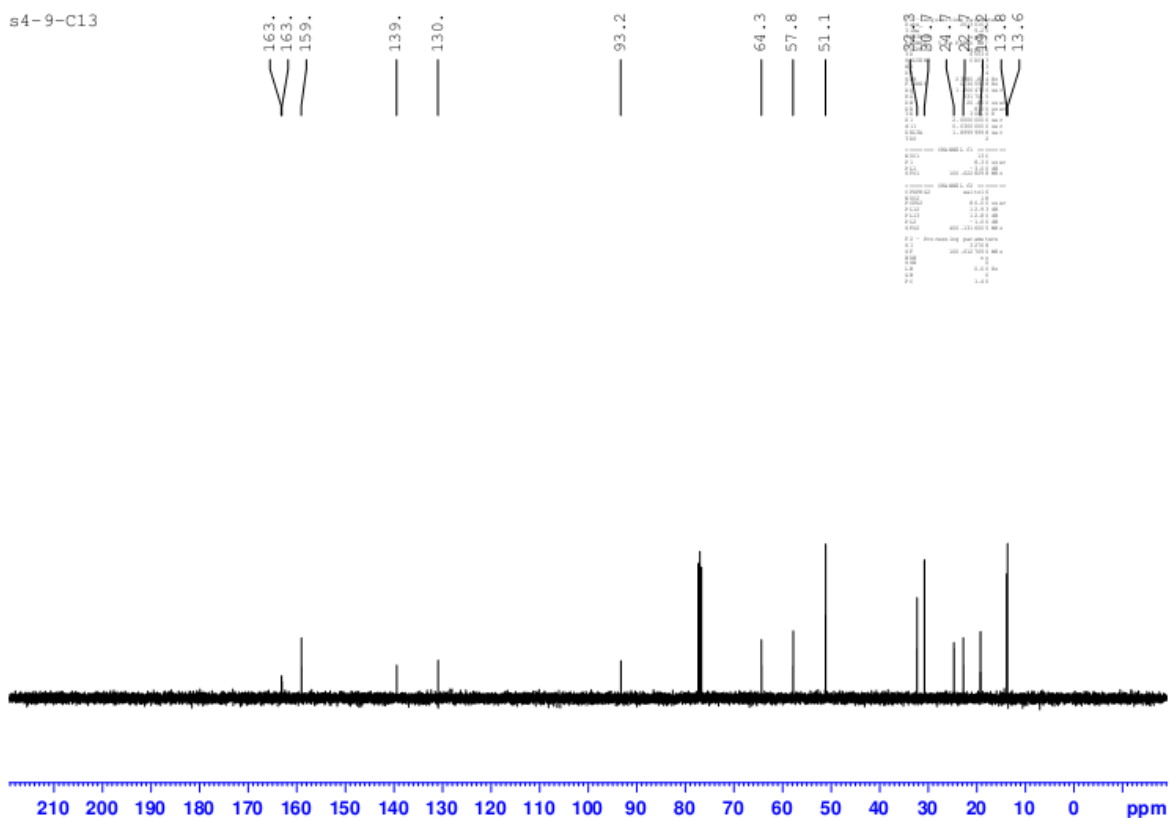

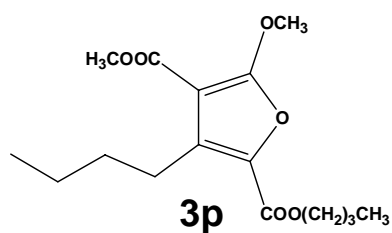

HRMS exact mass calcd for (C<sub>16</sub>H<sub>24</sub>O<sub>6</sub>+H) requires m/z 313.1646, found m/z 313.1649.

|               |                  |             |        |                 |              |                        |                     |
|---------------|------------------|-------------|--------|-----------------|--------------|------------------------|---------------------|
| Sample Name   | 2013-0104-s4-9   | Position    | P1-A9  | Instrument Name | Instrument 1 | User Name              |                     |
| Inj Vol       | -1               | InjPosition |        | SampleType      | Sample       | IRM Calibration Status | Success             |
| Data Filename | 2013-0104-s4-9.d | ACQ Method  | 0103.m | Comment         |              | Acquired Time          | 1/4/2013 2:09:48 PM |

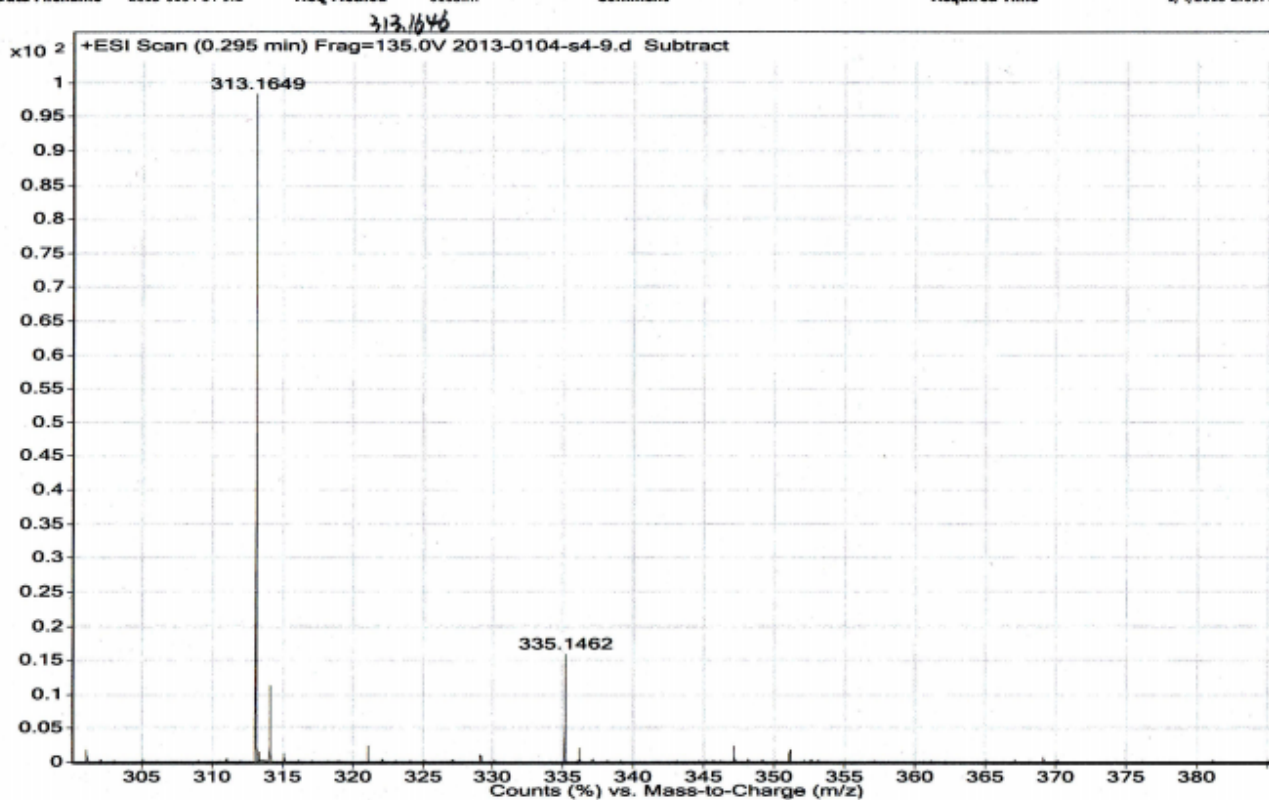

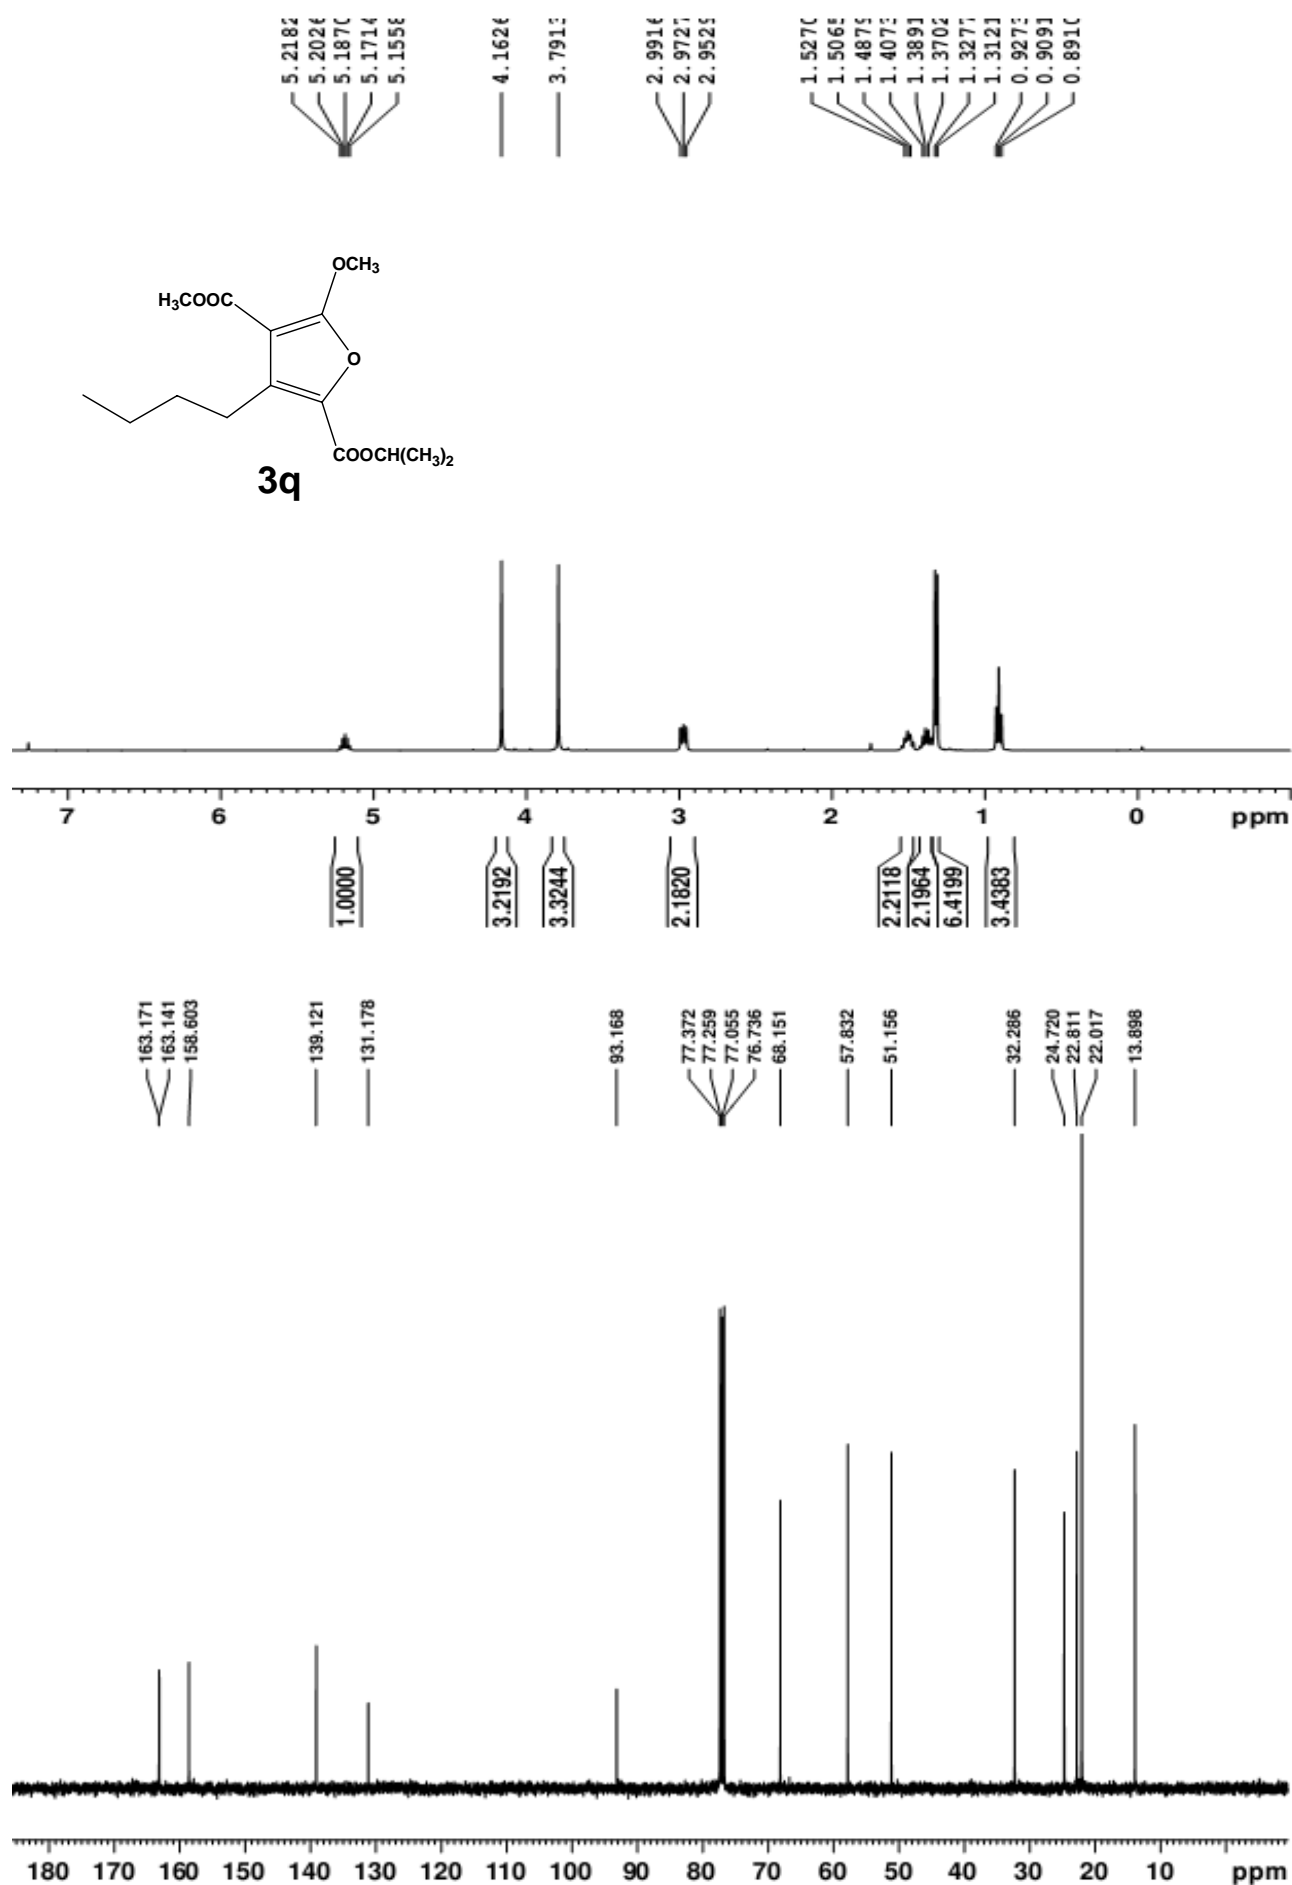

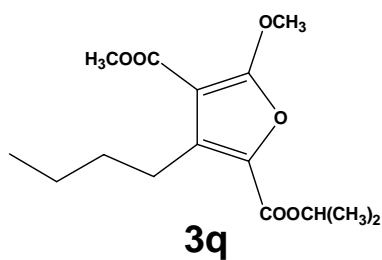

HRMS exact mass calcd for (C<sub>15</sub>H<sub>22</sub>O<sub>6</sub>+Na) requires m/z 299.1489, found m/z 299.1488.

|               |                  |             |        |                 |              |                        |                     |
|---------------|------------------|-------------|--------|-----------------|--------------|------------------------|---------------------|
| Sample Name   | 2013-0104-s4-3   | Position    | P1-E9  | Instrument Name | Instrument 1 | User Name              |                     |
| Inj Vol       | -1               | InjPosition |        | SampleType      | Sample       | IRM Calibration Status | Success             |
| Data Filename | 2013-0104-s4-3.d | ACQ Method  | 0103.m | Comment         |              | Acquired Time          | 1/4/2013 2:06:31 PM |

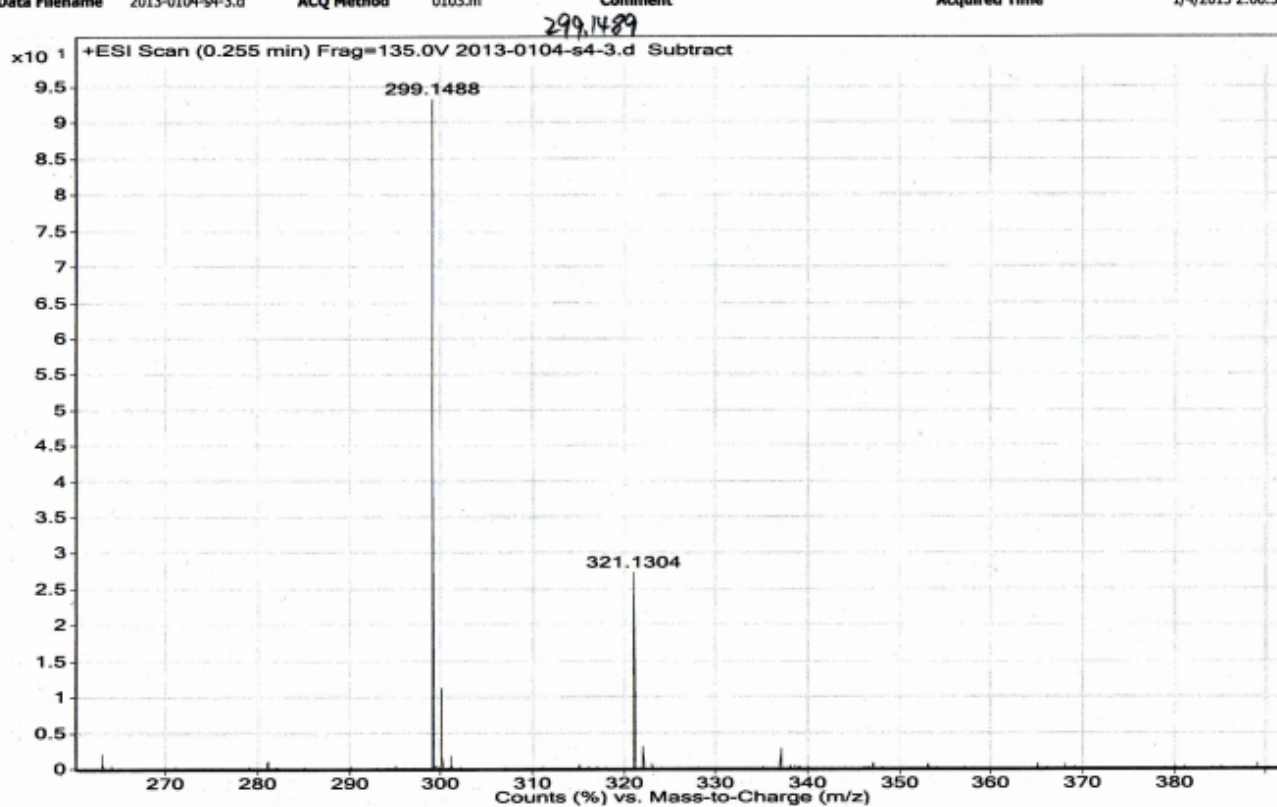

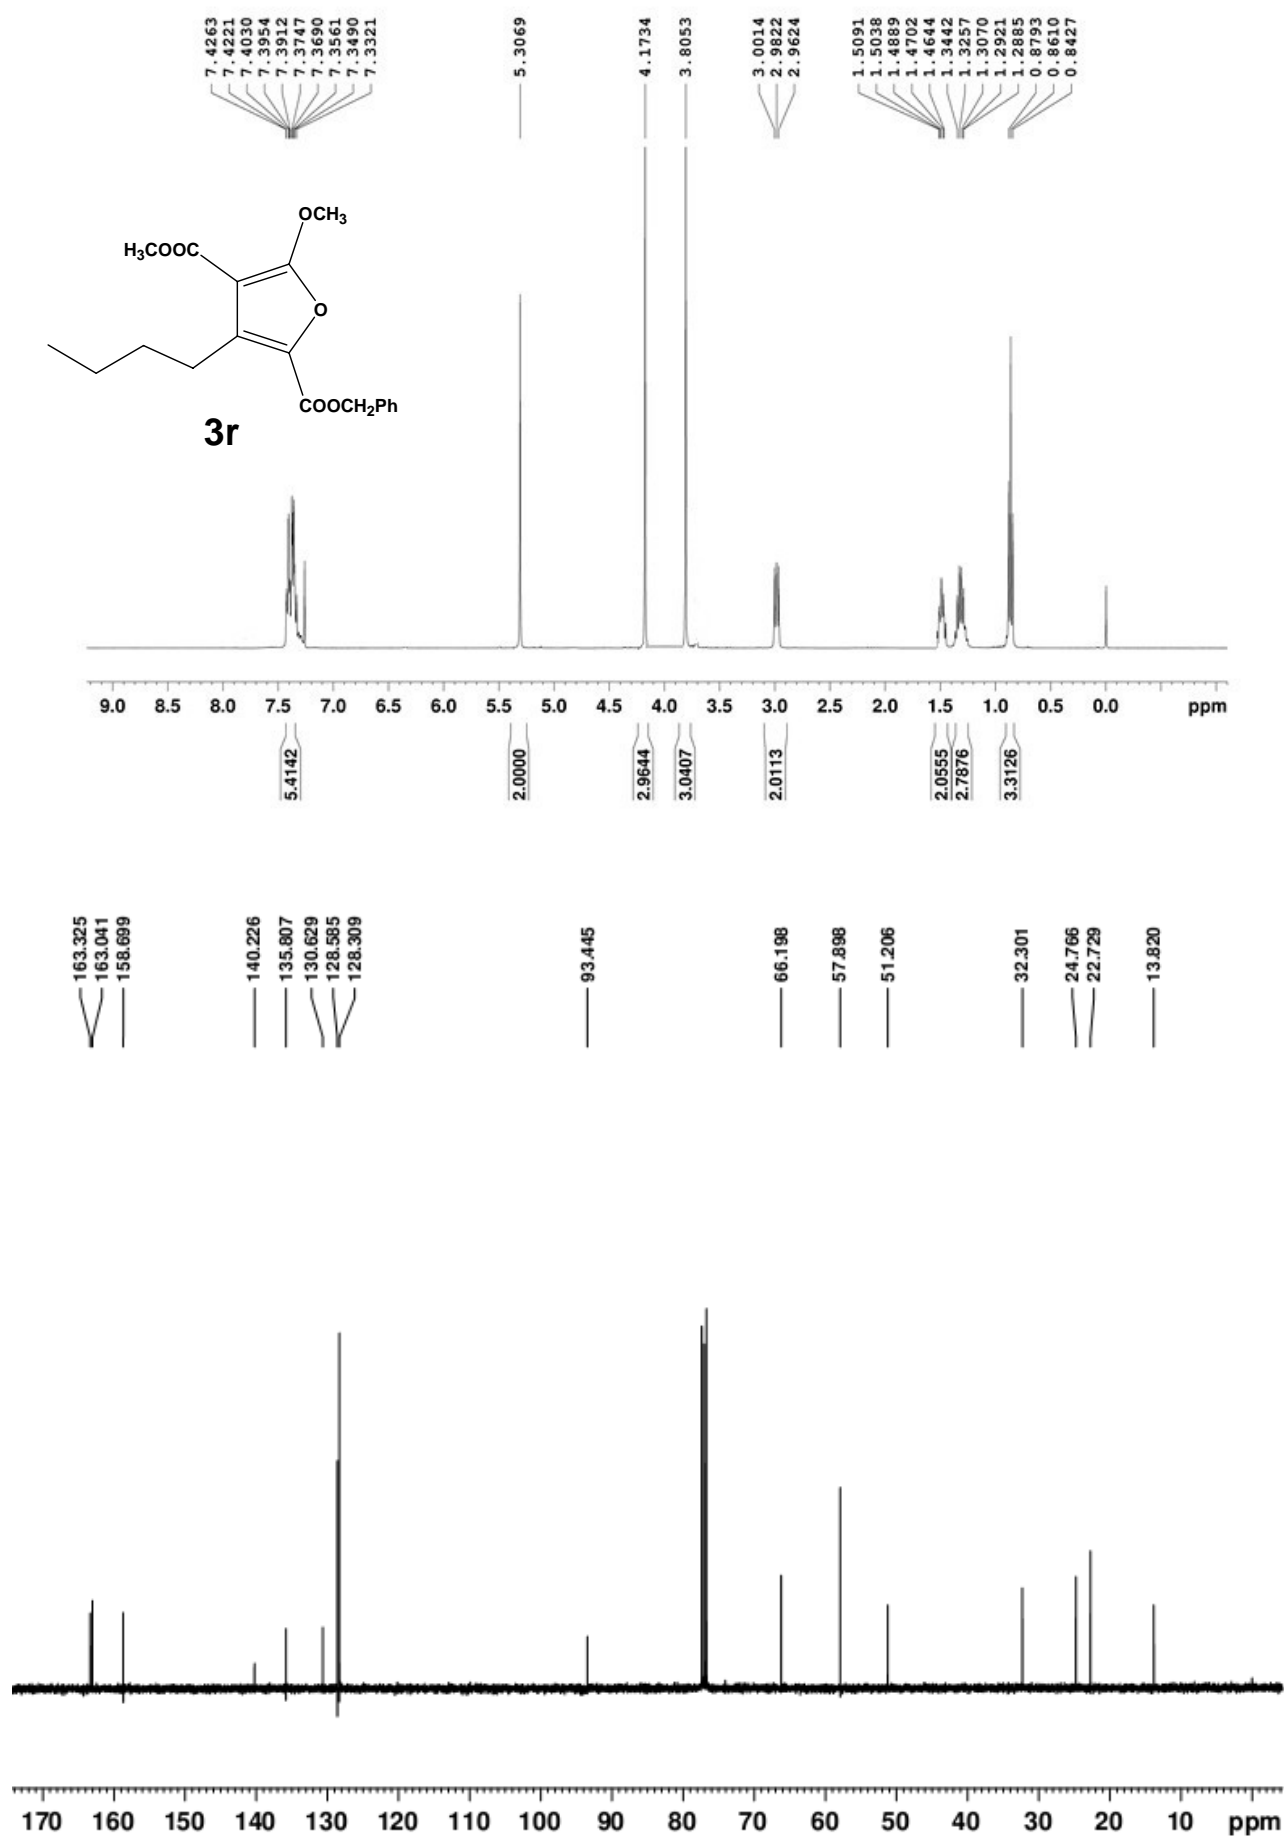

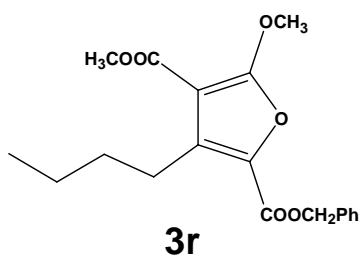

HRMS exact mass calcd for (C<sub>19</sub>H<sub>22</sub>O<sub>6</sub>+H) requires m/z 347.1489, found m/z 347.1483.

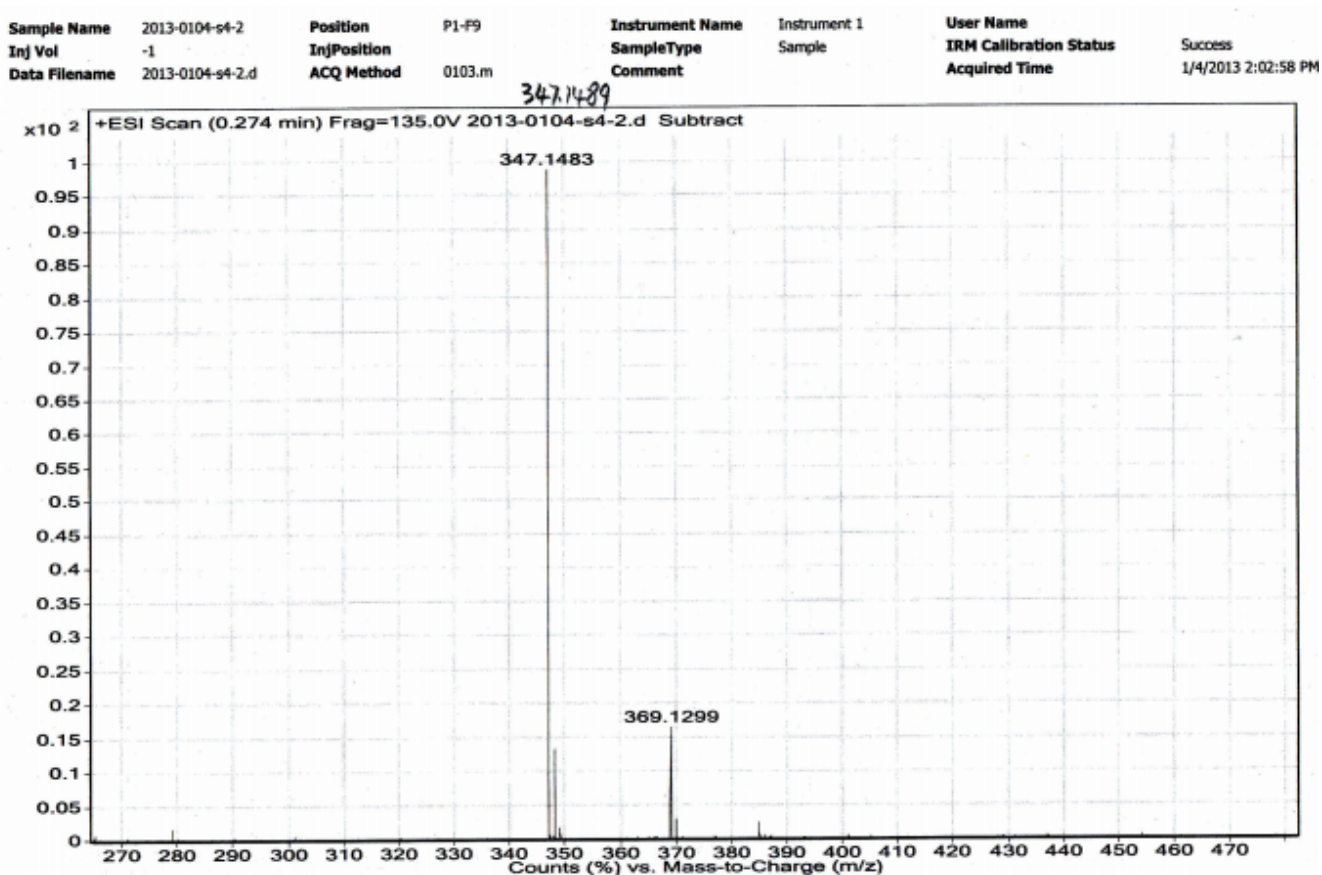

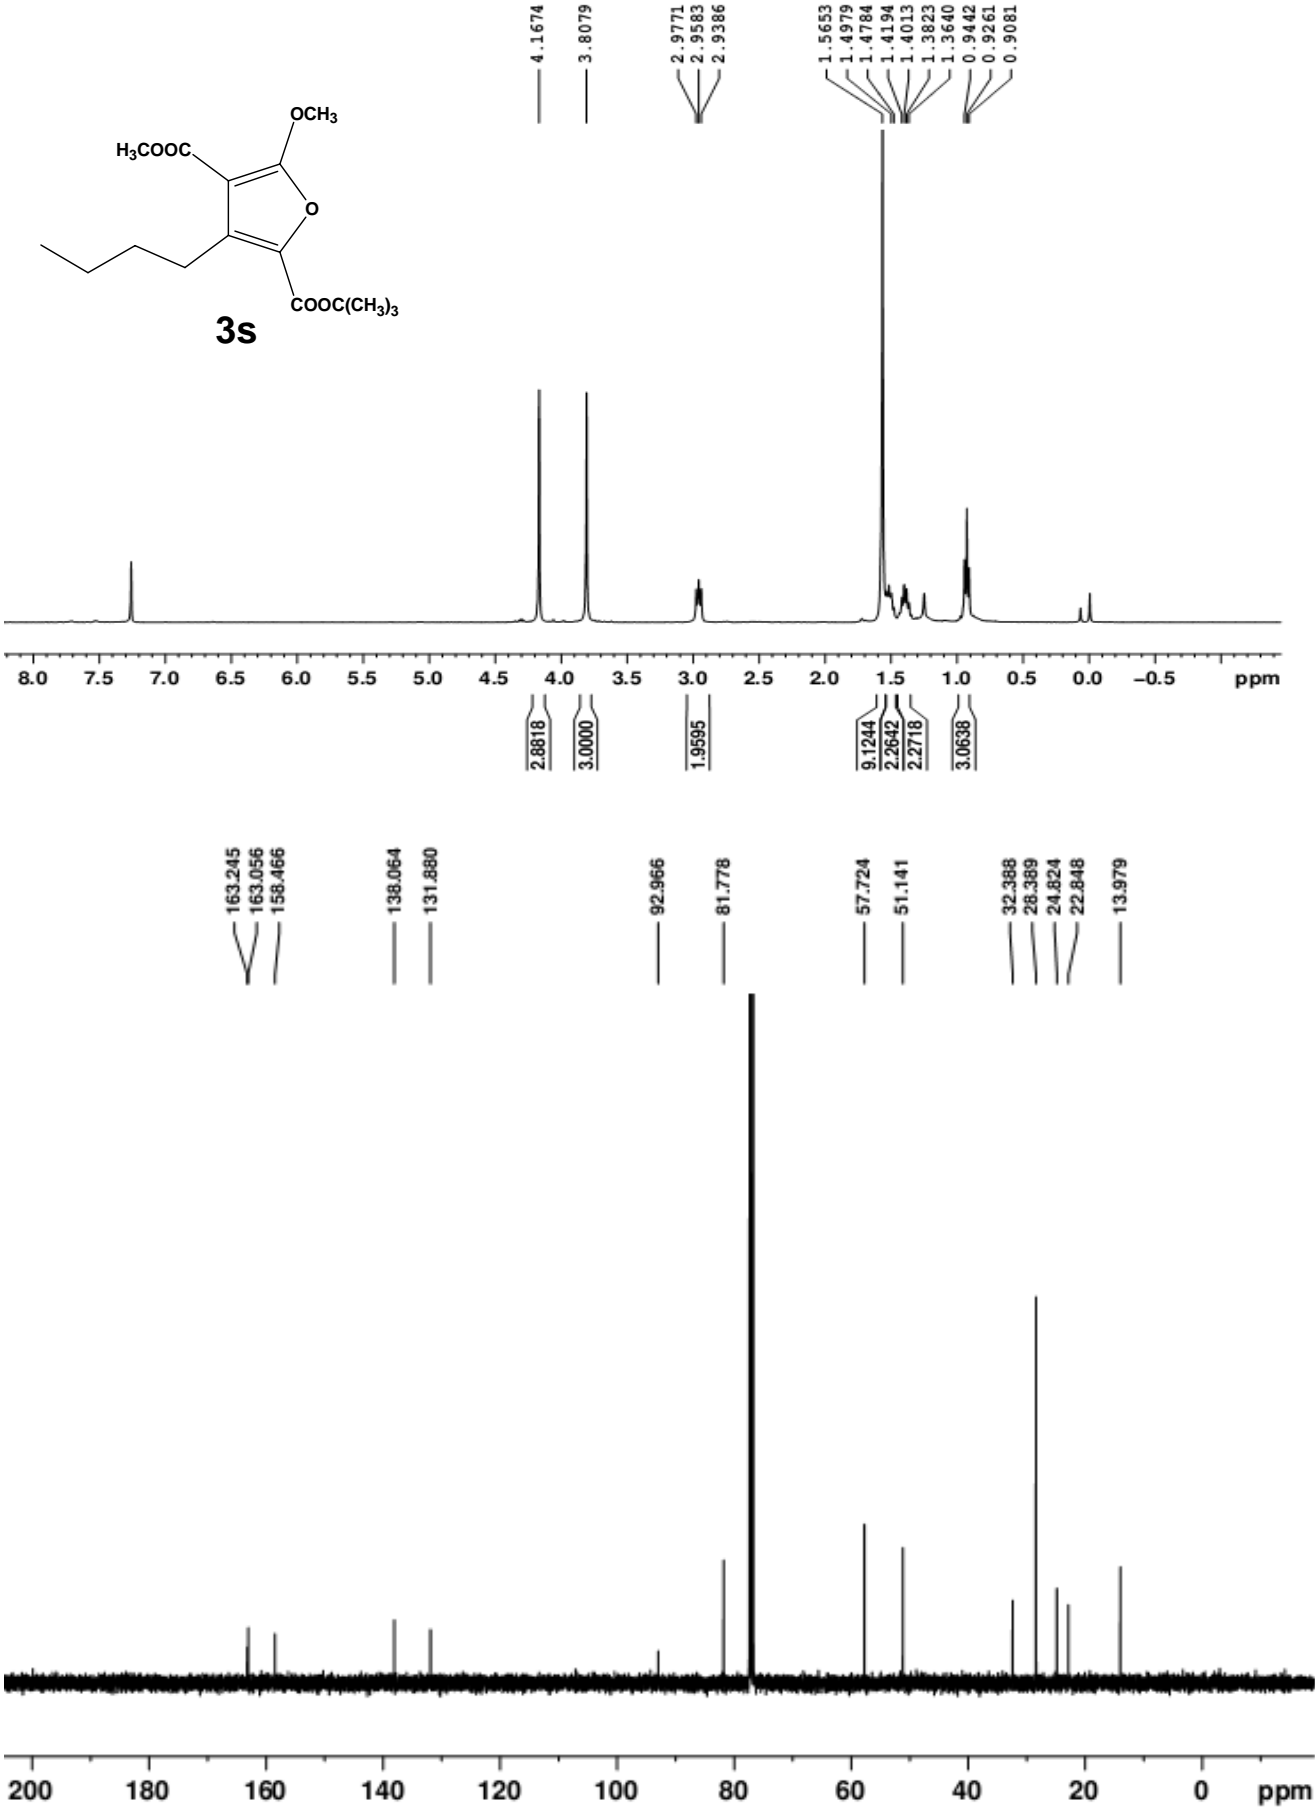

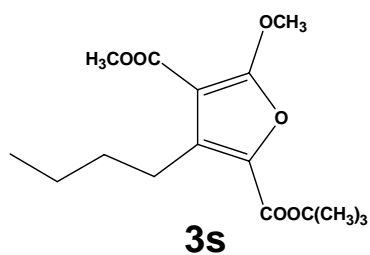

HRMS exact mass calcd for (C<sub>16</sub>H<sub>24</sub>O<sub>6</sub>+Na) requires m/z 335.1465, found m/z 335.1471.

|               |                   |             |        |                 |              |                        |                     |
|---------------|-------------------|-------------|--------|-----------------|--------------|------------------------|---------------------|
| Sample Name   | 2013-0104-s4-10   | Position    | P1-F8  | Instrument Name | Instrument 1 | User Name              |                     |
| Inj Vol       | -1                | InjPosition |        | SampleType      | Sample       | IRM Calibration Status | Success             |
| Data Filename | 2013-0104-s4-10.d | ACQ Method  | 0103.m | Comment         |              | Acquired Time          | 1/4/2013 2:25:01 PM |

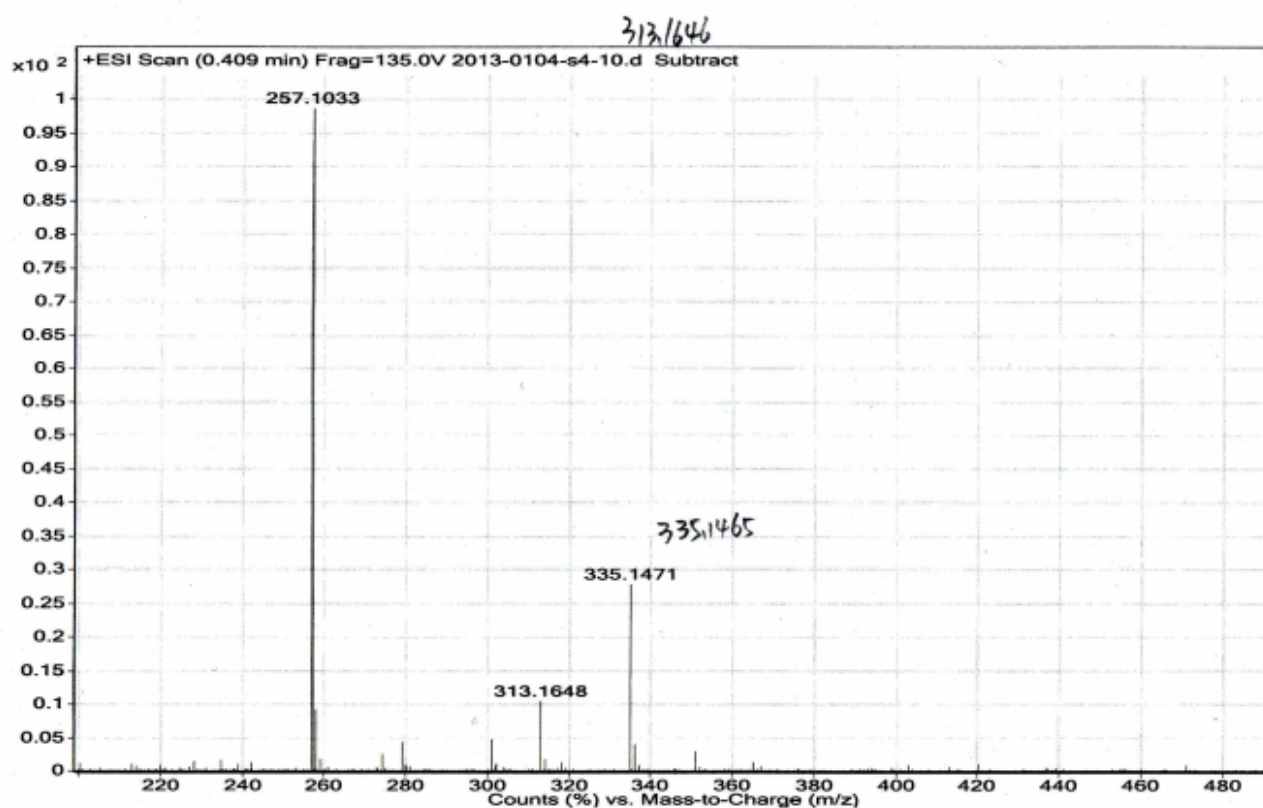

Supplement: c3ob41155a.pdf [file c3ob41155a.pdf]
